# Supplementary material for: Blood-Informative Transcripts Define Nine Common Axes of Peripheral Blood Gene Expression
Source: PubMed Central journal article supplement (PMC3597511; doi:10.1371/journal.pgen.1003362), 2013-03-14

Supplementary Figure S3A Preininger et al, 2012

BIT Axis 1

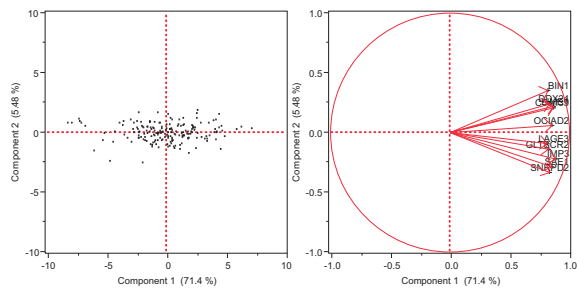

BIT Axis 2

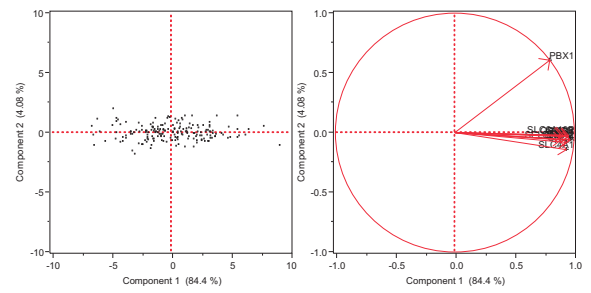

BIT Axis 3

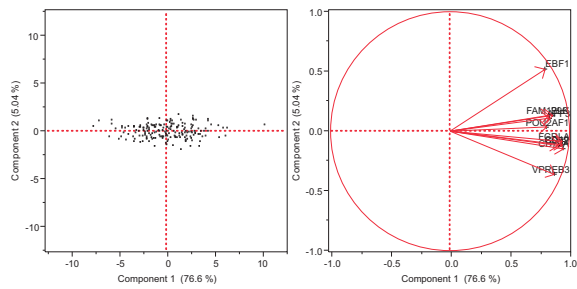

BIT Axis 4

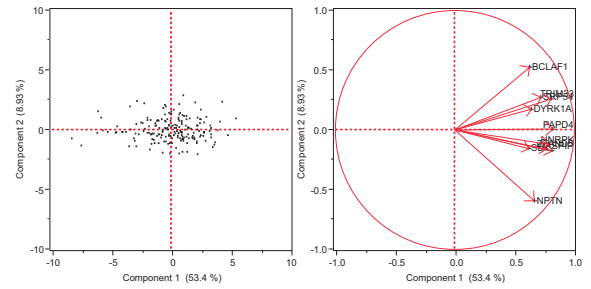

BIT Axis 5

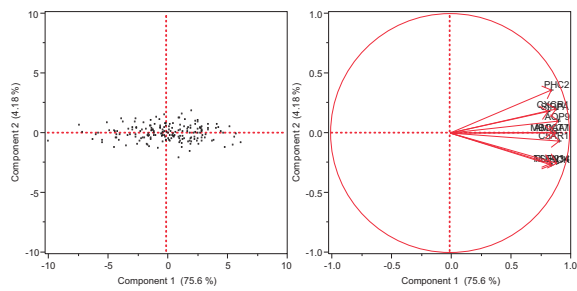

BIT Axis 6

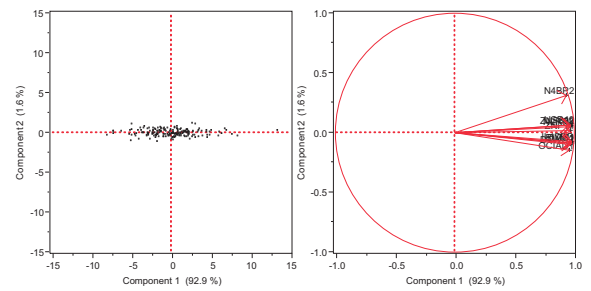

BIT Axis 7

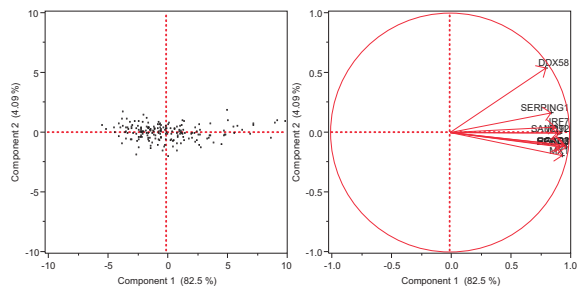

BIT Axis 9

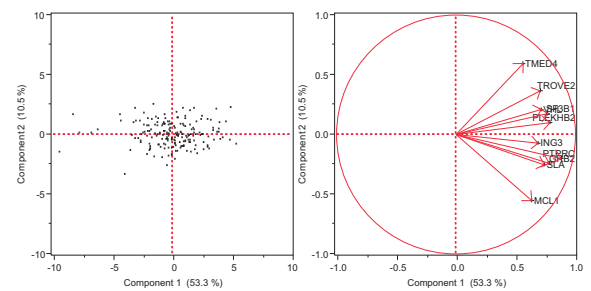

Typical Random Set

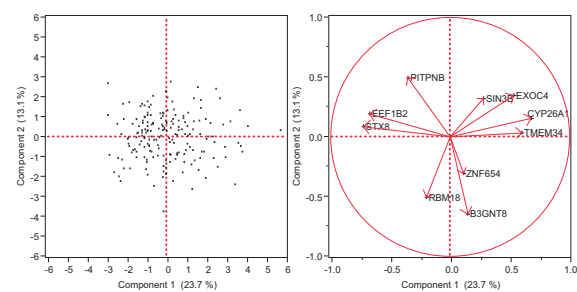

J. Variance explained by BITs

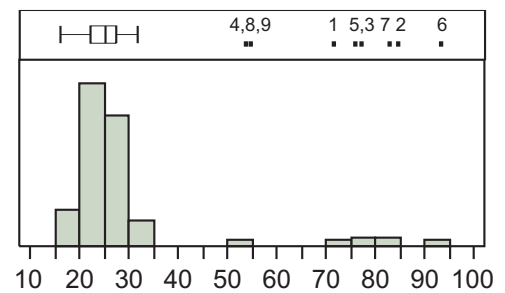

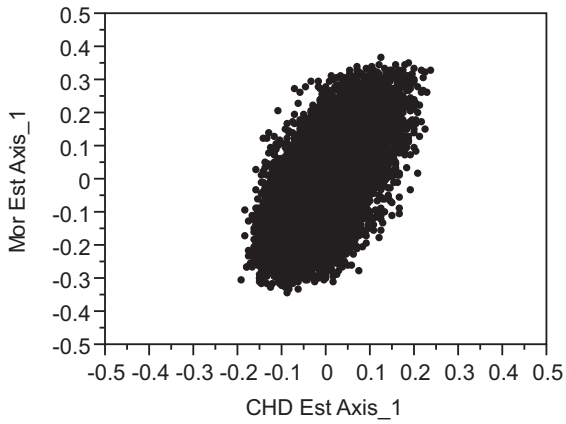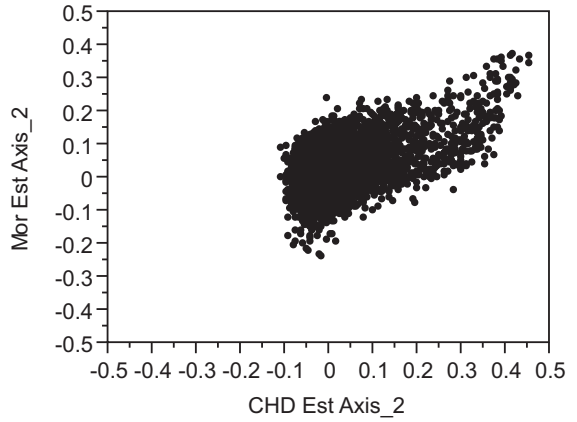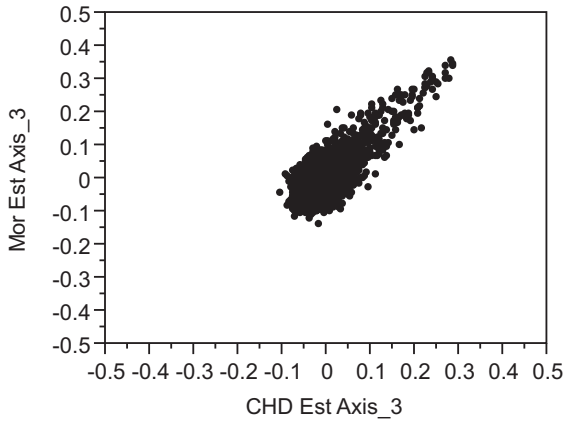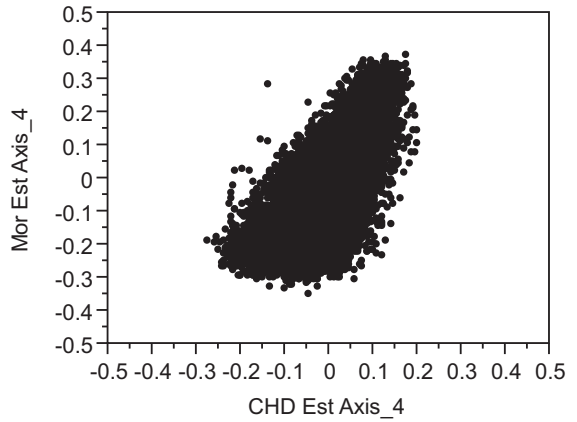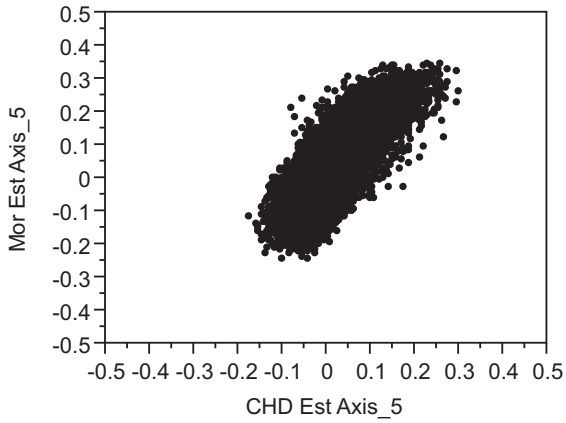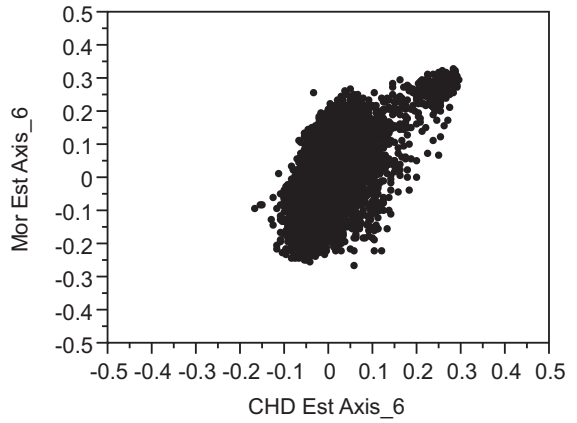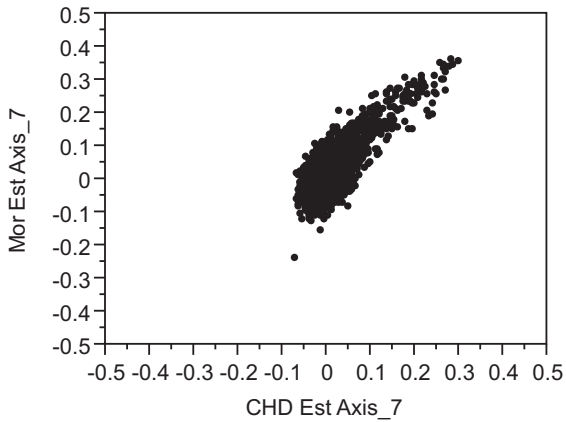

Axis 1

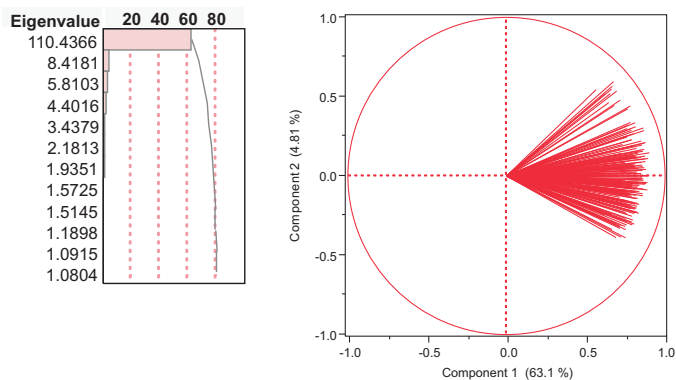

Axis 2

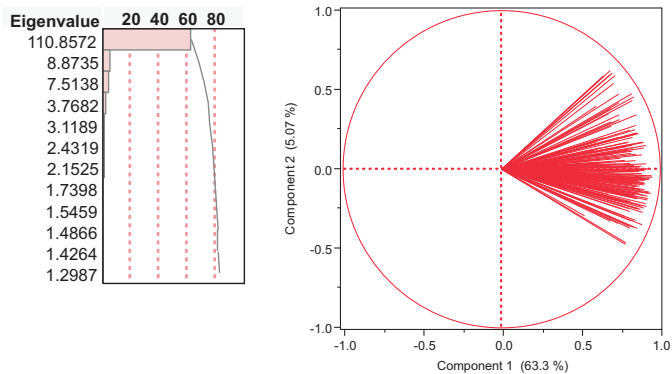

Axis 3

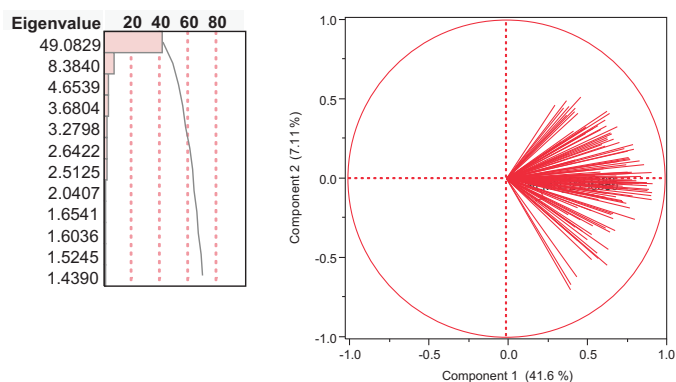

Axis 4

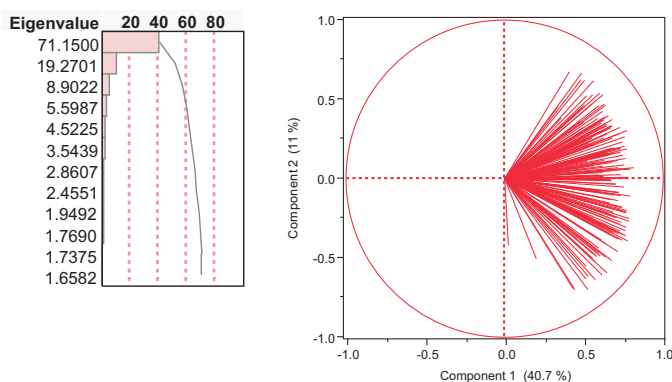

Axis 5

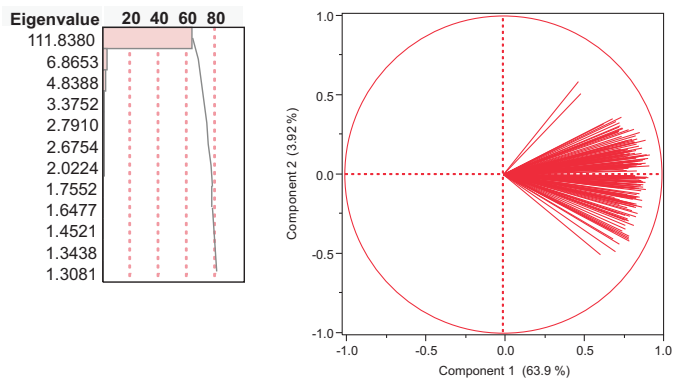

Axis 6

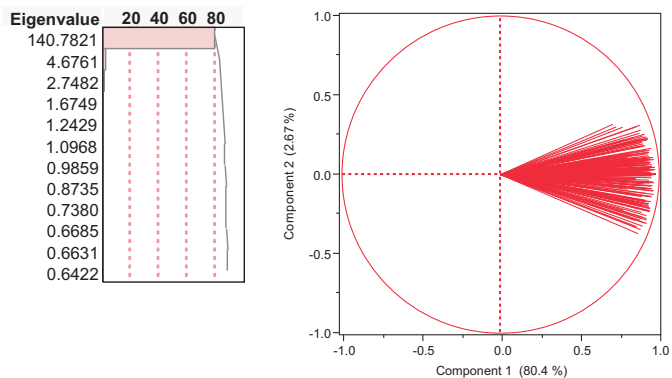

Axis 7

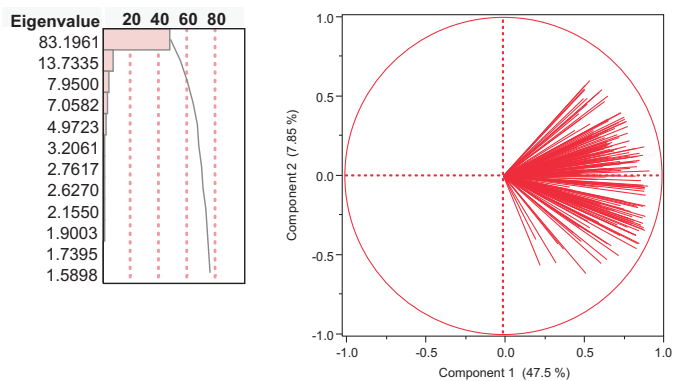

Module 3.5

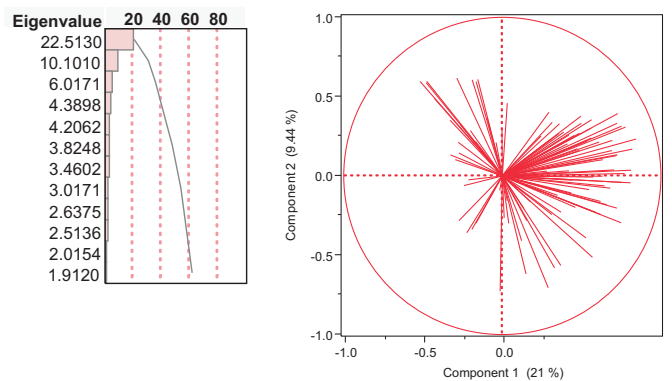

Supplement: pgen.1003362.s007.pdf [file pgen.1003362.s007.pdf]
