# Supplementary material for: Blood-Informative Transcripts Define Nine Common Axes of Peripheral Blood Gene Expression
Source: PLoS Genet. 2013 Mar 14;9(3):e1003362. doi: 10.1371/journal.pgen.1003362 (PMC3597511; doi:10.1371/journal.pgen.1003362)
Supplement: Dataset S1 — List of genes associated with each of the 9 axes in both Atlanta and Morocco. The 9 sets of columns show the Illumina Probe identifier, the Gene name, and the negative logarithm of the p-value (NLP) for the association of the transcript with the axis score (PC1) in the multiple regression with all 9 axes in Atlanta (NLP_ATL) and Morocco (NLP_MOR). Only probes significant at the Bonferroni adjusted significance level (NLP>5.53) in both studies are included, and they are sorted by average NLP. (XLSX) [file pgen.1003362.s001.xlsx]

## Sheet: Sheet1
Axis 1					Axis 2					Axis 3					Axis 4					Axis 5					Axis 6					Axis 7					Axis 8					Axis 9
936 Probe IDs	866 Genes	NLP_ATL	NLP_MOR		265 Probe IDs	237 Genes	NLP_ATL	NLP_MOR		118 Probe IDs	99 Genes	NLP_ATL	NLP_MOR		1081 Probe IDs		NLP_ATL	NLP_MOR		1220 Probe IDs	1028 Genes	NLP_ATL	NLP_MOR		569 Probe IDs	550 Genes	NLP_ATL	NLP_MOR		221 Probe IDs	169 Genes	NLP_ATL	NLP_MOR		599 Probe IDs	571 Genes	NLP_ATL	NLP_MOR		268 Probe IDs	242 Genes	NLP_ATL	NLP_MOR
ILMN_1733696	IMP3	47.151	30.7356		ILMN_1680652	SELENBP1	88.9346	85.8625		ILMN_1782704	CD19	84.4781	96.9209		ILMN_1681845	PAPD4	30.3864	56.8223		ILMN_1722218	MBOAT7	52.4224	85.7572		ILMN_2162367	DMC1	124.067	131.903		ILMN_1657871	RSAD2	111.027	108.671		ILMN_2066348	HERPUD2	23.4652	64.4835		ILMN_1674780	SF3B1	35.0415	71.0515
ILMN_2325837	CD3D	48.234	28.6222		ILMN_1814397	EPB42	87.9886	76.5217		ILMN_1734878	CD79A	89.3893	89.304		ILMN_2357272	BCLAF1	18.7784	63.9505		ILMN_1719661	SEPX1	50.2749	84.8271		ILMN_2075794	NLRP8	112.026	127.225		ILMN_1729749	HERC5	112.167	105.803		ILMN_1783852	CD164	33.604	50.5962		ILMN_2272074	TROVE2	27.9967	64.4316
ILMN_2261416	CD3D	51.3939	23.8642		ILMN_1772809	SLC4A1	66.5371	86.9431		ILMN_1691071	FCRLA	83.1758	69.2187		ILMN_1682316	TRIM33	30.9894	51.2715		ILMN_1662524	IL8RA	55.9221	73.2516		ILMN_2407851	IL17RD	120.092	115.298		ILMN_1723912	IFI44L	104.656	98.1454		ILMN_2183885	C7orf11	29.2439	52.8055		ILMN_1748797	GRB2	19.6938	58.7929
ILMN_1657204	SAE1	37.287	35.0029		ILMN_1807919	TNS1	74.0492	65.6325		ILMN_2366212	CD79B	71.4637	54.8256		ILMN_1764168	STXBP3	22.204	57.37		ILMN_1715068	AQP9	52.3297	65.968		ILMN_2313889	ZNF682	111.059	114.097		ILMN_1745397	OAS3	92.8557	97.8222		ILMN_2379788	HIF1A	31.372	44.0776		ILMN_2340217	PTPRC	39.9306	32.4571
ILMN_2098616	C5orf39	41.3403	30.3208		ILMN_1766165	SNCA	66.212	64.3814		ILMN_1700147	VPREB3	54.59	70.2246		ILMN_2155228	CRLF3	15.4451	63.9023		ILMN_1808047	PHC2	38.081	75.916		ILMN_2054554	DTWD2	108.09	113.877		ILMN_1760062	IFI44	94.8101	95.6873		ILMN_2196588	C18orf32	25.4143	49.2274		ILMN_1804148	TMED4	19.6509	48.8386
ILMN_1700306	OCIAD2	40.8901	30.5909		ILMN_1701933	SNCA	59.7019	69.1905		ILMN_1659227	CD79A	78.6395	45.0976		ILMN_1668417	WASPIP	22.5197	56.5866		ILMN_1689836	C5AR1	57.1752	56.5773		ILMN_1693789	ALPP	108.822	111.058		ILMN_1701789	IFIT3	91.1483	95.9302		ILMN_2179397	TATDN1	29.4678	43.7857		ILMN_1801984	VHL	23.0267	43.7841
ILMN_1731174	LOC647856	39.9644	30.924		ILMN_1729487	GMPR	73.7511	45.0011		ILMN_1785439	CD79B	67.8919	54.9701		ILMN_1661593	FAM18B	17.2867	58.3035		ILMN_2335704	NCF4	47.8944	65.2471		ILMN_1680279	USP49	93.8631	123.954		ILMN_1707695	IFIT1	93.553	92.6878		ILMN_1658531	LOC653702	24.5586	48.1197		ILMN_1653652	PTPRC	34.7896	31.8752
ILMN_1719205	FBL	37.8398	32.6478		ILMN_1701386	STRADB	57.2938	56.2221		ILMN_1794927	LOC90925	58.6327	60.4977		ILMN_1758906	GNA13	20.5914	54.1681		ILMN_1799030	CMTM2	42.2253	70.0811		ILMN_2106658	BLZF1	100.408	109.965		ILMN_1664543	IFIT3	92.2751	80.7335		ILMN_1782222	KIAA1033	26.9941	45.5401		ILMN_1698323	PLEKHB2	23.8089	40.6578
ILMN_2183687	LIME1	46.6642	23.2548		ILMN_1696512	AHSP	47.5311	64.5725		ILMN_1723004	CD72	63.5526	50.9213		ILMN_2381753	G3BP2	16.4761	57.2607		ILMN_2214678	MXD1	49.8537	62.0512		ILMN_2117809	DUXAP3	112.752	95.5823		ILMN_2347798	IFI6	85.629	82.6212		ILMN_1713752	SERINC3	24.0909	48.2696		ILMN_2291954	SLA	22.3924	41.8247
ILMN_2369785	SNRPD2	39.3262	30.1768		ILMN_1704446	SLC6A10P	56.5745	54.614		ILMN_1775235	AFF3	54.4439	56.3777		ILMN_2328776	MST4	20.4057	53.2694		ILMN_1810420	DYSF	41.9233	68.401		ILMN_2330495	OCIAD1	96.3843	107.93		ILMN_1742618	XAF1	85.6822	79.7963		ILMN_1751816	MCTS1	26.691	43.8499		ILMN_1756806	MCL1	8.17277	53.6359
ILMN_1712390	CUTA	31.0064	37.3984		ILMN_1759155	IFIT1L	44.0332	65.0658		ILMN_2337928	CXCR5	49.2658	55.2842		ILMN_1795128	C13ORF23	21.6522	48.415		ILMN_1668270	ZDHHC18	43.0558	66.6389		ILMN_1692145	ZNF14	109.539	92.6277		ILMN_1739428	IFIT2	89.2066	69.3458		ILMN_2044226	PPP3CA	26.4026	43.8117		ILMN_2381603	ING3	16.764	44.868
ILMN_2411723	RPSA	36.2653	30.0302		ILMN_1815527	HBD	51.1386	57.2467		ILMN_1661646	BANK1	41.3804	60.2611		ILMN_1805800	RAB5A	17.8129	52.1771		ILMN_2212763	ICAM3	45.5079	63.0078		ILMN_2249473	SPTLC1	98.7058	98.8863		ILMN_2388547	EPSTI1	73.5966	82.3794		ILMN_1679025	LOC641848	28.0389	41.9389		ILMN_1792922	SOD2	16.2022	44.9838
ILMN_1751400	SKAP1	33.6057	32.044		ILMN_1714765	LOC389599	66.429	41.3339		ILMN_1664063	FAM129C	43.9911	53.1089		ILMN_1729318	TOR1AIP1	19.4173	50.1186		ILMN_2368292	TSEN34	47.0859	59.0624		ILMN_2219618	LOC90586	110.425	85.5891		ILMN_1662358	MX1	80.0053	69.2686		ILMN_1742813	TMEM167A	23.8744	44.4771		ILMN_1737586	LOC653994	14.227	45.0771
ILMN_1703565	GLTSCR2	34.7834	30.4577		ILMN_1742410	BCL2L1	75.0861	30.6819		ILMN_1710017	CD79B	56.5538	37.4819		ILMN_1799604	OCIAD1	24.952	44.5825		ILMN_1746588	TALDO1	34.5873	69.6768		ILMN_1772492	MCART1	84.9829	103.306		ILMN_2239754	IFIT3	80.5591	53.7545		ILMN_1739583	ROCK1	25.8876	42.4241		ILMN_1667994	AMD1	7.93792	51.2307
ILMN_1744347	LOC127295	47.9863	15.3527		ILMN_1652431	CA1	41.0615	62.9302		ILMN_1778681	EBF1	42.4532	50.6271		ILMN_2410742	JMJD1C	13.9949	54.2544		ILMN_1755235	XPO6	36.9831	67.1245		ILMN_1812105	PIP5K2B	94.1182	89.2677		ILMN_1799467	SAMD9L	62.1549	68.2365		ILMN_2389844	SP3	32.5617	35.6762		ILMN_1747192	RNF125	14.8292	43.4254
ILMN_1665148	LOC648249	44.4688	17.3401		ILMN_1743911	SLC25A39	43.1571	57.779		ILMN_1668277	BLK	47.5301	42.247		ILMN_1807994	PCNP	16.5831	51.0319		ILMN_2323172	CSF3R	40.2443	58.87		ILMN_2342455	PPA2	104.825	75.808		ILMN_1674063	OAS2	66.2085	60.139		ILMN_1759954	PTMA	37.8234	28.9441		ILMN_1658460	LOC653884	9.24451	48.1717
ILMN_2154566	RPL10A	37.8651	23.6954		ILMN_2367126	ALAS2	45.3937	54.9756		ILMN_1669497	OSBPL10	37.0426	46.5536		ILMN_1700834	SLK	16.5643	50.93		ILMN_1778723	AMICA1	36.0057	62.8317		ILMN_2222101	N4BP2	77.2271	102.212		ILMN_1795181	DDX60	61.8234	62.9364		ILMN_2122374	FAM49B	40.0065	26.6109		ILMN_1701753	LOC644063	12.8774	41.9807
ILMN_2087080	RPL5	41.7964	19.7412		ILMN_1736911	TMOD1	61.6458	37.9516		ILMN_1700428	HLA-DOB	47.3985	35.9423		ILMN_1665049	SPG11	20.7514	46.7311		ILMN_1659544	STX3	47.0354	51.3745		ILMN_1671661	HSD17B7	98.5468	78.5882		ILMN_1706502	EIF2AK2	61.1898	61.4423		ILMN_2183216	TTRAP	28.9875	37.0495		ILMN_1777058	HIATL1	11.916	42.6747
ILMN_1759436	NOSIP	30.9025	30.5004		ILMN_1786328	WDR40A	64.7239	33.869		ILMN_1791329	FCRL2	29.8976	50.0701		ILMN_2247664	SON	14.9426	50.606		ILMN_1788213	FRAT2	43.5673	54.71		ILMN_2113738	C8orf45	96.8059	80.3248		ILMN_2054019	ISG15	70.963	51.5218		ILMN_1803647	FAM162A	21.1306	44.3306		ILMN_1703229	HIATL1	9.67255	44.3447
ILMN_1680437	LOC731096	37.9087	22.6982		ILMN_1811927	OR2W3	48.4503	45.4795		ILMN_1782551	E2F5	43.1284	35.6881		ILMN_1793384	JAK1	25.6011	39.4815		ILMN_1656934	REPS2	41.3386	56.3379		ILMN_2048811	NUBPL	87.8706	86.9767		ILMN_1745374	IFI35	50.8148	68.0633		ILMN_1803742	CAPZA1	31.6004	33.5251		ILMN_1653793	PDPK1	21.7884	32.1366
ILMN_1812191	C12orf57	47.3222	13.0971		ILMN_1715963	FBXO7	43.0212	50.8052		ILMN_1752899	BCL11A	48.5621	25.4441		ILMN_1715886	CNOT7	16.1732	48.1024		ILMN_1666049	NUP214	39.8363	57.3865		ILMN_2053538	RHBDL2	86.003	88.8405		ILMN_1731224	PARP9	52.1111	60.8339		ILMN_2133316	GIMAP7	26.6427	35.8481		ILMN_1810418	LBR	10.2128	42.8662
ILMN_1775243	LOC646766	35.8471	23.4695		ILMN_1705458	TRIM58	49.8723	41.8978		ILMN_1811049	POU2AF1	37.5401	35.3873		ILMN_2391551	C13ORF23	17.921	46.3431		ILMN_1665964	GAB2	47.8873	47.5481		ILMN_2168952	DENR	83.6944	90.2782		ILMN_1691731	PARP14	59.5137	45.2826		ILMN_2181540	YY1	31.917	29.9627		ILMN_2306077	USP33	11.2364	41.1144
ILMN_1671314	UXT	37.0446	22.1714		ILMN_1654118	BCL2L1	63.6205	27.7615		ILMN_2401714	MS4A1	38.1234	33.3799		ILMN_1690524	VAMP7	17.4365	46.5099		ILMN_1676358	RALB	33.7231	59.4629		ILMN_1721349	MAGT1	97.9169	74.8415		ILMN_1670305	SERPING1	42.2403	61.9658		ILMN_2344455	G3BP1	23.3654	38.359		ILMN_1664371	HIATL1	12.1511	40.1974
ILMN_1685088	RPL36	43.083	16.0999		ILMN_1671686	EPB49	54.7319	33.7767		ILMN_1676003	PNOC	29.3623	36.7848		ILMN_1764970	JMJD1C	10.3496	53.5235		ILMN_1673111	TSEN34	28.7908	64.2889		ILMN_2073543	C15orf63	95.3564	76.2144		ILMN_2349061	IRF7	55.7826	46.7678		ILMN_2301955	THAP1	22.8046	38.9079		ILMN_1737254	USP1	16.1015	35.5014
ILMN_1760280	NXT1	30.6905	28.2368		ILMN_1706434	LOC440359	56.7129	31.57		ILMN_2296950	APOBEC3F	35.2906	30.5505		ILMN_1752631	CGGBP1	22.0285	41.7521		ILMN_1651826	BASP1	42.0783	50.6383		ILMN_2194852	FLJ46309	77.3885	93.5392		ILMN_1798181	IRF7	58.6879	43.657		ILMN_1675462	LSM6	23.9028	37.5383		ILMN_1658337	AKIRIN1	17.6702	33.5076
ILMN_2309245	BIN1	37.4183	19.2963		ILMN_1745962	FBXO7	40.779	46.1693		ILMN_1761260	COBLL1	34.8689	30.6183		ILMN_2397231	USP16	19.1815	44.4806		ILMN_2363065	RTN3	37.8563	54.5694		ILMN_1805668	ZNF486	88.9189	81.3867		ILMN_1797001	DDX58	40.9325	60.8732		ILMN_1656285	METTL7A	26.022	34.8608		ILMN_1662128	ISY1	6.08212	44.0133
ILMN_1788742	LOC441246	36.758	19.6068		ILMN_1750130	GSPT1	50.2818	34.5605		ILMN_1719998	C9orf45	32.1372	33.229		ILMN_1672405	TMED7	13.5039	49.4243		ILMN_1800602	GCA	44.1327	47.2461		ILMN_2123559	FAM73A	72.2104	96.4804		ILMN_1787509	PRIC285	52.4271	47.9741		ILMN_1738150	SUMO2	34.3276	26.3488		ILMN_1753111	NAMPT	10.0053	39.7753
ILMN_1707810	RPS5	32.411	23.2642		ILMN_1694027	SESN3	45.8747	38.3465		ILMN_2099528	BTLA	30.6406	34.4075		ILMN_1700733	KIAA1370	15.7916	46.6239		ILMN_2092118	FPR1	29.7297	61.4241		ILMN_1677691	LOC648852	77.7933	88.7027		ILMN_1695404	LY6E	61.171	38.7395		ILMN_2231189	HIAT1	23.2536	37.0932		ILMN_1808768	ROCK1	18.0917	31.6259
ILMN_1801795	LOC347544	38.485	16.9277		ILMN_1733675	MPP1	60.5615	22.0599		ILMN_2414762	TLR10	32.034	30.3645		ILMN_1711792	GPBP1	20.357	42.0309		ILMN_1692754	TMEM49	32.2027	58.7597		ILMN_2230162	FLJ44124	97.2107	68.5073		ILMN_1736729	OAS2	58.6332	39.1852		ILMN_2192694	EIF3M	31.7644	27.4199		ILMN_1802761	LOC728505	8.28616	41.4156
ILMN_2050112	LOC388524	31.6279	23.7625		ILMN_1796165	GLRX5	50.9376	29.9671		ILMN_1719905	TLR10	32.3814	27.1892		ILMN_2330267	ABCE1	11.3729	50.7048		ILMN_1719344	LOC730820	37.6245	53.0592		ILMN_2415979	KIAA1751	98.6126	66.868		ILMN_1718558	PARP12	49.5374	48.2753		ILMN_2046315	GABARAPL2	14.4482	44.1261		ILMN_1748578	RAD21	21.1203	28.4861
ILMN_1710885	LOC387867	31.3665	23.7763		ILMN_1759117	XK	46.837	32.2841		ILMN_1662451	FCER2	31.1627	28.2876		ILMN_2119486	DMTF1	13.6412	48.349		ILMN_1758963	NADK	27.5721	62.9993		ILMN_1798581	MCM8	87.6064	73.9617		ILMN_1781373	IFIH1	54.787	42.6752		ILMN_2095506	SPOPL	12.9464	45.6157		ILMN_1743065	PTPLAD1	12.5314	36.8903
ILMN_1726981	VEGFB	35.8329	18.9822		ILMN_1688322	ADIPOR1	54.9533	23.4011		ILMN_1727045	RASGRP3	24.5183	34.8161		ILMN_1745076	CLINT1	20.9627	40.4802		ILMN_1721391	ATP6V0B	28.9545	61.2459		ILMN_2059173	SLC35E1	76.865	83.9443		ILMN_1696654	IFIT5	49.9309	47.429		ILMN_1768582	PPP2CB	23.7577	34.411		ILMN_1673757	CASP8	8.93541	40.3715
ILMN_1708151	LAGE3	30.0047	24.697		ILMN_1781966	OSBP2	49.1103	28.4671		ILMN_1788841	TCL1A	24.0259	33.824		ILMN_2378048	HNRPK	23.0605	37.888		ILMN_1685005	TNFRSF1A	45.8291	44.3181		ILMN_1678757	BCYRN1	65.4687	93.0315		ILMN_1674811	OASL	50.5141	43.952		ILMN_1748911	SNAP23	27.5798	30.5038		ILMN_1752741	TRIM23	12.9173	35.4759
ILMN_1674983	LOC387841	31.7506	21.9432		ILMN_1694476	HMBS	52.8186	23.5631		ILMN_2255133	BCL11A	44.2544	13.3167		ILMN_1753862	SRP54	17.4513	43.4321		ILMN_1705114	NUMB	37.1897	52.5867		ILMN_2150465	C5orf28	48.9731	109.231		ILMN_1690921	STAT2	47.6509	44.2778		ILMN_2116556	LSM5	13.2501	44.6076		ILMN_2259633	MLL5	16.8367	30.3452
ILMN_2079386	RPL22	41.8063	11.7262		ILMN_2352921	BPGM	48.796	27.2812		ILMN_1778536	BTLA	22.5035	33.2034		ILMN_2046003	ZDHHC6	20.2069	40.662		ILMN_2331266	NUMB	38.7015	49.9031		ILMN_2207505	LEP	71.3257	85.6814		ILMN_1745471	IRF9	45.4186	45.9392		ILMN_1782488	RNASEH2B	21.9994	35.817		ILMN_1763007	HIAT1	7.76006	38.9309
ILMN_1661306	LOC643433	34.6637	18.808		ILMN_2152465	PIP5K2A	51.1906	24.5127		ILMN_1792075	CD22	20.0223	32.967		ILMN_1652989	NUP160	17.1916	43.6737		ILMN_1771815	C20orf43	26.6085	60.9274		ILMN_1673421	LOC440704	68.8254	88.0838		ILMN_2410826	OAS1	45.9916	44.7383		ILMN_2402936	LOC440926	32.6941	24.6285		ILMN_1660320	LOC644739	17.4807	29.1127
ILMN_1676765	LOC390354	38.827	14.5584		ILMN_1713266	FAM46C	59.4106	14.9764		ILMN_1728107	GNG7	26.6827	24.2731		ILMN_2312275	SRP54	19.6687	40.9355		ILMN_1705302	FCGRT	25.0078	61.9746		ILMN_1713706	ZNF786	84.5503	72.3442		ILMN_1699331	IFIT1	53.9751	34.3945		ILMN_2151441	FAM103A1	24.1461	32.8909		ILMN_1697864	CXorf38	12.5284	34.0061
ILMN_1739794	CD3E	41.2991	11.9803		ILMN_2096322	ADIPOR1	54.1696	20.0478		ILMN_1776939	MS4A1	27.2177	22.2393		ILMN_1779214	ATM	11.8975	48.516		ILMN_1785005	NCF4	40.9164	45.6209		ILMN_2158164	ZNF430	90.2457	65.7509		ILMN_2170814	LAMP3	35.5017	49.6523		ILMN_1672947	CAST	23.3472	33.0902		ILMN_2239754	IFIT3	9.01073	37.2286
ILMN_1659550	LOC388654	34.2889	18.9339		ILMN_1696183	HBQ1	26.6581	44.7945		ILMN_1731742	TNFRSF13C	29.9002	18.4217		ILMN_1782609	STAG2	16.6716	43.3892		ILMN_1791771	HCK	29.8495	56.6804		ILMN_2215382	DDX51	71.0917	84.5847		ILMN_1769520	UBE2L6	40.8735	44.1786		ILMN_1756779	CLTC	22.2383	34.1408		ILMN_1721651	LOC646463	8.37764	37.5536
ILMN_1674160	BIN1	27.9306	25.0488		ILMN_1799028	TSPAN5	38.7005	31.6448		ILMN_1669881	TSPAN13	21.5727	25.4677		ILMN_1795228	ZFAND5	19.6952	40.2113		ILMN_1664012	CANT1	25.8103	60.3319		ILMN_2188119	ARL16	99.361	55.4177		ILMN_1783621	CMPK2	35.435	49.0594		ILMN_2076250	GPBP1L1	20.4712	35.6863		ILMN_2363591	SDCBP	10.946	33.4541
ILMN_2122103	ETS1	33.5319	19.2389		ILMN_2404049	RBM38	49.7075	18.411		ILMN_2369666	CR2	24.4884	22.2164		ILMN_1717337	3319228800	16.0577	43.8021		ILMN_2405797	REPS2	32.4762	52.8974		ILMN_1778202	FLJ40722	76.7876	77.4068		ILMN_1765994	ZBP1	38.7194	43.7209		ILMN_1669215	SRPK2	22.3583	33.5971		ILMN_1717063	FBXO9	10.1558	34.2147
ILMN_2087060	TOMM7	25.4339	27.3076		ILMN_1774091	FECH	42.3218	25.6882		ILMN_2129505	CYBASC3	27.2706	19.0393		ILMN_1785765	TM9SF2	16.4942	43.1542		ILMN_1666932	FCGR2A	35.3761	49.2532		ILMN_2105033	PLDN	74.0024	79.9337		ILMN_1814305	SAMD9	42.4651	39.0855		ILMN_2223720	ATMIN	17.7808	37.9487		ILMN_1806294	RPS6KA3	6.81035	37.3432
ILMN_2311989	CUTA	35.0877	17.5518		ILMN_1782788	CSDA	38.3655	28.4448		ILMN_1675406	PPAPDC1B	23.6653	21.7339		ILMN_1702835	SH3BGRL	13.1278	45.6922		ILMN_1705064	NDEL1	37.9094	45.0924		ILMN_2055310	MBD4	90.8957	62.1497		ILMN_1701114	GBP1	33.8102	47.0523		ILMN_1731137	TXNDC9	17.0055	38.4826		ILMN_1664543	IFIT3	9.46405	34.6876
ILMN_1672961	LOC652624	28.3697	23.8473		ILMN_1732049	DPM2	46.4496	19.179		ILMN_2130525	TSPAN13	24.3375	20.4077		ILMN_1654920	HNRPH3	12.1336	46.6617		ILMN_2367165	ABTB1	35.8189	46.8501		ILMN_2107004	GPR1	46.018	106.218		ILMN_1654639	HERC6	32.1034	45.002		ILMN_2171289	SAMSN1	19.7832	35.6682		ILMN_2300695	IKZF3	8.36669	35.7228
ILMN_1732328	LOC646200	33.5383	18.6594		ILMN_1806456	C14orf45	42.9392	21.9232		ILMN_1781085	BRDG1	23.1977	21.3636		ILMN_1659415	MAP2K1IP1	12.2054	46.1985		ILMN_1661439	FLOT1	31.8168	50.4717		ILMN_2152257	SSTR2	79.8424	71.2718		ILMN_1687384	IFI6	51.7467	23.2887		ILMN_2186678	C6orf211	11.7663	43.5587		ILMN_1682354	SNORD33	13.1644	30.8674
ILMN_2319994	RPL3	39.0628	12.9676		ILMN_1704079	RBM38	48.3224	12.9994		ILMN_2342271	BCL11A	16.3485	27.7008		ILMN_1800612	VBP1	13.3102	44.899		ILMN_1713934	LITAF	30.7019	51.374		ILMN_2061419	CYCSL1	68.1793	81.3059		ILMN_2053527	PARP9	43.4175	30.8613		ILMN_1729019	2012-09-07	30.1527	25.142		ILMN_1778377	ERGIC1	8.73955	35.1218
ILMN_1798728	C19orf2	31.3701	20.5229		ILMN_1749984	LOC440313	31.6388	29.6616		ILMN_1785175	SWAP70	28.0339	16.0013		ILMN_2105308	DPM1	15.5613	42.1691		ILMN_1785356	DENND5A	27.8938	54.1277		ILMN_2155322	ZNF652	86.7504	62.2724		ILMN_1675640	OAS1	33.7989	39.0397		ILMN_2050761	EIF4E	13.9589	41.3066		ILMN_1744862	TGFBR2	10.7135	33.106
ILMN_1739257	EIF3E	33.5832	17.9831		ILMN_1671583	MKRN1	45.5956	15.4854		ILMN_1707491	KIAA0125	17.4189	24.6195		ILMN_1675956	LYST	14.6032	42.7997		ILMN_1698996	SLC19A1	30.4587	51.3957		ILMN_2122511	CCBE1	78.4152	68.5378		ILMN_2148785	GBP1	34.1993	38.4715		ILMN_2057826	PHF3	15.5839	39.656		ILMN_1674633	UBE2H	10.9158	32.02
ILMN_1788607	RPL23A	35.9585	15.4373		ILMN_1784207	C1orf128	39.8669	21.0396		ILMN_1659075	HLA-DOA	25.4362	16.2508		ILMN_2189605	FAM122B	14.6831	42.5723		ILMN_1717809	RNF24	42.9462	38.7904		ILMN_2073307	IL10	77.7636	69.0979		ILMN_2231928	MX2	39.9609	32.55		ILMN_1692116	LOC650321	14.3095	40.7068		ILMN_1687724	RAP1GDS1	5.57588	37.3014
ILMN_1728132	LDHB	39.0259	12.1616		ILMN_1702447	IGF2BP2	45.8187	13.7537		ILMN_1684724	CR2	20.431	20.8299		ILMN_1788931	DOCK8	12.6535	44.4968		ILMN_2372974	SIRPA	35.094	46.4268		ILMN_2228196	C6orf170	64.4015	82.4021		ILMN_1681721	OASL	44.8565	27.2276		ILMN_1745423	UTP3	20.8201	33.74		ILMN_1666494	CRK	8.1687	33.5684
ILMN_1695576	MRPL24	23.8497	26.9945		ILMN_1777233	E2F2	52.2893	7.013		ILMN_1808783	STRBP	15.7666	24.9042		ILMN_1688158	CYB5R4	7.69424	49.3593		ILMN_1665877	RNF149	34.4642	46.9149		ILMN_2091084	C8orf37	80.7691	65.375		ILMN_1779252	TRIM22	46.7603	25.0704		ILMN_2042651	EVI2B	18.7653	35.5132		ILMN_1665332	LOC653157	11.1431	30.3724
ILMN_1752285	RPL4	40.449	10.3253		ILMN_1810785	RNF11	44.0364	15.1699		ILMN_2143314	SPIB	22.7819	17.0109		ILMN_1706094	HECTD1	14.4389	42.5956		ILMN_1667966	C1orf24	21.7261	59.6365		ILMN_2286014	CATSPER2	68.5029	77.2494		ILMN_1801307	TNFSF10	29.3136	42.4939		ILMN_1665823	LOC389787	24.7206	29.4903		ILMN_1666713	LYPLA1	7.72368	33.3575
ILMN_1789809	LOC644511	38.7525	11.7232		ILMN_2091454	HBM	27.3766	31.746		ILMN_1690907	CCR6	18.6585	20.3082		ILMN_1810759	C2ORF25	10.2213	46.7805		ILMN_1805228	LRG1	34.5223	46.663		ILMN_1654320	LOC644250	74.8391	70.6532		ILMN_2415144	SP110	30.4721	40.5		ILMN_2211672	TSNAX	17.6351	36.5413		ILMN_2074860	RN7SK	16.4835	24.0939
ILMN_2142815	RPL35	37.0466	12.7371		ILMN_2410516	PPM1A	48.8712	10.2067		ILMN_1677793	P2RX5	17.939	20.9825		ILMN_1775192	BCLAF1	14.4781	42.4531		ILMN_1736597	TKT	25.3612	55.7018		ILMN_1736008	YRDC	87.6669	57.2189		ILMN_1776723	PHF11	32.8208	36.6288		ILMN_2292387	TANK	19.0859	34.8747		ILMN_2252295	ELF2	12.869	27.681
ILMN_1662438	SOD1	30.7414	18.7674		ILMN_1697529	RNF10	46.6803	12.314		ILMN_2337931	CXCR5	23.133	15.7725		ILMN_1790909	NFE2L2	18.0602	38.6755		ILMN_2234412	TLE3	30.9431	49.5968		ILMN_2150294	FKBP14	88.6208	52.4134		ILMN_2370573	XAF1	35.7819	33.2242		ILMN_2046024	DUSP11	14.3922	39.3932		ILMN_1669727	WAC	7.34143	32.5638
ILMN_1807710	HINT1	35.4963	13.9338		ILMN_1658624	UBXN6	30.8769	27.9341		ILMN_2058468	BACH2	14.0315	24.1147		ILMN_1699112	COPB1	15.4627	40.7822		ILMN_1652490	MANSC1	29.0803	51.2522		ILMN_1755114	EIF2AK4	75.861	63.5021		ILMN_1691364	STAT1	30.3561	37.4032		ILMN_2167011	ECHDC1	18.7297	34.8676		ILMN_1794599	SNRPD3	9.45186	29.9703
ILMN_2130180	RPL13L	40.4839	8.53636		ILMN_1807201	FAM104A	44.4427	10.8652		ILMN_1662038	LARGE	15.7074	22.4031		ILMN_1679232	KIDINS220	11.1662	45.0649		ILMN_1739792	RHOG	27.3998	51.9824		ILMN_1694399	ICA1	68.2564	70.294		ILMN_2390162	PHF11	25.5226	42.1909		ILMN_2210713	COMMD8	12.7651	40.7668		ILMN_1675124	DDX17	9.20108	29.9246
ILMN_1741264	MRPS33	23.4954	25.4022		ILMN_2413537	HEMGN	33.1312	21.7638		ILMN_1659800	BCL11A	16.1561	17.7625		ILMN_1738632	PRKAR1A	20.1847	35.959		ILMN_1812915	TNFRSF10B	32.5509	46.3988		ILMN_2381537	CRCP	70.5088	66.8229		ILMN_1678422	DHX58	31.4066	36.2579		ILMN_1792138	UQCRH	22.3726	31.1208		ILMN_1747759	WSB1	6.29545	32.6951
ILMN_1812478	ZNHIT3	29.4265	19.2642		ILMN_1684255	MYL4	31.8605	22.5484		ILMN_1797822	SEL1L3	18.3928	15.2764		ILMN_2397230	USP16	12.5616	43.5621		ILMN_2391912	SEC14L1	12.5867	65.9168		ILMN_1730678	ANKRD30B	65.6544	71.6615		ILMN_1731418	SP110	27.6177	38.9548		ILMN_1719749	PTGES3	24.395	29.0438		ILMN_2327780	TRIM23	7.01198	31.678
ILMN_1760667	POLR3GL	27.3172	21.1188		ILMN_1708016	C20orf108	42.5301	11.2445		ILMN_2374352	DBNDD1	11.2338	22.1686		ILMN_1752086	C4ORF41	15.3769	40.3861		ILMN_1750101	S100A11	31.1323	47.3555		ILMN_2089175	SYAP1	81.9521	55.1589		ILMN_1683792	LAP3	28.6709	37.1268		ILMN_1672331	MAP3K7IP2	13.7963	39.467		ILMN_2296057	CASP2	5.70395	32.9263
ILMN_1655710	LOC642989	35.8441	12.5875		ILMN_1651358	HBE1	20.7394	33.0219		ILMN_1730917	KMO	21.0826	12.0756		ILMN_1653134	TMEM188	5.64853	50.0914		ILMN_1764964	IFNGR2	28.9337	49.0237		ILMN_1811221	SLC5A8	53.0677	83.4266		ILMN_1710937	IFI16	39.578	26.0145		ILMN_1785107	NXT2	15.5033	37.7362		ILMN_2311278	ADD3	10.0218	27.6811
ILMN_1689774	MRFAP1L1	34.5449	13.5205		ILMN_1690077	PPM1A	45.3418	8.4086		ILMN_1775542	FAIM3	18.9961	13.7504		ILMN_2102960	KIAA1370	14.8434	40.7275		ILMN_1741727	QPCT	35.3382	42.423		ILMN_1690114	PTPLAD2	66.0096	69.9088		ILMN_2058782	IFI27	36.2799	28.0457		ILMN_2157709	C14orf19	15.8279	37.2657		ILMN_1706523	FCGR2A	6.12572	31.3933
ILMN_1659095	LOC644029	32.3248	15.5347		ILMN_2303166	MBNL3	24.9188	28.7466		ILMN_1748123	KLHL14	13.1766	17.747		ILMN_1702301	DOCK10	11.002	44.2619		ILMN_1696187	PYGL	35.101	42.5315		ILMN_2297069	FAM115A	86.6796	48.6296		ILMN_1690105	STAT1	30.8058	33.1824		ILMN_1798448	IDS	15.7488	37.3071		ILMN_1718177	CYP20A1	11.191	26.1046
ILMN_1664614	FAU	24.8493	22.9055		ILMN_1749722	RNF213	30.7489	22.3217		ILMN_1741356	PRICKLE1	7.72329	22.2785		ILMN_1757646	UFM1	21.0663	34.067		ILMN_1784737	S1PR4	31.4156	46.187		ILMN_2105253	PTGR2	60.168	75.0732		ILMN_1777325	STAT1	24.6406	38.4656		ILMN_1679587	LOC651202	25.9112	26.5462		ILMN_1758864	VNN2	7.36003	29.6475
ILMN_1712155	RPL6	35.7841	11.9699		ILMN_1758398	GUK1	33.8986	18.9454		ILMN_1776181	BIRC3	15.1696	14.5447		ILMN_1794399	SNRK	10.7356	44.1273		ILMN_2393169	THOC5	23.0731	54.4954		ILMN_2117569	DEM1	85.8651	48.0686		ILMN_1758418	TNFSF13B	29.6634	32.9988		ILMN_2221408	ARFGEF1	19.8667	32.4426		ILMN_2358540	RBMS1	15.435	21.3821
ILMN_1654609	TIGA1	32.1777	15.4249		ILMN_1746579	UBE2O	42.206	10.6309		ILMN_1814194	TCF4	16.0643	13.347		ILMN_1696494	CMTM6	14.5891	40.2195		ILMN_2401978	STAT3	20.6929	55.7742		ILMN_2093748	ZNF669	59.9556	73.8251		ILMN_1805750	IFITM3	25.2433	35.7976		ILMN_2219712	HMGB2	22.8263	29.3838		ILMN_1772486	ELF2	10.1902	26.4926
ILMN_1695598	LOC441775	31.454	15.8984		ILMN_1728742	C5orf4	28.5988	24.1965		ILMN_1779257	CD40	16.8986	11.7982		ILMN_2363586	SDCBP	7.92445	46.8771		ILMN_1678170	MME	33.3425	43.0778		ILMN_1721204	CSF2RA	64.5764	67.7191		ILMN_1782487	LOC400759	18.2039	42.567		ILMN_2307744	CD46	18.4441	33.0778		ILMN_1669189	RASSF5	6.38098	30.1514
ILMN_2316806	RWDD1	27.9826	19.3303		ILMN_2341626	2012-03-08	39.5747	13.1868		ILMN_1732296	ID3	12.1068	16.4568		ILMN_1792997	NPTN	12.5224	42.2488		ILMN_1680397	IL8RB	32.0891	44.2835		ILMN_2079098	C9orf80	79.4808	52.2499		ILMN_1705241	TDRD7	28.886	31.1345		ILMN_2349831	DICER1	17.814	33.5634		ILMN_1734702	MANEA	6.71351	29.3849
ILMN_1746252	LOC391811	23.9968	23.1314		ILMN_1804350	LOC644852	17.0819	35.5876		ILMN_1773567	LAMA5	11.3703	16.0165		ILMN_1755303	ZNF217	10.336	44.4112		ILMN_1772131	IL1R2	25.5636	50.0002		ILMN_2243516	C11orf63	67.5326	63.3126		ILMN_2139100	SHISA5	32.5329	25.1019		ILMN_1777286	LOC388344	17.4495	33.4234		ILMN_2244009	LBH	8.34384	27.604
ILMN_1658283	RPL17	34.5093	12.5081		ILMN_1679919	ASCC2	43.1311	9.52665		ILMN_1690064	RUNDC2C	17.5055	9.76742		ILMN_2381758	G3BP2	10.4418	44.2879		ILMN_1779886	TBC1D14	23.9217	51.4252		ILMN_2220320	RPL7L1	75.2874	55.5263		ILMN_2248970	OAS2	26.8529	29.9332		ILMN_2063114	TAF1D	12.5895	38.2826		ILMN_1679383	AKIRIN1	14.1071	21.8128
ILMN_1652955	LOC648622	32.5373	14.4036		ILMN_1801175	MAP2K3	43.1183	9.04049		ILMN_1680274	LOC652694	14.6872	12.275		ILMN_2090558	C2ORF25	13.7831	40.895		ILMN_1784884	LILRB3	29.4758	45.482		ILMN_2106656	BLZF1	76.9689	52.4078		ILMN_1725700	MOV10	22.9635	33.0193		ILMN_2181241	LOC649946	31.0653	19.7036		ILMN_1696394	IL6R	10.847	24.9686
ILMN_1776678	GIMAP7	38.1069	8.74953		ILMN_1753002	RAB2B	45.6273	6.24756		ILMN_1791593	DENND5B	6.68953	20.1489		ILMN_1791478	MTPN	17.3492	37.2848		ILMN_1701134	PTEN	22.5607	52.2807		ILMN_2334243	CREB1	93.2238	35.8453		ILMN_1703108	UBE2L6	29.279	26.4752		ILMN_2182348	SMC3	13.2892	37.1802		ILMN_1660579	CRLF3	11.5028	24.3125
ILMN_1720799	TECR	28.8947	17.661		ILMN_2336335	2012-03-08	33.3718	18.4996		ILMN_2377174	SYPL1	12.1023	14.4909		ILMN_2347807	EXOC1	21.4986	33.095		ILMN_1667222	MTX1	16.5352	58.0466		ILMN_2176882	ZNF69	83.2119	45.5859		ILMN_1683678	SPATS2L	20.5402	34.5759		ILMN_1689725	RPLP1	26.4826	23.9356		ILMN_1755462	UGCGL1	6.93025	28.8664
ILMN_1793287	LOC642755	27.4055	19.1364		ILMN_1804938	GPR175	27.8002	23.6642		ILMN_1734276	PMEPA1	8.1266	18.4242		ILMN_1739967	TBK1	19.7656	34.7371		ILMN_2074748	HAL	26.3226	48.0623		ILMN_2357386	FKTN	75.8963	52.1416		ILMN_1690241	BATF2	21.7719	32.8314		ILMN_1703005	IFP38	24.4791	25.736		ILMN_1676385	PAK2	5.89948	29.8349
ILMN_2219134	RPS15	26.9624	19.5708		ILMN_1804509	DPYSL5	17.1036	33.7412		ILMN_1684445	FCRL5	9.77396	16.5011		ILMN_1655622	PRKRIR	12.9902	41.1913		ILMN_2049727	C20orf111	21.7034	52.6544		ILMN_2047885	PCDHB9	58.0399	69.819		ILMN_1791759	CXCL10	26.8451	27.7037		ILMN_1731048	TLR1	17.5071	32.3962		ILMN_2365091	FCAR	10.0404	25.677
ILMN_1746565	CD6	34.7209	11.6028		ILMN_1772731	HAGH	34.5993	16.1015		ILMN_1670695	BACH2	12.058	13.752		ILMN_1765860	DOCK11	10.7251	43.3783		ILMN_1671893	CHMP2A	25.5139	48.5433		ILMN_1743476	LOC653829	46.5994	81.1821		ILMN_2066858	TNFSF13B	28.0116	26.1669		ILMN_2048822	NUDCD2	13.2734	36.4804		ILMN_2361186	PHF20L1	11.9364	23.7543
ILMN_1712944	AES	37.5341	8.60382		ILMN_1733581	C16orf35	26.1347	24.4523		ILMN_1699644	2012-03-03	8.24692	17.4898		ILMN_1705907	NUP153	13.0629	40.9201		ILMN_1678939	VNN2	29.039	44.9103		ILMN_1750093	SDHALP1	76.5023	50.8994		ILMN_2114568	GBP5	20.0932	33.7766		ILMN_2124155	ATP11B	18.0403	31.6176		ILMN_1723536	USP33	9.08851	26.5576
ILMN_1730077	RPUSD2	24.3605	21.3147		ILMN_1790534	MAP2K3	36.771	13.752		ILMN_1690223	CNTNAP2	5.54701	20.1236		ILMN_1679268	PELI1	11.1119	42.8286		ILMN_2414027	CKLF	27.6892	46.103		ILMN_2161286	FAM40B	60.8829	66.2426		ILMN_2173975	RTP4	21.7375	32.0276		ILMN_1689142	UBE1C	10.3836	39.2007		ILMN_1794588	DYRK2	9.20183	26.3828
ILMN_1695025	CD2	25.5728	20.0184		ILMN_1657932	MUC6	17.7481	32.4934		ILMN_1780582	CD83	16.9504	8.23298		ILMN_2047206	TXNDC10	15.5416	38.1132		ILMN_1679195	C20orf24	23.5194	50.2086		ILMN_1701314	LOC399900	90.174	36.7506		ILMN_1751886	REC8	26.8366	25.0882		ILMN_2373556	SPAST	9.83646	39.7205		ILMN_1686388	LOC644330	7.03563	28.1719
ILMN_1749709	NDUFB11	25.4348	20.1387		ILMN_1720373	SLC7A5	41.621	8.56746		ILMN_2328666	CD83	17.8762	6.94991		ILMN_2351298	WIPF1	19.1895	34.4308		ILMN_1712389	CKLF	25.2533	48.3212		ILMN_1778457	IL18	71.1112	55.3177		ILMN_1701455	FBXO6	20.3631	30.1348		ILMN_1685378	LOC728973	26.5442	22.9795		ILMN_1658992	DPM1	10.8089	24.3756
ILMN_1777378	COMMD6	26.3264	19.2308		ILMN_1808202	C19orf22	29.5996	20.0248		ILMN_1812721	LOC728014	11.5642	13.1204		ILMN_1810977	CDV3	12.0867	41.1845		ILMN_1696466	ROPN1L	23.4707	49.9978		ILMN_1812640	AHR	73.2567	52.4234		ILMN_1701621	SCO2	23.2274	26.4755		ILMN_1677262	LOC388621	19.395	30.1257		ILMN_1716876	MED27	5.51707	29.2929
ILMN_1651228	RPS28	27.9537	17.33		ILMN_1666306	SRRD	40.8842	8.57235		ILMN_1759075	TNFRSF13B	9.92005	14.7003		ILMN_1783684	LOC648695	13.0687	40.1883		ILMN_1653871	NAMPT	35.7751	37.5509		ILMN_2204909	XRCC2	83.1587	42.2629		ILMN_1678054	TRIM21	25.4008	24.1929		ILMN_2176037	GNA13	22.6837	26.7162		ILMN_1662129	RCN2	5.85181	28.834
ILMN_1760714	RPS3	33.3545	11.9213		ILMN_1668039	GYPC	19.4817	29.9535		ILMN_1682567	CCDC106	12.041	12.3169		ILMN_1718807	SMC3	8.55831	44.6542		ILMN_1661002	RFWD2	22.7182	50.3488		ILMN_2078547	HSPC268	75.5731	49.7759		ILMN_1751079	TAP1	24.1278	24.9461		ILMN_1657790	SFRS11	12.4072	36.9876		ILMN_2280911	VPS41	6.18135	28.3764
ILMN_2181241	LOC649946	33.3796	11.7902		ILMN_1702055	ROPN1B	30.6805	18.2769		ILMN_1655469	TSPAN3	14.2935	10.0214		ILMN_1741477	SMAD4	19.1534	33.8625		ILMN_1667319	LPPR2	29.3125	43.6563		ILMN_2130078	CDKN2AIPNL	81.5713	43.5072		ILMN_1732534	CHMP5	28.3511	19.524		ILMN_2342033	F11R	21.8348	27.4804		ILMN_1768969	LBR	13.2997	21.2181
ILMN_1811063	LOC649447	27.7798	17.3611		ILMN_1765208	GLUL	32.5024	16.1962		ILMN_1790549	TSPAN3	14.9609	8.59245		ILMN_1784753	PAIP2	10.6466	42.2763		ILMN_1766425	REPS2	28.4214	44.4718		ILMN_2093389	SNAPC1	54.1129	70.718		ILMN_1709333	OAS2	29.9312	17.8459		ILMN_1672565	RG9MTD1	15.1208	33.895		ILMN_1658798	MEGF9	9.02006	25.1203
ILMN_1656662	LOC731365	23.7191	21.3945		ILMN_1802808	LOC654103	41.8288	6.4872		ILMN_1716272	KBTBD8	16.6187	6.85113		ILMN_2374293	DYRK1A	18.9534	33.9328		ILMN_1724533	LY96	25.6969	46.7584		ILMN_1814039	LOC653086	70.2888	53.9493		ILMN_1723480	BST2	29.4931	18.2072		ILMN_2196347	CDKN1B	15.4272	33.156		ILMN_1777461	CCR2	6.19202	27.9464
ILMN_1694398	EIF3F	22.874	22.2033		ILMN_1669663	BCR	33.497	14.0449		ILMN_1777261	FAM3C	13.3454	10.0464		ILMN_2111918	C14ORF135	11.1491	41.6803		ILMN_1758146	SIRPA	34.862	37.4894		ILMN_2401906	CDAN1	68.7565	54.4863		ILMN_1758250	TRAFD1	15.3666	31.587		ILMN_1691395	ZBTB11	16.2747	32.1694		ILMN_1670878	YTHDC1	5.55099	28.5577
ILMN_1737947	LSM5	27.173	17.7862		ILMN_2156267	EIF2AK1	30.857	16.3777		ILMN_1764087	SYPL1	13.8237	9.4375		ILMN_1695509	PTPN12	11.9862	40.8348		ILMN_2289849	FCGR2A	26.3754	45.7757		ILMN_1688490	PTP4A2	52.883	69.8235		ILMN_1724493	LYSMD2	19.8925	25.6667		ILMN_1781039	VPS26	13.7241	34.6587		ILMN_1733249	GNB4	13.2348	20.8677
ILMN_1660832	LOC285053	31.3459	13.6022		ILMN_1783156	LOC650832	30.6907	16.4516		ILMN_1789505	ITPR1	7.36577	15.2236		ILMN_2141941	TOR1AIP1	14.1484	38.6346		ILMN_1761566	C5orf32	23.0105	49.0667		ILMN_1815578	ZNF223	59.2422	63.437		ILMN_2320964	ADAR	28.1367	17.3211		ILMN_2365196	PDCD10	13.7616	34.5482		ILMN_1680397	IL8RB	10.9054	22.9866
ILMN_1656287	SPOCK2	34.5474	10.3988		ILMN_1801313	SIAH2	34.9315	11.9446		ILMN_2329914	SPRY1	8.71915	13.8452		ILMN_2263718	SPAG9	10.3786	42.2603		ILMN_2060115	SORL1	27.7934	44.2232		ILMN_2316974	LILRB1	75.4138	47.1255		ILMN_1745148	ZNFX1	18.72	25.9343		ILMN_1809400	FAM49B	24.9088	23.3011		ILMN_2415898	DNAJB14	6.29176	27.1686
ILMN_1658289	WDR54	25.4487	19.2024		ILMN_1743046	SERPINA13	17.6928	28.7981		ILMN_2368773	FAM3C	16.6993	5.69933		ILMN_2149766	APPBP2	14.957	37.5677		ILMN_2283388	C20orf24	24.3151	47.4759		ILMN_1711073	LOC653489	66.2768	56.1722		ILMN_1774077	GBP2	18.8845	25.5359		ILMN_1698100	ANXA2P1	14.3329	33.5146		ILMN_1743594	UBXN7	5.92634	27.3745
ILMN_1776104	NDUFS5	27.6611	16.8489		ILMN_2174884	XPO7	37.7136	8.76851		ILMN_1810852	LAMC1	7.44507	13.9184		ILMN_1705114	NUMB	8.82632	43.6426		ILMN_2094061	IMPA2	25.0486	46.4983		ILMN_2180929	SLC16A12	81.0247	41.1736		ILMN_1801246	IFITM1	26.2838	17.0755		ILMN_2091846	FTHL2	16.4924	31.3259		ILMN_1807181	BACH1	8.34498	24.8147
ILMN_2335604	SKAP1	25.6483	18.2302		ILMN_1784678	PBX1	29.5685	16.3021		ILMN_1693242	ZNF296	11.4748	9.31258		ILMN_2285112	FBXO11	21.7095	30.7077		ILMN_2345512	PPP4R1	19.8036	51.6905		ILMN_2051408	PNPT1	62.202	59.3591		ILMN_1686664	MT2A	16.8647	26.4885		ILMN_1695899	LOC648659	7.40046	40.3885		ILMN_2411915	ATG4B	6.62556	26.3118
ILMN_1700674	LOC728481	34.3742	9.30707		ILMN_2379520	HAGH	34.0266	11.7846		ILMN_1664631	ADAM28	5.50845	15.0443		ILMN_1798886	NUDT21	13.6738	38.7086		ILMN_1787705	ATP6V1B2	30.2951	40.7778		ILMN_2180519	LOC729603	81.5844	39.8614		ILMN_1774874	IL1RN	21.8337	19.8809		ILMN_1657153	ACTR3	22.9719	24.7467		ILMN_2379326	MAP3K7	8.36349	24.4978
ILMN_2067656	CCND2	25.2695	18.3955		ILMN_2048607	ANKRD9	30.1808	14.9329		ILMN_1666594	IRF8	13.7172	6.77953		ILMN_1748291	C1ORF55	9.39493	42.5259		ILMN_1707312	NFIL3	39.5118	31.3915		ILMN_2097410	DAPP1	67.9854	53.264		ILMN_1785732	TNFAIP6	17.2127	23.9173		ILMN_1807945	ANP32A	21.1971	26.0074		ILMN_1713668	TSNAX	10.8561	21.8549
ILMN_2067370	SNRPF	31.1079	12.3757		ILMN_1682332	GYPC	18.8114	24.7889		ILMN_1716988	OPN3	8.1136	12.1839		ILMN_1809583	CREBBP	6.17219	45.7384		ILMN_2336781	SOD2	26.5151	44.2472		ILMN_2049364	FAM119A	76.2274	44.5499		ILMN_1771385	GBP4	16.4642	24.5279		ILMN_1785821	TTRAP	13.5387	33.5518		ILMN_1670532	GMCL1	8.8963	23.5787
ILMN_1769277	LOC651436	32.5085	10.8139		ILMN_1671693	C18orf10	30.6703	12.6408		ILMN_1686152	GGA2	13.5728	6.28186		ILMN_1811367	MAT2B	10.0536	41.6364		ILMN_1690125	PDLIM7	25.0783	45.3484		ILMN_1785703	LMOD3	78.0527	42.0855		ILMN_2284998	SP100	19.4527	21.2146		ILMN_2124757	RPL23AP13	12.536	34.4957		ILMN_1690476	QKI	13.2329	19.0063
ILMN_1699931	HCST	19.8956	23.2605		ILMN_1712914	SEMA6B	30.5174	12.7482		ILMN_2224444	SNX25	6.6889	12.0913		ILMN_1702247	CCNDBP1	8.28227	43.3584		ILMN_1695157	CA4	32.3016	37.822		ILMN_2279834	ZNF483	78.1814	41.5117		ILMN_1786612	PSME2	19.194	21.4718		ILMN_2130180	RPL13L	23.4749	23.4971		ILMN_2286514	GTPBP8	9.97995	22.2469
ILMN_1796407	SS18L2	22.0229	21.0085		ILMN_2404135	RIOK3	35.5613	7.65421		ILMN_2095273	KIAA1407	6.19812	12.5763		ILMN_1770803	BNIP2	9.55124	41.9605		ILMN_2371280	CSF3R	36.7256	33.3885		ILMN_2227495	ZNF549	83.4323	35.8885		ILMN_1724139	TMEM123	19.681	19.3513		ILMN_2180606	NAT13	18.3333	28.5796		ILMN_1776788	C5orf41	11.3155	20.7583
ILMN_1792538	CD7	30.0492	12.9662		ILMN_1694325	NFIX	36.0022	6.74502		ILMN_2196550	C13orf18	12.4973	6.19473		ILMN_1801822	C18ORF25	16.0676	35.4162		ILMN_1680996	ALOX5	34.401	35.4553		ILMN_2383107	VPS41	62.7489	56.2395		ILMN_1776777	ADAR	25.7816	12.7045		ILMN_1724295	LOC643007	14.0444	32.8347		ILMN_2385220	DFFA	11.4339	20.4103
ILMN_1683447	LOC440737	28.1978	14.8052		ILMN_1721901	CTNNAL1	19.9565	22.7728		ILMN_1697220	NT5E	10.9376	7.62346		ILMN_1713682	FBXO11	17.2925	34.0543		ILMN_2142752	MANSC1	28.3604	41.381		ILMN_2049343	LOC642947	89.8074	28.6715		ILMN_1689734	IL1RN	24.1965	14.208		ILMN_2187830	CCNH	15.4516	31.2636		ILMN_1652650	SH3KBP1	7.93396	23.8172
ILMN_1746485	LOC645899	28.4691	14.5282		ILMN_1709092	ABCC13	34.3155	8.40138		ILMN_1773388	C13orf18	10.9252	7.08499		ILMN_1732985	PHF20L1	12.858	38.4083		ILMN_1675939	IFNGR1	29.3224	40.2391		ILMN_1709164	RUNDC2C	41.5152	75.9708		ILMN_2326509	CASP1	14.7212	21.5123		ILMN_1727738	RAB33B	24.1215	22.4989		ILMN_1778803	ZFAND6	8.3218	23.3955
ILMN_1801766	CCDC109B	26.8719	15.7729		ILMN_2047112	RP11-529I10.4	28.2692	14.3118		ILMN_2117323	PIK3C2B	6.22762	11.4586		ILMN_1801383	SMG1	18.7348	32.5242		ILMN_2285802	SEC14L1	9.99203	59.2566		ILMN_1671039	GALNT3	46.2078	70.5413		ILMN_1691156	MT1A	11.2758	24.7985		ILMN_2067607	TMEM106B	13.0984	33.438		ILMN_2228044	TBC1D23	5.65981	25.268
ILMN_1694057	EIF3K	25.0235	17.5562		ILMN_1805561	SLC14A1	31.0626	11.436		ILMN_1679797	ADARB1	10.3216	7.01928		ILMN_1747630	DEK	13.5756	37.6592		ILMN_1696494	CMTM6	27.7026	41.5274		ILMN_1814204	C21orf55	75.2628	41.404		ILMN_2109708	ECGF1	15.6656	19.6664		ILMN_1724474	CARD16	11.8829	34.516		ILMN_1790533	PHACTR2	9.17234	21.6193
ILMN_2110167	POLR1E	19.1426	23.3596		ILMN_1668411	FHL2	31.5884	9.61989		ILMN_1703891	TBC1D9	9.44194	6.54406		ILMN_1763260	HIF1A	10.1838	41.0381		ILMN_1798977	GPR97	27.4299	41.7892		ILMN_2370135	HNRNPU	72.803	43.716		ILMN_1665291	NUB1	14.8224	20.424		ILMN_1704385	LOC347376	25.4675	20.8067		ILMN_1664750	TMBIM4	9.30441	21.4087
ILMN_1661917	LOC644039	22.83	19.6532		ILMN_1776519	RAP1GAP	16.1004	24.9116		ILMN_1664434	TCF3	9.09489	6.82716		ILMN_1675186	ME2	11.3758	39.8289		ILMN_1716524	RAB7A	23.1191	45.9225		ILMN_2210386	TMEM17	83.3396	33.0753		ILMN_1703263	SP140	12.1014	23.002		ILMN_2335198	NCOA1	14.2695	31.7921		ILMN_2322842	PPHLN1	8.26095	22.2271
ILMN_1694587	EEF1B2	36.2597	6.21496		ILMN_2049417	TMEM86B	34.2017	6.80159		ILMN_1656560	PARM1	6.56428	9.34195		ILMN_1654497	ATAD1	7.94597	43.2482		ILMN_2363106	RBM23	23.4629	45.1941		ILMN_1738482	CEP27	66.2931	50.0866		ILMN_1778599	SP140	9.59211	24.911		ILMN_1651228	RPS28	19.3769	26.4769		ILMN_1703688	RASA2	9.31988	21.0389
ILMN_1672417	PTPRCAP	28.9099	13.4618		ILMN_2387385	IGFBP1	17.3459	23.5781		ILMN_1789384	QSOX2	7.38231	8.41211		ILMN_1741200	RFX5	19.0759	32.1115		ILMN_1744508	FAM53C	42.1841	26.3094		ILMN_2134381	C14orf85	74.1416	41.6938		ILMN_2261600	FCGR1B	12.2162	22.2469		ILMN_2336647	NNT	15.3614	30.2288		ILMN_1812327	RNF19A	8.9651	21.3136
ILMN_1807074	MIF	25.9397	16.2076		ILMN_2413064	ST6GALNAC4	32.8878	7.87147		ILMN_2381064	TPD52	6.98867	8.70218		ILMN_2088172	POLR2B	12.2877	38.2419		ILMN_2112988	NCF1C	26.4862	41.9445		ILMN_1795697	PTP4A2	52.7388	61.3767		ILMN_2176063	FCGR1A	12.444	21.6765		ILMN_2202481	UBLCP1	21.7817	23.5383		ILMN_1697567	TPM3	9.6282	20.0627
ILMN_2323048	ERP29	18.4267	23.6576		ILMN_1733947	FKBP8	32.6638	8.05879		ILMN_1740493	TRAF5	8.50951	7.00724		ILMN_2339825	YME1L1	13.9268	36.2951		ILMN_1797895	FFAR2	20.4117	47.9733		ILMN_2321931	DCLRE1C	48.1853	65.5744		ILMN_2246882	SP140	10.3911	23.3946		ILMN_1803788	LGALS3	15.9192	29.3211		ILMN_1760347	SRGN	6.12462	23.5294
ILMN_2383097	RPL17	26.098	15.4136		ILMN_1670000	DCAF6	26.28	13.2825		ILMN_1802100	ADAM28	8.09564	7.17726		ILMN_1685415	HBP1	9.72144	40.4883		ILMN_1781416	FRAT1	22.1355	45.9511		ILMN_2115949	ZNF394	75.2573	37.6353		ILMN_1799848	ANKRD22	10.5786	22.7274		ILMN_1815292	RPL7	24.7448	20.4414		ILMN_1718815	SLTM	6.65218	22.906
ILMN_1726239	TBCA	24.368	17.1429		ILMN_2367258	SMOX	23.5327	15.9123		ILMN_2276290	RALGPS2	7.88163	7.37073		ILMN_1712019	ANKRD17	5.90045	44.294		ILMN_1772359	LAPTM5	16.3115	51.6909		ILMN_1727165	LOC644852	46.0194	66.6129		ILMN_1745242	PLSCR1	18.0918	14.99		ILMN_2389155	UGP2	24.8156	20.3265		ILMN_1703337	LOC441763	14.6526	14.7712
ILMN_2230624	RPL18	26.7811	14.6629		ILMN_1795419	C2orf24	30.9267	8.32325		ILMN_1708798	EAF2	7.85726	7.24471		ILMN_1676846	ABCE1	6.04201	44.1315		ILMN_1802096	ABTB1	34.3144	33.6694		ILMN_2211724	C21orf24	62.3255	50.2245		ILMN_2404665	TRIM5	13.9794	18.9965		ILMN_1689371	GIMAP2	14.9114	30.2224		ILMN_1687519	SNAP23	7.66788	21.6338
ILMN_1659405	LOC653773	32.6193	8.57174		ILMN_2323427	EPB41	31.3666	7.44036		ILMN_1726981	VEGFB	5.86742	8.07831		ILMN_1736796	RB1CC1	9.51251	40.3213		ILMN_1698766	PYCARD	15.6914	52.2088		ILMN_2397484	GJC1	72.1716	40.2912		ILMN_1788017	HSH2D	17.5469	15.1964		ILMN_2168992	FBXO30	14.0678	31.0397		ILMN_2324994	IKBIP	6.86402	22.2602
ILMN_1655422	RPL17	27.1236	14.0054		ILMN_1704842	ARL4A	27.5789	11.1722		ILMN_1811636	IFT57	7.03919	6.86682		ILMN_1754839	DHX15	12.5803	37.2099		ILMN_1805192	ITPRIP	36.3889	31.3977		ILMN_1761277	PDE4C	78.6175	33.4		ILMN_1659913	ISG20	10.9094	21.3581		ILMN_1763539	IER3IP1	16.0805	28.8793		ILMN_1693401	KLHL28	8.96085	19.9982
ILMN_1661170	NDUFB8	15.8477	25.054		ILMN_1749662	GPX1	30.0928	8.39853		ILMN_2382309	TCL1B	7.42088	6.33907		ILMN_1698001	NCK1	12.0632	37.6239		ILMN_1737314	BCL6	35.5215	32.207		ILMN_2404795	SULT1A1	60.5097	50.4228		ILMN_2391051	FCGR1B	13.3925	18.8523		ILMN_1785661	FAM108B1	13.6484	31.3102		ILMN_1661343	TNFSF14	14.7047	14.1242
ILMN_2160388	RPL24	24.9261	15.8191		ILMN_1724700	RIOK3	29.9156	8.53455		ILMN_1742544	MEF2C	7.46094	6.19416		ILMN_2173004	RAB8B	9.65573	39.9233		ILMN_1755873	EMR3	19.848	47.8695		ILMN_2091123	HCG2P7	64.6937	45.5999		ILMN_1724837	ZC3HAV1	12.9577	18.8938		ILMN_1712766	ERGIC2	18.4017	26.4894		ILMN_1652198	CCM2	9.43906	19.2019
ILMN_1673991	ATIC	27.8323	12.5898		ILMN_1672024	ISCA1L	30.2207	7.83073		ILMN_1808059	BCAS4	5.73018	6.6375		ILMN_1807925	GNG2	9.86302	39.6438		ILMN_1766045	SH3GLB1	15.5305	52.0112		ILMN_2246548	GSTTP2	35.6114	74.3221		ILMN_2262044	PARP10	17.0029	14.3109		ILMN_2120917	CTR9	16.1607	28.5688		ILMN_1703132	LYRM2	7.02138	21.4898
ILMN_1672755	LOC649548	19.5275	20.8121		ILMN_1794074	MXI1	29.8296	8.11327							ILMN_1803279	TMED5	12.6118	36.8905		ILMN_2362858	PILRA	20.1672	47.0174		ILMN_2405684	BIRC3	49.0171	60.4271		ILMN_1724333	TOR1B	12.8766	18.3517		ILMN_2070940	CD302	11.9204	32.7459		ILMN_2324989	IKBIP	6.54202	21.8005
ILMN_1726169	EDF1	24.8778	15.4343		ILMN_1703142	2012-03-02	23.4449	14.0901							ILMN_1692276	GGPS1	15.2614	34.173		ILMN_1740864	TREML2	27.4472	39.3159		ILMN_1653412	RAXL1	50.7099	58.3466		ILMN_2193591	UNC93B1	17.3788	13.7523		ILMN_1733453	LOC284988	11.102	33.4578		ILMN_1686283	CECR1	8.50903	19.6624
ILMN_1693145	BUB3	30.6886	9.39881		ILMN_1791039	RTF1	17.1428	20.2057							ILMN_1760360	ZNF294	14.1242	35.2977		ILMN_1711994	TCIRG1	15.783	50.9798		ILMN_1783060	SLC25A20	45.1752	63.7194		ILMN_1758831	RNF31	11.8528	19.193		ILMN_2129715	COG3	10.3331	33.9743		ILMN_1733559	LOC100008589	19.856	8.12801
ILMN_1765684	C19orf70	19.8709	19.9476		ILMN_1678919	YOD1	27.643	7.63015							ILMN_1765644	COMMD8	10.3088	39.0884		ILMN_1813489	RAF1	30.1281	36.4925		ILMN_2376458	CSF2RA	56.0071	52.2759		ILMN_1728019	PML	9.99297	21.012		ILMN_2076602	ITM2A	18.0962	25.9728		ILMN_1735594	CDC42SE2	6.0912	21.8876
ILMN_2355033	KIAA1147	22.0852	17.6007		ILMN_1715969	SLC25A37	27.4167	7.77791							ILMN_1661799	HIGD1A	9.99276	39.1816		ILMN_1775498	FAM100B	19.494	47.0911		ILMN_2346137	ZNF557	44.7392	63.1223		ILMN_1806017	PSME1	10.2378	20.7332		ILMN_1802906	LOC646900	10.8635	33.0067		ILMN_1728677	CREB5	7.44646	20.4709
ILMN_1751726	LOC649049	32.7307	6.93798		ILMN_1775011	NOL10	28.0392	6.57113							ILMN_1664560	DYRK1A	12.7342	36.4162		ILMN_2408001	RFWD2	21.3504	45.1784		ILMN_2274775	SLC44A4	58.1673	48.4718		ILMN_1740466	FAM46A	19.1492	11.6881		ILMN_1755115	RPL23	25.1709	18.3839		ILMN_1684346	TNFAIP8L1	10.1124	17.6302
ILMN_1750507	RPL9	26.0574	13.3364		ILMN_1762436	UBB	17.393	16.8747							ILMN_2389151	UGP2	14.0051	35.0461		ILMN_1766275	PIK3CD	28.9777	37.5168		ILMN_2078724	C14orf153	66.1307	39.9353		ILMN_2132599	ANKRD22	8.08426	22.7434		ILMN_1743187	C6orf120	12.6456	30.5804		ILMN_2269564	ARID4B	10.3062	16.96
ILMN_1652073	LOC653658	28.2997	10.9496		ILMN_1762189	LOC387686	18.8688	15.2538							ILMN_2048636	ME2	9.00733	39.7185		ILMN_1815086	NINJ1	26.9081	39.5262		ILMN_2082893	LOC440157	47.8284	57.9742		ILMN_1672661	SP110	21.7874	9.02087		ILMN_1692948	CCDC90B	7.85297	35.3171		ILMN_1765208	GLUL	5.89073	21.3229
ILMN_1678165	LSM7	22.2737	16.9722		ILMN_1749834	LOC388588	16.5565	17.2033							ILMN_2128668	FOXJ3	13.9546	34.6497		ILMN_1769705	LOC440093	19.5869	46.7675		ILMN_2270845	WDR74	27.6967	77.6328		ILMN_1729973	ZC3HAV1	8.85975	21.6467		ILMN_2041101	ANXA2P1	16.8643	26.3002		ILMN_1690754	SVIL	11.6886	15.3521
ILMN_2222984	RDH14	19.6388	19.5533		ILMN_2165993	ITLN1	17.3533	16.24							ILMN_1718946	ADAM10	19.9152	28.4133		ILMN_2075927	STK40	28.1916	38.1601		ILMN_1756152	MFSD11	45.4389	59.0063		ILMN_1710844	PARP10	14.4285	15.7729		ILMN_1687036	MRPL47	16.3152	26.8265		ILMN_1801584	CXCR4	9.91062	17.0581
ILMN_1663416	LOC642250	26.1826	12.9871		ILMN_1733963	ADRA2C	13.3525	19.6134							ILMN_1688698	ZEB2	7.54321	40.727		ILMN_1702396	PACSIN2	20.7346	45.5832		ILMN_2235745	GRIPAP1	70.356	34.074		ILMN_2326512	CASP1	9.22946	20.8215		ILMN_1772814	NLK	7.80092	35.3386		ILMN_2374234	PRKACB	6.18074	20.4574
ILMN_1768958	RASGRP1	28.6649	10.4521		ILMN_2136446	CTNNAL1	18.9975	13.5751							ILMN_1693310	ITFG1	15.2058	32.9501		ILMN_1765941	GPR97	26.8791	39.4037		ILMN_2118472	C10orf58	55.293	47.775		ILMN_1733998	DHRS9	14.9972	14.4088		ILMN_1671372	LOC137107	8.74393	34.3502		ILMN_1677466	DUSP6	10.7977	15.7276
ILMN_1786658	BOLA3	26.5291	12.5277		ILMN_1775380	SMOX	17.7186	14.7054							ILMN_1761120	TM2D3	12.2379	35.7593		ILMN_1681239	MYO1F	22.3326	43.8418		ILMN_2273224	SLC4A5	48.1943	54.618		ILMN_1658247	OAS1	19.7426	9.37335		ILMN_1698487	SDHD	21.6971	21.3373		ILMN_1704236	MAX	9.22715	17.1897
ILMN_1679800	BRIX1	22.2244	16.7472		ILMN_1702120	NDUFAF3	8.74318	22.743							ILMN_2413259	SOCS4	15.2822	32.6735		ILMN_1729915	PILRA	26.9852	39.0655		ILMN_1711156	LOC645895	78.9116	22.788		ILMN_1721411	PARP10	14.4119	14.241		ILMN_2156953	ZFAND6	19.4596	23.555		ILMN_1793559	C6orf204	8.76176	17.5948
ILMN_2341793	CCT7	17.6906	21.1647		ILMN_2231051	TCP11L2	22.3985	8.62723							ILMN_1719343	WDR26	10.0416	37.8678		ILMN_1716105	NLRP12	30.733	35.2433		ILMN_2123312	LRAP	71.0862	29.5294		ILMN_1687201	APOL6	9.35797	19.131		ILMN_1769229	BCL2A1	10.8745	32.1329		ILMN_1781155	LYN	7.91345	18.3838
ILMN_1671374	C19orf53	25.0955	13.682		ILMN_1775405	ARL4A	12.3076	17.9673							ILMN_2100689	MAP2K4	12.7724	34.5817		ILMN_1654516	TMEM120A	24.4037	41.5469		ILMN_2233050	PLA2G2D	63.6564	36.0756		ILMN_1690939	ECGF1	10.9352	17.1829		ILMN_1782459	OSBPL8	15.4929	27.5037		ILMN_2194627	GMCL1	7.96896	18.1425
ILMN_1674069	TOMM7	22.09	16.5878		ILMN_1721651	LOC646463	22.8008	7.41004							ILMN_1766408	CBFB	11.1518	36.0627		ILMN_1757361	NCF4	23.3333	42.5927		ILMN_2276758	POFUT1	39.3275	60.3652		ILMN_1727271	WARS	9.90327	17.7144		ILMN_1659405	LOC653773	24.4654	18.522		ILMN_1717197	CD3G	9.49154	16.4399
ILMN_1656962	LOC401019	19.2663	19.2754		ILMN_1672605	C7orf41	11.743	17.9688							ILMN_2159322	SLK	7.46069	39.5415		ILMN_1717207	MMP25	29.0905	36.7746		ILMN_2051900	EID2B	59.7782	38.5576		ILMN_1733276	CYSLTR1	11.8522	15.7066		ILMN_1756860	TXNL1	13.4003	29.5369		ILMN_1857915	LOC401397	5.67984	20.0584
ILMN_1752591	LEPROTL1	28.6144	9.72387		ILMN_1705982	LOC645284	13.8656	15.535							ILMN_2185563	ANKRA2	10.3223	36.659		ILMN_1793934	PISD	28.0311	37.598		ILMN_2206188	SHROOM4	70.6065	27.4611		ILMN_2384181	DHRS9	12.9149	14.641		ILMN_1781764	HNRNPH2	13.4076	29.3838		ILMN_1668979	DNAJB14	8.85599	16.8619
ILMN_1688279	PVRIG	26.2214	12.0971		ILMN_2267787	HPS1	22.7174	6.65439							ILMN_1674522	HIGD1A	8.01504	38.8591		ILMN_2387599	C20orf24	23.9379	41.2522		ILMN_2212823	ZNF577	60.0005	37.8979		ILMN_1798827	SRBD1	11.1734	16.2364		ILMN_2362293	FBXO38	9.66595	33.1134		ILMN_2414325	TNFAIP8	6.21732	19.2702
ILMN_2207533	RPS17	26.2013	11.9069		ILMN_1681703	FOXO3	19.6366	9.65097							ILMN_1693668	KIAA0261	14.2328	32.6042		ILMN_1715273	PICALM	22.5351	42.6386		ILMN_1699383	POLR2J4	28.3965	68.4603		ILMN_1659688	LGALS3BP	9.40824	17.8267		ILMN_2062524	RBBP4	10.4343	32.3088		ILMN_1681101	2012-03-01	11.3555	14.1071
ILMN_1709880	RPLP0	26.7287	11.3404		ILMN_2390974	DNAJB2	22.6302	6.20972							ILMN_1713143	MRPL3	5.62287	41.1402		ILMN_1732575	SEC14L1	22.6449	42.4907		ILMN_2106265	GDPD1	44.7273	51.9816		ILMN_2390299	PSMB8	9.2688	17.787		ILMN_1703622	PPIB	11.67	31.0319		ILMN_1769705	LOC440093	7.19755	18.2437
ILMN_1755115	RPL23	31.4062	6.52284		ILMN_1716687	TPM1	17.085	11.5273							ILMN_1809400	FAM49B	11.9835	34.7651		ILMN_1667371	SLA	30.168	34.9161		ILMN_2285713	TDP1	61.8355	34.3743		ILMN_2112301	DRAP1	16.2857	10.7631		ILMN_1792997	NPTN	19.2655	23.3568		ILMN_1772489	SDCCAG1	8.73424	16.6557
ILMN_1780699	THAP11	26.7749	11.1349		ILMN_2360710	TPM1	15.6316	12.3564							ILMN_2388466	TIA1	15.9241	30.5326		ILMN_1800897	NRD1	16.7684	48.2047		ILMN_2161007	GABPB2	59.3239	35.6379		ILMN_1653466	HES4	17.1694	9.85984		ILMN_2170949	SNX10	24.6404	17.9716		ILMN_2106449	PLEKHF2	8.16058	17.143
ILMN_1794132	NDUFS8	16.0511	21.7199		ILMN_1707372	RNF187	20.3526	7.4578							ILMN_1653797	C6ORF62	17.9103	28.3551		ILMN_1807662	IGF2R	34.1001	30.7202		ILMN_2175094	TDRD1	63.2126	31.6434		ILMN_1767894	POLB	8.48809	18.4482		ILMN_2407235	LOC402057	11.5737	30.9734		ILMN_1702585	LOC646817	7.20883	18.0565
ILMN_1689446	EIF3G	20.6354	17.1258		ILMN_1743232	MICALCL	20.7738	6.91936							ILMN_1725862	USP3	11.6597	34.5847		ILMN_1815054	GPR97	26.5003	38.0177		ILMN_2262275	TRIM13	58.6286	34.7271		ILMN_1736863	TMEM140	11.8863	15.0008		ILMN_1690894	TRA1P2	11.6803	30.66		ILMN_1656134	CNOT7	13.534	11.5546
ILMN_1719986	PIK3IP1	27.6884	9.97423		ILMN_1748591	ODC1	12.3569	15.039							ILMN_1700518	HMGN4	10.9392	35.2551		ILMN_2364022	SLC16A3	37.3062	27.1872		ILMN_2279367	FCAR	58.9251	33.6954		ILMN_1704972	TRIM5	9.23114	17.3511		ILMN_1696911	FTHL8	17.5992	24.7146		ILMN_1769245	GLIPR1	10.3091	14.2301
ILMN_1802553	MRPS24	21.9452	15.5947		ILMN_1697166	C9orf78	18.8955	8.47365							ILMN_1722522	CCNT2	15.8704	30.2896		ILMN_2241953	PILRA	31.6578	32.5899		ILMN_2261519	AIRE	44.9233	45.7935		ILMN_1797895	FFAR2	12.199	14.2746		ILMN_1655827	COPS2	6.73196	35.5118		ILMN_1735014	KLF6	7.44646	16.0512
ILMN_1701613	RARRES3	18.3928	19.0816		ILMN_1844692	FOXO3	20.0746	7.00184							ILMN_1741176	CHMP2B	10.3147	35.7728		ILMN_2379718	RAB24	20.475	43.6501		ILMN_2157277	AKR1D1	61.1097	29.4871		ILMN_2337655	WARS	9.6811	16.7792		ILMN_2229170	CRSP9	14.9765	27.137		ILMN_1813240	EIF1AX	5.70607	17.6241
ILMN_1745075	RPLP0	30.6573	6.73855		ILMN_2092390	CXorf20	7.59801	19.2252							ILMN_1749297	ACTL6A	11.6734	34.3867		ILMN_1685312	PSG3	22.8957	41.1761		ILMN_2106380	TNFSF15	58.485	32.0691		ILMN_2317751	REC8	8.41789	18.0152		ILMN_2218780	PPM2C	8.69165	33.3475		ILMN_2342579	IL7R	6.98006	16.3176
ILMN_2070300	LSM2	22.0717	15.2564		ILMN_1815392	ACTRT1	16.2931	10.5159							ILMN_1814526	ADD3	7.10898	38.9255		ILMN_1709683	RASSF2	23.8714	40.1365		ILMN_1690237	PCDHB19P	37.32	53.1725		ILMN_1672606	OAS1	10.9361	15.3543		ILMN_2045419	BNIP3L	6.98774	34.9636		ILMN_1763265	CHMP1B	11.0847	12.1589
ILMN_1777344	RPS13	27.3739	9.93104		ILMN_1750181	TESC	18.2499	8.32609							ILMN_1658992	DPM1	11.4518	34.2976		ILMN_2348487	EMR3	18.8532	45.1188		ILMN_2363392	TNFSF14	46.6829	42.7799		ILMN_1678766	DYNLT1	6.59684	19.673		ILMN_2223130	SMARCA5	23.7991	18.1504		ILMN_2357770	TCEA1	6.7207	16.3418
ILMN_1656807	RPL27	29.1551	8.08115		ILMN_1733937	MMD	9.83449	16.5268							ILMN_1773576	CPNE3	12.7939	32.9363		ILMN_1794165	PGD	22.8854	40.9021		ILMN_1748968	ATG10	30.5506	58.6736		ILMN_1772964	CCL8	10.9383	15.0638		ILMN_1660812	C14orf11	17.1961	24.6448		ILMN_1706645	C6orf150	6.32355	16.6903
ILMN_1783695	EPRS	24.9182	12.2646		ILMN_1789627	2012-09-05	10.406	15.88							ILMN_1724139	TMEM123	9.32628	36.2796		ILMN_2402341	MAPK3	26.1204	37.404		ILMN_2288483	C3orf34	73.9105	14.7621		ILMN_1681301	AIM2	7.98382	18.0169		ILMN_2377862	RAB6A	10.6342	31.1499		ILMN_1653498	IGSF6	6.2506	16.6144
ILMN_1798189	COX7C	28.4186	8.68801		ILMN_1675617	NT5M	12.3837	13.8229							ILMN_1782954	HIP2	10.8122	34.6584		ILMN_2395711	ARRB2	23.9606	39.5633		ILMN_2209993	PLIN5	29.3978	59.0746		ILMN_1691717	RHBDF2	15.7945	9.4133		ILMN_2320906	RTN3	18.8692	22.8578		ILMN_1702592	WDR73	6.33545	16.5211
ILMN_2179837	BANF1	25.4417	11.5397		ILMN_2337789	2012-03-02	19.9064	6.08218							ILMN_1736585	TMED10	8.3568	37.1046		ILMN_1713301	DGCR2	23.353	39.9964		ILMN_2361104	ZMAT3	61.1246	26.6364		ILMN_1674891	KIAA1618	5.89639	19.2663		ILMN_2386891	GLT8D1	8.40801	33.2531		ILMN_2075334	HIST1H4C	5.96626	16.6605
ILMN_1785202	STAT4	21.4032	15.5217		ILMN_1708580	PDZK1IP1	17.6802	8.11175							ILMN_1725121	XPO1	11.0452	34.4034		ILMN_1667883	THOC5	23.9975	39.2223		ILMN_2203807	MRP63	23.5759	64.1124		ILMN_1777565	TAP2	7.97617	16.9648		ILMN_2119421	LOC143543	15.3869	26.208		ILMN_1815733	EIF5	10.1265	12.4319
ILMN_1683597	LOC652071	22.7525	14.0813		ILMN_1724183	CDKL1	10.8586	14.819							ILMN_2351309	TIAL1	14.8279	30.5857		ILMN_2397521	KDM6B	31.3331	31.8237		ILMN_2070043	PPM1K	39.349	47.0904		ILMN_2289093	KIAA1618	12.8361	11.5048		ILMN_1795243	LOC220433	21.5917	19.9791		ILMN_1666761	PPP2R5E	6.32546	16.2106
ILMN_1685378	LOC728973	28.5277	8.11616		ILMN_1691476	MYLK	10.3635	15.1889							ILMN_1790650	C16ORF63	15.0473	30.3048		ILMN_1653292	PFKFB4	29.5033	33.2652		ILMN_1746314	EVI5	32.5907	53.6709		ILMN_2352121	NT5C3	8.11576	16.168		ILMN_2182120	SF3B14	15.2128	26.2063		ILMN_1662973	CD82	6.09318	16.3227
ILMN_1737398	PTPLAD1	19.5052	17.137		ILMN_1747650	BMP6	12.9881	12.3172							ILMN_1699208	NAP1L1	6.19117	39.1484		ILMN_1706342	ZNF746	29.7204	32.9109		ILMN_1691428	PSMD12	66.4481	19.753		ILMN_1812759	GCH1	8.42609	15.7409		ILMN_2134538	FTHL11	22.8267	18.5267		ILMN_1731907	LOC643313	8.2572	14.1554
ILMN_1673738	LOC646483	26.7111	9.88159		ILMN_2393712	CTTN	12.0667	13.0358							ILMN_2323526	WAC	16.509	28.8152		ILMN_2399503	UBN1	28.1447	34.4331		ILMN_1746919	LOC643882	24.2623	61.5389		ILMN_2374865	ATF3	8.48818	15.5421		ILMN_1791568	CEP57	14.318	26.9065		ILMN_1667707	SPCS3	8.35349	14.0006
ILMN_1678966	SNRPF	26.9336	9.65015		ILMN_1703102	LOC731777	18.1586	6.79936							ILMN_2392717	LARP7	9.74732	35.4903		ILMN_1736180	FRAT1	21.4881	41.0538		ILMN_2154322	SEMA3E	59.5256	25.8472		ILMN_1654389	LOC728744	8.31977	15.5083		ILMN_2094587	USP8	15.8699	25.2718		ILMN_1657451	SRPK2	6.69215	15.6168
ILMN_2315979	LBH	20.524	15.9595		ILMN_1690783	TREML1	9.71384	14.2803							ILMN_2293758	AKAP11	14.0373	31.0196		ILMN_2232177	ACTN1	24.6635	37.8269		ILMN_2235785	KCNH6	79.413	5.79103		ILMN_1658995	ACOT9	10.8313	12.8576		ILMN_1664691	DAPP1	10.8346	30.2529		ILMN_1727050	PPFIA1	5.57532	16.718
ILMN_1679587	LOC651202	26.7267	9.74758		ILMN_1671486	HOMER2	5.93649	18.0503							ILMN_1741613	SERINC1	9.42711	35.6065		ILMN_1778977	TYROBP	15.5739	46.892		ILMN_2096970	MYO3B	49.7413	32.9784		ILMN_2406313	RBCK1	13.5983	9.97274		ILMN_1791466	HMGB1	14.1457	26.9047		ILMN_2379967	FCAR	9.47469	12.7919
ILMN_2367020	SEC61G	17.2215	19.2432		ILMN_1792455	TMEM158	11.0901	12.6344							ILMN_2363591	SDCBP	7.93073	37.0398		ILMN_1781155	LYN	17.0636	45.3922		ILMN_1809750	TDRD1	45.8285	34.9839		ILMN_1750321	LBA1	9.96053	13.5666		ILMN_1706013	FTHL11	19.0119	22.0272		ILMN_2120965	NPAT	7.87612	14.364
ILMN_1713394	LOC441876	25.6738	10.7159		ILMN_1774086	CBX3	16.0121	7.54417							ILMN_2369682	HNRPA2B1	8.76481	36.1581		ILMN_1711617	GMFG	24.9326	37.2272		ILMN_1651499	ERGIC1	29.1945	50.5611		ILMN_2371724	CEACAM1	8.59848	14.8905		ILMN_2055700	SLBP	12.2705	28.6038		ILMN_1661366	PGAM1	5.98675	16.2515
ILMN_2091412	FLT3LG	30.005	6.28823		ILMN_1729453	TSPAN9	8.74921	14.7905							ILMN_2405018	PPP1CB	11.9649	32.9485		ILMN_1656482	OSBPL2	29.2586	32.8552		ILMN_2110751	CHRNA5	55.2096	24.4937		ILMN_2094166	CHMP5	14.8839	8.42878		ILMN_2230579	RABGEF1	11.1649	29.4735		ILMN_2204754	TMX4	5.80934	16.3866
ILMN_2205211	LOC134997	24.8926	11.3713		ILMN_1784602	CDKN1A	11.3381	12.1652							ILMN_1666384	LOC151579	12.137	32.7492		ILMN_1767365	PAK1	27.6798	34.2767		ILMN_1738678	C9orf130	37.834	40.7819		ILMN_1760858	RAB8A	7.45127	15.7264		ILMN_1760089	LOC645018	9.612	30.6934		ILMN_2169152	SRGN	6.20525	15.8999
ILMN_1775522	MAGED1	28.3851	7.85702		ILMN_2392189	CTDSPL	9.85983	13.5116							ILMN_2099594	SRP9	11.8836	32.8651		ILMN_1782050	CEBPD	33.881	27.9597		ILMN_1679083	ZNF93	29.8919	48.5858		ILMN_1716815	CEACAM1	8.36886	14.7897		ILMN_1674128	CWC22	8.99129	31.2685		ILMN_2394250	PLEKHA1	7.88758	14.1529
ILMN_1753745	HDDC2	20.3607	15.8802		ILMN_1693471	KLHL35	6.57323	16.5938							ILMN_2377174	SYPL1	8.28045	36.4041		ILMN_1775257	PROK2	25.8112	35.9914		ILMN_2394132	PRO1853	31.4607	45.9005		ILMN_1720771	STX11	8.69236	14.2023		ILMN_1652073	LOC653658	21.5758	18.6099		ILMN_1767514	LOC441155	8.75939	12.9656
ILMN_1815292	RPL7	28.5328	7.69058		ILMN_1692191	GNA12	16.377	6.77844							ILMN_2334303	SEC24B	6.95062	37.7306		ILMN_1815479	NOP10	20.0383	41.619		ILMN_2363027	RAD51	32.3337	44.9674		ILMN_1814726	SCARB2	9.91496	12.7775		ILMN_1732080	SUMO1P3	11.8344	28.2529		ILMN_1708414	GNL3L	10.8422	10.6498
ILMN_1705737	IMPDH2	26.2192	9.96265		ILMN_1726704	RSC1A1	13.3234	9.82869							ILMN_1778796	ADSS	9.56243	34.9553		ILMN_1694810	PANX2	26.7645	34.7852		ILMN_2091707	LOC123688	34.6514	41.8583		ILMN_2412214	LGALS9	10.0723	12.5608		ILMN_1776347	TCP1	18.3305	21.732		ILMN_2391333	CYP20A1	5.60171	15.8313
ILMN_1774584	C2orf28	18.4039	17.7053		ILMN_1804448	MSI2	13.6622	9.43356							ILMN_1735461	DDX21	12.3499	32.139		ILMN_1772302	MTHFS	20.4177	41.1015		ILMN_1700182	LOC400721	57.1744	18.0276		ILMN_1750400	C19orf66	16.9379	5.54012		ILMN_2087080	RPL5	13.0021	26.9088		ILMN_1708537	RBPJ	5.69904	15.4119
ILMN_1689665	NAE1	24.5328	11.5372		ILMN_2369580	C16orf35	16.343	6.63753							ILMN_1659255	RP2	10.717	33.7235		ILMN_2378100	FBXL5	26.3265	35.0608		ILMN_1722492	DUSP19	48.1799	25.6811		ILMN_1726591	CARD16	12.5384	9.68032		ILMN_1661174	LOC731640	16.2745	23.5661		ILMN_1754130	TRIM52	6.01767	14.9661
ILMN_1671217	LOC440733	21.2581	14.7492		ILMN_1703679	FCGR3A	14.0109	8.86998							ILMN_1670752	KIAA0907	15.8221	28.5334		ILMN_1692219	RAB11FIP1	24.7721	36.308		ILMN_1657701	TMEM137	33.1466	38.719		ILMN_2376108	PSMB9	8.80575	12.9153		ILMN_1675448	ZFP36L1	20.3313	19.4153		ILMN_1652378	IPO7	6.30116	14.6543
ILMN_2343010	BOLA3	24.86	11.0755		ILMN_1733538	RGS10	14.2655	8.55737							ILMN_1711516	ATP6V1A	8.34175	35.9792		ILMN_1672834	SSH2	30.1487	30.8799		ILMN_2054928	XPNPEP3	46.6939	24.9043		ILMN_1664330	CEACAM1	6.88672	14.4711		ILMN_1739622	PPP1R12A	9.44099	30.0685		ILMN_1800602	GCA	6.92187	14.0125
ILMN_1764323	LOC124512	22.5505	13.3476		ILMN_1668374	ITGB5	10.3372	12.4536							ILMN_1767747	HDAC2	17.2805	27.032		ILMN_1759818	SORL1	25.9083	35.0225		ILMN_1787314	ALS2CR14	23.2833	47.3206		ILMN_1693009	FGL2	8.73836	12.3128		ILMN_2379835	SUMO1	16.0351	23.3753		ILMN_1788988	THAP1	6.24177	14.5266
ILMN_2128128	SHFM1	17.6476	18.1759		ILMN_2355831	FHL2	15.4588	7.11113							ILMN_1813491	SPTLC1	10.83	33.4067		ILMN_1750158	ACOX1	20.2764	40.5174		ILMN_2059844	ANKRD44	32.7999	37.2221		ILMN_2373177	PANK2	6.16656	14.7274		ILMN_1750278	FTHL12	16.8923	22.3278		ILMN_1655414	TNFSF14	12.4758	8.21577
ILMN_1762747	RPL15	26.6392	9.04775		ILMN_1791248	C20orf175	13.2298	9.33216							ILMN_2325574	CASC4	6.66209	37.2213		ILMN_1803564	YIPF1	11.923	48.6768		ILMN_1791375	STAG3L2	41.6425	28.0646		ILMN_1813455	SP110	6.10022	14.6657		ILMN_1692956	LOC643949	18.6497	20.5352		ILMN_1716988	OPN3	5.66308	15.0279
ILMN_1701832	RPL19	24.8015	10.7145		ILMN_1772780	TCP11L2	12.6288	9.76853							ILMN_1703791	ANXA7	14.061	29.7811		ILMN_1777998	ARHGAP25	21.2683	39.2177		ILMN_2352245	RASSF6	36.2487	33.2559		ILMN_1767006	PSMB8	9.95481	10.5354		ILMN_1716014	LOC653232	21.8106	17.2395		ILMN_2085760	ARPC1B	5.92933	14.4221
ILMN_1745172	ILF2	20.3465	15.1384		ILMN_1658420	DSCAM	14.6821	7.62597							ILMN_1700276	C14ORF100	7.13659	36.6327		ILMN_1701603	ALPL	24.9107	35.5525		ILMN_1771320	FLJ38717	33.5162	35.1581		ILMN_1654812	UNC93B1	9.25287	11.2232		ILMN_1664706	LOC653604	9.24215	29.7619		ILMN_2388955	C1orf183	5.67572	14.6317
ILMN_1751072	SRPRB	18.2192	17.2588		ILMN_2282959	DNA2	11.1637	10.7378							ILMN_1732534	CHMP5	16.0222	27.6912		ILMN_1660691	RAB31	18.9936	41.4498		ILMN_1784554	LOC647389	40.986	27.2991		ILMN_1753342	SAT1	10.6945	9.63911		ILMN_1736068	CNOT8	15.0026	23.9412		ILMN_1772036	STEAP4	5.71844	14.5529
ILMN_1812769	UBXN1	12.2082	23.2579		ILMN_1721888	ITGA2B	9.93258	11.6918							ILMN_1698487	SDHD	10.56	33.034		ILMN_2078697	ALPK1	21.031	39.2015		ILMN_2396272	PDCD4	28.7297	39.4526		ILMN_1769734	NT5C3	8.02167	12.2835		ILMN_2043109	TOP1P2	14.8448	23.901		ILMN_1799028	TSPAN5	5.6136	14.6457
ILMN_1748827	LOC388564	20.164	15.1946		ILMN_1706483	C1orf116	6.31314	15.2735							ILMN_1724753	NIN	7.31866	36.2595		ILMN_1705047	TLR8	21.3975	38.8157		ILMN_1659490	LOC653158	30.5855	36.8946		ILMN_1807448	FAM8A1	11.1527	9.08944		ILMN_2392080	DCAF6	7.8766	30.8271		ILMN_1672004	TOB1	5.70155	14.5304
ILMN_1714599	CAMLG	12.0426	23.2529		ILMN_1748883	CDKN2D	13.0702	8.39815							ILMN_1656682	AZIN1	7.8899	35.5665		ILMN_1712999	LOC642103	32.0812	27.953		ILMN_1697793	SYNJ2BP	41.4488	25.9317		ILMN_1678833	CCR1	7.65585	12.4473		ILMN_1766115	PLEKHF2	6.94055	31.7417		ILMN_1777726	USP48	6.00856	14.2158
ILMN_1680208	LOC284821	26.8656	8.34146		ILMN_1762764	SH3BGRL2	7.05767	14.248							ILMN_2373177	PANK2	14.1743	29.2783		ILMN_2087646	HLX	31.1625	28.8615		ILMN_1742163	LOC441087	41.3134	25.6215		ILMN_1748473	GIMAP4	9.03625	11.0385		ILMN_1656463	C11orf73	8.91999	29.7386		ILMN_1716446	BCL10	7.08978	12.916
ILMN_2097421	MRPL51	20.4614	14.7061		ILMN_1679617	LOC654155	9.86547	11.3468							ILMN_1659786	CCDC76	10.6184	32.8248		ILMN_2406501	SOD2	22.7806	37.2324		ILMN_2101651	MBTD1	35.2073	31.6803		ILMN_1715760	LGALS9	5.98509	13.8499		ILMN_2230016	HIGD1A	16.6264	21.8774		ILMN_1697309	NCF1	7.157	12.6633
ILMN_1707088	DENND2D	23.8537	11.2967		ILMN_1744912	CTTN	9.17702	11.9125							ILMN_2251978	C21ORF66	9.1571	34.229		ILMN_1803560	LAT2	31.2869	28.6408		ILMN_2062381	LCOR	29.4635	37.0238		ILMN_1687768	NCOA7	5.55504	13.6395		ILMN_2401933	ATP2B1	10.3451	28.1334		ILMN_1732074	LOC648210	7.44944	12.3137
ILMN_1705892	SH2D1A	18.1242	16.8845		ILMN_1664118	LOC643665	7.39095	13.5899							ILMN_1658182	MEX3C	5.61578	37.6338		ILMN_1805693	GMIP	20.2116	39.6184		ILMN_2180239	DOPEY2	32.2441	33.8837		ILMN_1677827	TLR7	6.85852	12.185		ILMN_2183331	RBM7	12.5972	25.8367		ILMN_1751708	ITM2B	6.24413	13.3625
ILMN_1786823	ICAM2	19.0523	15.9022		ILMN_1743290	GP9	9.93158	10.7871							ILMN_1679727	CLK1	16.7852	26.4344		ILMN_1657892	TLR8	26.254	33.4758		ILMN_1656233	LOC389517	39.2205	26.7975		ILMN_1667825	MLKL	10.4517	8.51326		ILMN_1680192	APOBEC3A	10.6054	27.7963		ILMN_1659854	PRPF40A	7.01562	12.5872
ILMN_1771593	RRM1	20.6647	14.2707		ILMN_2263054	FEZ1	11.2457	9.44476							ILMN_2042595	PCM1	12.8101	30.3788		ILMN_1673352	IFITM2	17.0175	42.5811		ILMN_1690880	CTAGE5	35.3397	29.8344		ILMN_1720048	CCL2	11.4818	7.12479		ILMN_1679280	LOC643997	15.2909	23.0957		ILMN_1683127	ZNF281	9.03797	10.436
ILMN_1651899	LOC653314	24.7902	10.0816		ILMN_1805833	LOC646508	12.0301	8.6308							ILMN_1693259	PDCD6IP	7.72854	35.4573		ILMN_1689046	FLJ20273	17.181	42.3765		ILMN_1745841	KIAA0492	18.5911	46.2495		ILMN_2109197	EPB41L3	8.00921	10.1622		ILMN_1709948	LOC651453	10.7379	27.6357		ILMN_2362858	PILRA	5.57055	13.877
ILMN_1704286	FXYD5	21.41	13.4498		ILMN_1805216	GPC6	13.4977	7.09754							ILMN_1680781	C14ORF135	8.20791	34.9251		ILMN_1746836	PTAFR	25.7019	33.8409		ILMN_2101650	MBTD1	21.8438	41.0577		ILMN_1676448	WDFY1	6.24742	11.9109		ILMN_1761833	SLC40A1	22.7646	15.5663		ILMN_1737627	MAPK14	6.06343	13.1625
ILMN_1679025	LOC641848	18.4631	16.2654		ILMN_2311166	ITGB5	9.49667	11.0561							ILMN_1783023	LOC285636	12.5791	30.5361		ILMN_1706304	EIF2C4	13.0217	46.5062		ILMN_2148290	PDCD7	52.4903	9.77659		ILMN_1663347	OTOF	7.95089	9.99249		ILMN_2103720	MRPL15	15.0199	23.3086		ILMN_1675387	LIMS1	9.13955	10.0255
ILMN_2338323	CDC25B	19.3303	15.2304		ILMN_1728331	ACPT	8.30944	12.2096							ILMN_1739083	SIRT1	10.5141	32.5935		ILMN_1807596	UBAP1	10.8829	48.5974		ILMN_1789830	CFLAR	22.9637	39.127		ILMN_1801464	ANKFY1	9.791	8.12153		ILMN_2173835	FTHL3	19.7542	18.536		ILMN_1800638	CUGBP2	9.27168	9.83557
ILMN_1722491	APRT	18.4484	16.025		ILMN_1684771	PGRMC1	7.14081	13.3729							ILMN_1796738	SPAST	10.0298	33.0497		ILMN_1708348	ADAM8	23.618	35.7253		ILMN_1652533	DKFZp434K191	24.4543	37.4353		ILMN_1759250	TAP2	7.14412	10.5951		ILMN_2186482	TMED7	16.5396	21.6986		ILMN_2270100	C6orf204	5.65588	13.3855
ILMN_1667813	LOC648000	23.1912	11.2298		ILMN_1705686	NRGN	12.6775	7.7327							ILMN_2382354	SENP7	11.4542	31.6148		ILMN_2397199	NDEL1	13.9892	45.3428		ILMN_1656656	COX19	37.9651	23.745		ILMN_1801822	C18orf25	5.84634	11.6018		ILMN_2145250	NACAP1	18.6603	19.5718		ILMN_1741727	QPCT	7.55563	11.4528
ILMN_2298818	RPS29	9.01028	25.3339		ILMN_1668559	RGS10	11.6561	8.74026							ILMN_1746856	RAB21	15.7751	27.1458		ILMN_1726597	FAM65B	12.3841	46.8955		ILMN_1672356	ANKRD13D	30.384	30.1955		ILMN_2119297	SAMD4A	7.68832	9.46237		ILMN_2294751	ASCC3	8.39888	29.4243		ILMN_1688621	C9orf80	9.7989	9.11708
ILMN_1739847	EIF3D	24.2704	10.0371		ILMN_1760688	SAMD14	8.61749	11.708							ILMN_1791702	SMARCA2	7.36764	35.4515		ILMN_2205963	C10orf54	22.9866	36.1887		ILMN_1775444	FLJ12078	28.6736	31.0041		ILMN_1703949	KPNB1	9.32599	7.72265		ILMN_1690295	LOC648343	11.3543	26.4624		ILMN_1712577	FAM174A	5.8361	12.7566
ILMN_1753582	RPA2	16.4913	17.7828		ILMN_1775373	CMTM5	8.7886	11.5213							ILMN_2384241	TGFBR2	8.39767	34.4006		ILMN_1763745	FLJ14166	26.2298	32.8597		ILMN_2334242	CREB1	34.8831	24.3566		ILMN_2373062	RHBDF2	9.37196	7.63854		ILMN_1761474	LOC654189	8.3726	29.3595		ILMN_1735367	HSD17B11	7.81181	10.6531
ILMN_2073012	TMEM203	15.4555	18.7133		ILMN_2372403	ALDH5A1	14.1989	6.10033							ILMN_1703949	KPNB1	7.20475	35.5447		ILMN_2345353	LST1	20.9253	37.984		ILMN_2133784	PATE2	19.0213	39.9215		ILMN_1796409	C1QB	6.20694	10.7291		ILMN_1734814	HSPA4	14.766	22.855		ILMN_1779190	ALKBH8	6.11183	12.2667
ILMN_1703433	PLSCR3	27.5786	6.54857		ILMN_1657478	MAGEL2	11.4732	8.78081							ILMN_1807304	MBNL1	11.8964	30.8062		ILMN_1729294	RNF130	20.1925	38.6131		ILMN_1734991	PPM1B	22.254	36.5428		ILMN_1716678	NPC2	6.06889	10.7009		ILMN_2222688	TMSB4X	7.5923	30.0133		ILMN_2398939	MBP	8.75061	9.56976
ILMN_2207539	RPS17	20.5072	13.4749		ILMN_1710280	TUBB1	9.86593	10.3822							ILMN_1763404	LOC653226	10.1393	32.533		ILMN_1750401	C17orf62	18.9879	39.6177		ILMN_1731203	RNF213	21.8373	36.7142		ILMN_2066849	FAM26F	6.80575	9.56419		ILMN_1686811	LOC402644	17.5073	20.0949		ILMN_2324157	UBA3	5.73896	12.5536
ILMN_1655765	MRPS21	23.218	10.762		ILMN_1796734	SPARC	5.97025	14.2529							ILMN_1715273	PICALM	12.5662	29.932		ILMN_1665004	CASC3	15.5801	42.9808		ILMN_2389376	WDR23	24.5434	33.2104		ILMN_1669113	ATF5	5.63713	9.77785		ILMN_2233493	GPBP1	20.1831	17.3473		ILMN_1714418	FAM101B	11.0305	7.23181
ILMN_1793651	UBE2N	18.8402	15.1276		ILMN_1788095	SPRYD3	10.2921	9.60054							ILMN_1796305	UPF2	5.77064	36.6818		ILMN_2320906	RTN3	21.5266	36.9878		ILMN_2362681	CES2	32.4986	25.1535		ILMN_1727150	DHRS9	9.55579	5.74955		ILMN_1791186	ARHGAP18	9.04206	28.4485		ILMN_2105308	DPM1	9.70811	8.53885
ILMN_1763460	NHP2L1	25.0552	8.83125		ILMN_1676973	CABP5	9.04464	10.6259							ILMN_2155998	PSMD6	9.22339	33.1907		ILMN_1806999	B9D2	27.0552	31.2487		ILMN_1690443	C14orf82	12.8813	44.7041		ILMN_2335813	GCH1	7.92394	7.0949		ILMN_1704760	BZW1	12.4413	24.9134		ILMN_2363586	SDCBP	10.4118	7.0944
ILMN_1666399	RING1	22.53	11.2744		ILMN_1671928	PROS1	13.3552	6.09555							ILMN_1718071	AGTPBP1	13.128	29.2447		ILMN_1676984	DDIT3	17.5143	40.6542		ILMN_1742431	LOC651309	35.7774	20.7311		ILMN_1766514	LOC650274	5.81153	8.91102		ILMN_1813975	ADI1	13.9601	23.3043		ILMN_1813028	CBX5	6.07583	11.4198
ILMN_1733421	PRKCQ	27.9283	5.85614		ILMN_1668092	ESAM	7.23318	12.196							ILMN_1690487	PCM1	12.4676	29.8465		ILMN_2326953	LAT2	32.7346	25.3911		ILMN_1696027	LOC642333	23.1213	32.6057		ILMN_1722158	CASP5	6.22674	8.46986		ILMN_1766718	LYSMD3	18.7183	18.348		ILMN_1661537	LEPROT	8.56429	8.9189
ILMN_2110281	UFC1	20.1114	13.6689		ILMN_1767310	CXorf20	6.21425	12.9016							ILMN_1725312	RASA1	11.6044	30.6612		ILMN_1774874	IL1RN	20.3943	37.5083		ILMN_2070052	LOC613037	28.1635	27.4248		ILMN_1751330	RBCK1	8.71477	5.8819		ILMN_1675117	HSD17B11	19.9455	17.1103		ILMN_1703049	AKAP7	7.88477	9.51603
ILMN_1753534	RPS18	23.1316	10.6396		ILMN_2108823	FZD7	6.40088	12.4949							ILMN_1752837	ARL8B	12.1647	30.0992		ILMN_2410986	STAT3	17.9811	39.8695		ILMN_1689552	FAM63A	32.7461	22.2815		ILMN_1806448	NTNG2	6.31489	8.20108		ILMN_1807243	PRPF18	11.2264	25.7143		ILMN_1737406	KLF6	8.02292	9.28713
ILMN_1737588	C21orf33	15.7022	17.9753		ILMN_1733324	ITGB3	8.39748	10.468							ILMN_1706075	SF3B1	15.3523	26.8552		ILMN_1810514	SLC25A44	21.8255	35.9133		ILMN_1734602	SRRM2	25.3228	28.3244		ILMN_1813625	TRIM25	5.80857	8.57645		ILMN_1809439	HMGB1L1	17.2111	19.7096		ILMN_1681760	LOC728518	8.13284	9.17444
ILMN_1810577	RPS4X	22.959	10.4926		ILMN_2100458	RFESD	10.487	8.33878							ILMN_1678922	HERC4	11.4134	30.685		ILMN_1678454	CASP4	28.9353	28.6673		ILMN_2278653	ZNF493	29.4414	23.8641		ILMN_1691436	BLVRA	6.7217	7.37539		ILMN_1746664	WSB2	10.2721	26.6063		ILMN_2336280	QKI	7.24881	10.0457
ILMN_1711573	CD96	25.7279	7.63529		ILMN_2370091	NGFRAP1	6.96999	11.8348							ILMN_1724700	RIOK3	7.38836	34.6267		ILMN_1810725	FAM129A	14.8349	42.7019		ILMN_1656393	PPP2R3A	17.4922	35.4463		ILMN_2319077	FAS	6.58216	7.32333		ILMN_1746525	FTHL2	19.399	17.4586		ILMN_2331544	MBP	8.46334	8.806
ILMN_1775542	FAIM3	24.5194	8.7742		ILMN_1730487	CALD1	6.24348	12.4646							ILMN_1737651	CDC40	13.0249	28.9733		ILMN_1749078	TIMP2	24.298	33.179		ILMN_1655961	C7orf54	33.8278	18.5366		ILMN_1764709	MAFB	6.37592	7.43219		ILMN_2211800	HMGB1L1	21.0523	15.7977		ILMN_2235283	MAPK1	6.20222	11.0206
ILMN_1692956	LOC643949	23.1751	10.1065		ILMN_1782419	GNG11	7.29922	11.3597							ILMN_2174369	ELOVL5	8.2374	33.6855		ILMN_1702787	SEMA4A	22.4145	34.9319		ILMN_2347424	MBOAT2	26.2574	25.7518		ILMN_2281502	DHRS9	6.26578	7.36099		ILMN_2136133	PABPC1	22.3417	14.4579		ILMN_2371685	UBE2E1	7.69148	9.50375
ILMN_2415786	CD96	20.5382	12.7299		ILMN_1771061	BRD4	11.4827	7.06533							ILMN_1761721	VPS35	9.24139	32.6254		ILMN_1738992	MNDA	26.8768	30.4575		ILMN_2184789	HSCB	21.949	29.5371		ILMN_1733249	GNB4	5.63286	7.93131		ILMN_2347917	EED	9.08573	27.6874		ILMN_1708627	LOC653226	9.6377	7.39564
ILMN_1760303	PIK3R1	19.7445	13.4104		ILMN_1802162	RFESD	7.83402	10.6695							ILMN_1687519	SNAP23	13.8693	27.9796		ILMN_1724544	PPP4R1	26.0122	31.2805		ILMN_1780496	MGC12760	23.8981	27.5719		ILMN_1718977	GADD45B	7.26974	5.98664		ILMN_1662158	LOC653147	6.54453	29.9178		ILMN_1791896	EBAG9	5.98001	11.0459
ILMN_1791332	ATP5O	19.4271	13.6636		ILMN_2339835	PTGS1	9.32042	8.98151							ILMN_2054233	SENP6	12.3842	29.4135		ILMN_1663489	UBR2	14.4801	42.72		ILMN_1678457	ZNF600	10.6428	40.7936		ILMN_1671791	PCK2	6.18933	7.01638		ILMN_2151739	CAT	15.7185	20.6834		ILMN_1764087	SYPL1	5.577	11.4131
ILMN_1729533	APOA1BP	16.9944	16.0278		ILMN_1717163	F13A1	9.74014	8.53077							ILMN_1735367	HSD17B11	7.13754	34.5333		ILMN_2094952	NUAK2	29.7914	27.2526		ILMN_2225974	GCLM	38.0214	12.9559		ILMN_1799367	TXNDC14	6.69716	6.44482		ILMN_1658015	MBNL2	8.79616	27.5077		ILMN_2241953	PILRA	10.5053	6.38527
ILMN_1759952	PSMA5	20.1619	12.8172		ILMN_1787877	CCNT2	12.287	5.90097							ILMN_1837935	TNPO1	7.31725	34.2914		ILMN_1752351	LAMP2	21.0062	35.879		ILMN_1661519	KIAA0408	25.6218	24.1709		ILMN_1810289	FER1L3	6.01885	6.95489		ILMN_1655868	ANP32C	7.3553	28.9061		ILMN_1742332	KCTD12	5.9784	10.8921
ILMN_1786242	LOC649821	22.8367	10.1343		ILMN_1788457	ABCC4	8.46801	9.4167							ILMN_1743137	BAT2D1	12.1201	29.484		ILMN_1716983	LILRA2	25.5458	31.3224		ILMN_2219437	PRRG4	26.1813	22.3658		ILMN_1744517	GNS	5.54047	6.98488		ILMN_1689400	CLK1	6.01982	30.1298		ILMN_1656042	KIAA0319L	6.1223	10.7065
ILMN_1668228	LOC136143	19.9505	13.0067		ILMN_2090004	AQP10	6.90757	10.8549							ILMN_1733875	RUNDC1	8.67714	32.8356		ILMN_1780132	PELI2	22.4701	34.3971		ILMN_1656868	LOC23117	26.0537	22.4091		ILMN_1806165	HSPA6	6.18384	6.32852		ILMN_1730118	ZNF644	15.6479	20.4885		ILMN_1736747	MARK2	6.45373	10.2564
ILMN_1696839	RPS27	22.2425	10.7131		ILMN_1776640	MPL	9.17884	8.35863							ILMN_1783702	MORC3	12.5857	28.8048		ILMN_1718982	BEST1	20.8698	35.9731		ILMN_2379080	NFATC2IP	32.8463	14.9507		ILMN_1707077	SORT1	5.63762	6.83535		ILMN_1664802	WSB1	13.6373	22.4011		ILMN_1731113	ZBTB43	7.28317	9.19295
ILMN_1795243	LOC220433	22.1187	10.7915		ILMN_1677814	ABCC3	6.89048	10.6004							ILMN_1738346	EFHA1	14.8982	26.444		ILMN_1757074	GNG10	21.2894	35.4017		ILMN_1669433	KIAA0913	17.4953	29.5965							ILMN_1801923	ATF1	13.0859	22.8688		ILMN_2195821	C5orf41	9.68774	6.70222
ILMN_2413278	RPL13	24.6002	8.30822		ILMN_1657148	C19orf23	8.66259	8.70256							ILMN_1766713	HSPD1	7.05764	34.2026		ILMN_1689518	PECAM1	20.6245	35.9091		ILMN_2312228	FUT6	25.2504	21.6836							ILMN_2054145	PAK1IP1	6.66454	29.2513		ILMN_1736327	CDC42EP3	8.2994	7.93058
ILMN_2347349	CCNB1IP1	10.2906	22.5307		ILMN_2413527	VCL	7.03338	10.3076							ILMN_1792518	STX7	7.06076	34.1101		ILMN_1795826	ATP6V0D1	12.5378	43.9547		ILMN_2414436	RBM3	13.7401	33.1845							ILMN_2334121	PRKDC	9.41358	26.4982		ILMN_2333594	SUMO2	5.77078	10.3807
ILMN_1761131	PECI	23.1948	9.55991		ILMN_1752755	VWF	5.864	11.4752							ILMN_1683598	ACSL4	11.8854	29.2568		ILMN_1662799	GPSM3	29.6938	26.796		ILMN_1682165	NT5C2	9.37337	37.1916							ILMN_1680727	GLRX2	11.6861	24.1098		ILMN_1773154	NFKBIA	7.81359	8.30325
ILMN_1720542	POLR2I	23.1332	9.45997		ILMN_1783158	LY6G6F	5.82732	11.4562							ILMN_1750029	GABPA	8.92713	32.1986		ILMN_1752923	IFNAR1	24.5804	31.5267		ILMN_1763739	SOLH	23.8258	22.7192							ILMN_2261076	NEDD9	16.5814	19.2089		ILMN_1744471	ZNF654	6.51493	9.51589
ILMN_1680403	SSR4	17.1736	15.2872		ILMN_1743241	ARL4A	10.6814	6.51383							ILMN_1657993	ADNP	10.6049	30.4459		ILMN_1781580	BRI3	22.4399	33.6409		ILMN_1685365	ZNF773	7.15444	39.1707							ILMN_2113074	UFM1	7.52992	28.2279		ILMN_2044027	C20orf191	8.53614	7.47094
ILMN_2141444	RPL18A	17.4965	14.952		ILMN_1804339	CAMK1G	10.3682	6.81701							ILMN_1671207	IARS2	7.24278	33.749		ILMN_1726222	FLOT2	29.1753	26.8164		ILMN_1768117	RBM25	21.7091	24.3798							ILMN_1665738	FLI1	21.9923	13.7218		ILMN_1745415	BBX	6.27244	9.6781
ILMN_1665280	SPCS1	21.3915	11.0523		ILMN_1748450	TAL1	6.02779	11.0797							ILMN_1805344	DDX5	13.6856	27.2609		ILMN_1794190	CCPG1	20.3837	35.5741		ILMN_2322375	MAFF	25.1129	20.3345							ILMN_2224103	PAPSS1	10.1355	25.4836		ILMN_1767006	PSMB8	5.74441	10.1029
ILMN_1677262	LOC388621	11.6906	20.6185		ILMN_1738589	MGLL	7.79444	9.27579							ILMN_1785795	METAP1	10.311	30.5777		ILMN_1676515	IMPDH1	28.9764	26.8621		ILMN_1671992	LOC650128	15.8597	29.3329							ILMN_2342841	AFTPH	10.2021	25.329		ILMN_1793118	TAX1BP1	7.84413	7.98585
ILMN_2073010	TMEM203	19.0324	13.1835		ILMN_1713731	ALOX12	7.36458	9.52622							ILMN_1703697	LANCL1	6.60312	34.2607		ILMN_1727402	HCLS1	15.9026	39.8901		ILMN_1660629	NBEAL2	13.7846	30.4128							ILMN_1660477	LOC652608	5.64384	29.7684		ILMN_1652680	LOC652616	7.02467	8.77951
ILMN_1666635	RPS14	19.911	12.0583		ILMN_2084825	HBG2	8.25896	8.59223							ILMN_1747146	TSG101	14.9108	25.8834		ILMN_1787808	CEP63	19.1118	36.5779		ILMN_1733615	MTF2	12.8089	31.2934							ILMN_1652003	GNG10	9.59772	25.64		ILMN_2404135	RIOK3	6.01309	9.57616
ILMN_2327860	MAL	16.4497	15.5118		ILMN_1773906	NCOA4	6.44066	10.3531							ILMN_1682727	JAZF1	11.0754	29.7058		ILMN_1671404	SVIL	23.5702	32.1131		ILMN_2190779	PHAX	14.6565	29.4051							ILMN_2122103	ETS1	17.5786	17.5376		ILMN_1756525	KLHL20	7.35113	8.21178
ILMN_2372082	SNRPN	25.6389	6.24653		ILMN_1652306	MEGF10	7.02993	9.65156							ILMN_1785268	CD58	6.24382	34.504		ILMN_1687315	RXRA	19.7994	35.853		ILMN_1784037	ZBTB40	14.0764	29.7201							ILMN_1739854	C15orf29	6.75921	28.3189		ILMN_2395974	PRDX3	6.8237	8.53448
ILMN_1682694	LOC203547	18.8907	12.9638		ILMN_1728197	CLDN5	7.2866	9.19515							ILMN_1747052	ITGA4	10.8486	29.8061		ILMN_1684585	ACSL1	32.3192	23.1287		ILMN_2214997	LRRFIP1	31.2003	12.5874							ILMN_1660270	C7orf28A	12.9267	22.1095		ILMN_1776678	GIMAP7	6.43905	8.74884
ILMN_1684258	LOC646195	22.6905	9.14371		ILMN_1662174	ORMDL3	8.22413	8.25259							ILMN_1790985	DJ341D10.1	7.5052	33.1122		ILMN_1742981	TUBA1A	14.86	40.5654		ILMN_1710078	TMEM181	22.0439	21.1607							ILMN_2052383	R3HDM1	6.9542	27.8702		ILMN_1782331	TDG	5.90257	9.22448
ILMN_2116366	RPL12	16.4964	15.2875		ILMN_1739573	TNRC6A	6.11079	10.2217							ILMN_1708416	ARL6IP1	15.0185	25.5809		ILMN_1704385	LOC347376	20.5187	34.9057		ILMN_1786347	TNPO1	12.2767	30.6071							ILMN_1676792	LOC645138	15.5568	19.2562		ILMN_1679195	C20orf24	6.5892	8.50209
ILMN_2121282	MRPS18B	19.1024	12.6524		ILMN_1796678	HBG1	7.25109	9.0639							ILMN_1814305	SAMD9	13.0825	27.4527		ILMN_1658928	GNB2	17.0586	38.3381		ILMN_1768392	LOC648059	12.6824	30.1885							ILMN_1652787	PIK3AP1	14.8571	19.9086		ILMN_1738992	MNDA	6.25991	8.82449
ILMN_2064898	CCDC56	16.1807	15.5555		ILMN_1658519	SLC13A3	7.14171	8.98342							ILMN_1665357	EPS15	6.98653	33.468		ILMN_1782070	NPL	16.5674	38.761		ILMN_1655922	SAPS2	15.7934	27.0498							ILMN_1744611	WDSOF1	7.81559	26.937		ILMN_1771620	SNRPB2	6.22487	8.76265
ILMN_2333107	AES	24.3277	7.30811		ILMN_1732575	SEC14L1	7.86989	8.21772							ILMN_1655316	PSMC6	9.78373	30.6255		ILMN_1714592	CDA	22.2989	33.0101		ILMN_1769508	PIGX	24.6226	18.126							ILMN_2343332	TAF9	12.1449	22.5937		ILMN_1741176	CHMP2B	5.70712	9.2476
ILMN_1698940	LOC653232	22.4752	9.1136		ILMN_1687074	CDC14B	5.82844	9.73248							ILMN_1794187	FBXL3	6.03787	34.3708		ILMN_1728724	IL17RA	13.6314	41.6135		ILMN_2205470	FAM153B	23.7872	18.9267							ILMN_1795474	LOC644131	12.6298	22.1057		ILMN_2090558	C2orf25	6.48869	8.40638
ILMN_1654445	LOC347292	25.7243	5.86055		ILMN_1658702	HIST1H2BJ	5.77664	9.62983							ILMN_1742789	LPXN	7.27069	33.1078		ILMN_1746408	MIDN	18.0346	37.1634		ILMN_2074773	KCNK6	23.9589	18.6217							ILMN_2169839	CNBP	17.0823	17.5332		ILMN_1710406	PSMC1	6.81269	8.0611
ILMN_1667510	C12orf65	22.3215	9.17084		ILMN_1769191	GNAS	6.29445	9.1112							ILMN_2196347	CDKN1B	6.32615	34.0295		ILMN_1688373	LST1	17.4129	37.7721		ILMN_1662741	EDG4	10.6762	31.5448							ILMN_2087989	ZFAND1	7.41181	27.1932		ILMN_1739210	NSL1	5.54796	9.20752
ILMN_1717197	CD3G	25.2495	6.21808		ILMN_1675062	MYL9	6.42438	8.92371							ILMN_1814573	FLJ11171	12.4927	27.8196		ILMN_1809173	LOC729021	28.5387	26.5675		ILMN_2188204	ATG12	6.77148	35.2777							ILMN_2126832	SEC24A	6.07501	28.5169		ILMN_1688381	BPTF	7.37045	7.34309
ILMN_1769118	2012-09-09	24.0649	7.32964		ILMN_1693949	LOC650116	5.63764	9.65799							ILMN_1656136	STAU1	14.9211	25.3741		ILMN_1724407	TACC3	20.8297	34.2533		ILMN_1661138	GON4L	12.5687	29.1506							ILMN_2104877	CMPK1	16.6035	17.9197		ILMN_1723884	ARF4	7.32009	7.35978
ILMN_2415189	ATP1A1	22.3162	9.05789		ILMN_1745522	PF4V1	9.02495	6.20443							ILMN_1682180	VCPIP1	8.86808	31.3928		ILMN_1670926	CHST15	28.6434	26.4319		ILMN_1710362	LOC644591	25.6792	15.9425							ILMN_1762134	ECHDC1	7.91249	26.529		ILMN_1745885	POLR2F	6.57935	8.08432
ILMN_1808837	LOC644029	24.9568	6.35673		ILMN_1795429	VCL	5.66694	9.35563							ILMN_1708427	KPNA3	12.2949	27.8944		ILMN_1758735	NLRP12	11.3757	43.6328		ILMN_1683127	ZNF281	14.4032	26.672							ILMN_1757186	GIMAP1	18.4959	15.8817		ILMN_1752247	AKAP13	5.87348	8.51892
ILMN_2386016	C2orf28	15.5178	15.7531		ILMN_1784203	ACRBP	6.14091	8.77207							ILMN_1742230	BAZ1A	10.8798	29.2667		ILMN_1689968	PLEKHO2	21.052	33.9143		ILMN_1824898	LOC728653	12.0797	28.5241							ILMN_1689046	FLJ20273	15.4753	18.8829		ILMN_1790909	NFE2L2	8.38204	6.00043
ILMN_1678140	TTC4	13.5736	17.679		ILMN_1695719	EIF2C2	7.18713	7.66618							ILMN_2383611	PTPRE	11.8939	28.1578		ILMN_1775708	SLC2A3	27.0072	27.941		ILMN_1777049	ZNF160	19.3974	21.0544							ILMN_1656292	LOC388532	12.6638	21.6878		ILMN_1703053	ZFP91	6.31427	8.05667
ILMN_1670948	TSR2	22.6961	8.4967		ILMN_1672830	LOC642082	7.57976	6.87413							ILMN_1794392	DDX3X	6.04527	34.0015		ILMN_1679268	PELI1	21.6496	33.2248		ILMN_1803743	LOC196752	10.6206	29.8083							ILMN_2110908	MYC	16.189	18.0765		ILMN_1736700	ALDOA	8.28236	6.01409
ILMN_2156982	IMP4	15.4557	15.6949		ILMN_1810836	PDE5A	7.93768	6.48619							ILMN_2169839	CNBP	6.19791	33.8273		ILMN_1693014	CEBPB	23.2888	31.5648		ILMN_1801464	ANKFY1	24.3922	15.9894							ILMN_1735453	FAM98A	11.0808	23.1789		ILMN_1765644	COMMD8	8.52239	5.65626
ILMN_1781010	ARHGEF3	17.7144	13.3428		ILMN_1745343	ZMAT2	6.62177	7.72278							ILMN_1669259	ANKRD49	14.2341	25.7459		ILMN_1675756	KCNJ15	21.3559	33.4323		ILMN_2069446	SAFB2	18.5276	21.8056							ILMN_2408415	RPL9	18.0779	16.1367		ILMN_1750961	TM6SF1	8.12032	6.03285
ILMN_2381397	HSPD1	25.004	6.03983		ILMN_1787526	MGC13057	7.41319	6.92228							ILMN_2380999	RECQL	17.596	22.2978		ILMN_2338452	SERPINA1	10.0535	44.6097		ILMN_2119692	CSAD	18.7934	21.5095							ILMN_1709142	PURA	7.86316	26.2067		ILMN_1721629	ZNF654	6.94243	7.12308
ILMN_2189933	RPL36AL	16.4187	14.535		ILMN_1799728	ADAM15	7.25737	6.92523							ILMN_1756942	SP3	7.84233	32.0439		ILMN_1806293	LIN7A	21.881	32.7489		ILMN_2415748	WSB1	21.2053	18.8397							ILMN_2362368	U2AF1	10.8749	23.1313		ILMN_1680246	MAT2B	5.59914	8.20837
ILMN_1661174	LOC731640	14.9649	15.9366		ILMN_1765872	SIPA1L3	8.1951	5.88564							ILMN_1690806	PTPLB	6.54957	33.3005		ILMN_1663618	STAT3	14.0584	40.4607		ILMN_1739805	NDE1	15.4368	24.5009							ILMN_1720088	SFRS12	8.09924	25.8421		ILMN_2335704	NCF4	5.75507	7.95777
ILMN_1723729	RSL1D1	25.1438	5.71425		ILMN_1663519	SLC24A3	7.77623	6.18932							ILMN_1721657	RSU1	8.21562	31.6169		ILMN_1752455	DOCK5	21.8366	32.6781		ILMN_1761963	C4orf29	33.7366	6.17973							ILMN_1677906	LOC643287	20.6195	13.2678		ILMN_1654543	MED6	6.77496	6.91667
ILMN_1664931	GTF2E2	19.3078	11.5022		ILMN_1657708	MGLL	6.90862	6.75471							ILMN_1777066	NIF3L1	10.222	29.5527		ILMN_2085862	SLC15A3	16.086	38.4205		ILMN_2224907	C4orf34	13.6639	26.1569							ILMN_2356955	PLAGL1	6.24976	27.5284		ILMN_1802905	PIAS4	7.40242	6.27535
ILMN_1682857	NDUFAF2	15.9339	14.8433		ILMN_1748970	PRR15L	7.25837	6.24117							ILMN_2313851	OSBPL9	16.7364	23.0257		ILMN_2230892	IL10RB	21.9265	32.5455		ILMN_1812250	LOC644642	11.3235	28.4782							ILMN_1813240	EIF1AX	12.3844	21.2777		ILMN_2384807	LRRCC1	8.1337	5.52246
ILMN_2061043	CD48	23.3761	7.37116		ILMN_2112730	SLC9A4	6.10745	6.77631							ILMN_2161357	C6ORF111	16.7401	22.9882		ILMN_1740875	FPR2	19.7175	34.7433		ILMN_2068435	ZNF700	11.8511	27.7839							ILMN_2112580	FCGR3A	15.8451	17.806		ILMN_1708098	LIX1L	6.74697	6.85658
ILMN_1689953	CD81	17.8877	12.8478		ILMN_1747160	SYT15	6.10123	6.77592							ILMN_2383934	ITGB1	13.5585	26.0993		ILMN_2038776	TXN	19.4367	34.814		ILMN_1677239	CCDC14	19.7261	19.5024							ILMN_1675541	EEF1B2	9.82545	23.8222		ILMN_2283388	C20orf24	6.37141	7.22709
ILMN_2076640	KHDRBS1	20.0834	10.6516		ILMN_2308689	AGBL5	6.56548	5.85611							ILMN_2387799	PDPK1	9.63119	29.9206		ILMN_1653498	IGSF6	9.64457	44.5622		ILMN_1757106	2012-03-06	6.0632	33.1025							ILMN_1703844	DYNC1LI1	6.72989	26.8554		ILMN_1780382	LOC653566	6.7014	6.87416
ILMN_2310589	DIABLO	11.0179	19.7085		ILMN_1715931	ISCA1	5.50851	6.88703							ILMN_1713178	FAM116A	12.0161	27.4374		ILMN_1673604	YIPF3	14.3438	39.7648		ILMN_1692826	UNKL	16.6653	22.3496							ILMN_2117223	ROD1	19.2127	14.2378		ILMN_1775743	BTG1	6.98783	5.92886
ILMN_2141453	RPL18A	18.4811	12.2305		ILMN_1761961	CCDC90A	5.65329	5.82026							ILMN_1720422	G3BP2	8.29185	31.0829		ILMN_1815445	IDS	10.6523	43.4327		ILMN_1708414	GNL3L	5.71697	33.2746							ILMN_1700674	LOC728481	16.4568	16.9937		ILMN_1658911	LOC647349	6.7572	6.05223
ILMN_2218277	RPS2	23.5244	7.17379		ILMN_1733807	IGF2BP1	5.5563	5.89551							ILMN_1673138	ZBTB33	12.6938	26.6726		ILMN_1714650	RASGRP4	19.6091	34.3614		ILMN_2405233	FAM133B	11.7019	26.7512							ILMN_2056167	OSTC	21.1049	12.1926		ILMN_1718712	C20orf177	5.85752	6.92945
ILMN_1686871	PARP1	15.7441	14.9139		ILMN_2190851	PPID	5.54236	5.83151							ILMN_2063586	CLIC4	8.75031	30.5917		ILMN_1801710	APBB1IP	24.217	29.6798		ILMN_1697639	OGT	27.1528	11.2185							ILMN_1751589	NUDCD2	6.30676	26.8184		ILMN_1786532	CNIH	6.20309	6.5051
ILMN_1772261	GLG1	16.9984	13.58												ILMN_1676842	BTAF1	9.84218	29.3891		ILMN_1708934	ADM	26.8769	27.005		ILMN_1739283	UPF2	25.2393	12.9006							ILMN_1798940	LOC644131	6.6583	26.41		ILMN_1675130	NFIC	6.1207	6.58709
ILMN_2196078	SLAMF6	16.0982	14.4674												ILMN_2357770	TCEA1	15.3983	23.8325		ILMN_2344204	PRR13	16.4371	37.3864		ILMN_1669657	LOC440345	22.6784	15.3308							ILMN_2373073	LIG4	11.4008	21.6417		ILMN_1775405	ARL4A	6.24083	6.40307
ILMN_2386530	RPLP1	19.7297	10.8217												ILMN_2389155	UGP2	9.41777	29.7865		ILMN_1757129	TMEM88	19.5704	34.1403		ILMN_1697629	PLA2G4B	24.9254	13.0591							ILMN_1769757	C14orf104	6.08948	26.9073		ILMN_1661799	HIGD1A	6.0526	6.05922
ILMN_2316540	MRPL11	14.3448	16.1389												ILMN_1673788	CDV3	11.5792	27.6104		ILMN_1758371	IL1R2	13.7112	39.9068		ILMN_1684929	TOPBP1	9.51589	28.3638							ILMN_1734696	FRG1	16.9713	15.7325
ILMN_2338785	RPS14	12.6831	17.7802												ILMN_1694491	CCNG1	14.4547	24.7095		ILMN_1741148	ALDOA	17.1298	36.3695		ILMN_1734153	GDI1	11.8196	26.0311							ILMN_1696839	RPS27	14.3437	18.344
ILMN_1790757	ADSL	19.686	10.768												ILMN_1759801	DPP8	16.0145	23.1334		ILMN_1777342	PREX1	21.5279	31.8748		ILMN_2374244	DYRK2	17.7772	19.9946							ILMN_1700896	SAP30	15.2083	17.4261
ILMN_1658802	KRTCAP2	21.9498	8.4837												ILMN_1710906	RNF145	9.86038	29.2744		ILMN_2087303	XKR8	22.4638	30.8276		ILMN_1689400	CLK1	22.5226	15.2435							ILMN_1711408	ANXA4	9.60342	22.9836
ILMN_2312709	LCMT1	22.0405	8.32938												ILMN_1693220	AKAP11	9.70804	29.3866		ILMN_2374340	PLAUR	18.6988	34.5867		ILMN_1814074	PHKA2	16.0745	21.674							ILMN_1772998	LOC647436	17.0352	15.5417
ILMN_1689725	RPLP1	18.7128	11.6464												ILMN_2348788	CD44	12.1856	26.8784		ILMN_1671885	MLF2	24.6487	28.6102		ILMN_1695719	EIF2C2	5.70616	31.6355							ILMN_2128923	HCCS	13.2513	19.2382
ILMN_1699991	LCK	19.626	10.7047												ILMN_1778104	ACADM	6.1326	32.8977		ILMN_1733997	SIRPB1	22.2278	31.0023		ILMN_1747968	RBM33	25.1032	12.182							ILMN_1749253	TUBD1	8.08003	24.3927
ILMN_1718672	NHP2	20.1952	10.086												ILMN_1657153	ACTR3	8.76273	30.2628		ILMN_1654560	TLR6	16.7019	36.3442		ILMN_1731113	ZBTB43	13.2315	23.1817							ILMN_2398474	RAP1B	9.43834	22.9903
ILMN_2224143	MCM3	13.841	16.4177												ILMN_1707506	YTHDC1	16.5963	22.3958		ILMN_1793729	C15orf39	19.3652	33.5572		ILMN_2113535	PCYOX1	22.2665	14.1041							ILMN_2134453	FCGR3B	20.532	11.852
ILMN_2141452	RPL18A	18.1693	12.0752												ILMN_1798346	KIAA1468	14.9965	23.9223		ILMN_1660021	M6PRBP1	13.5155	39.4021		ILMN_1734483	BSDC1	11.3458	24.9727							ILMN_2131523	SACS	8.70025	23.6163
ILMN_1801913	PPIH	18.2617	11.9456												ILMN_1672006	SSB	9.56939	29.33		ILMN_1713749	CORO1A	17.6832	35.2057		ILMN_1670539	LOC92017	14.6637	21.3876							ILMN_2094938	OMA1	7.12154	25.1926
ILMN_2345872	SUMF2	10.3264	19.8151												ILMN_1771333	CD47	9.31947	29.5245		ILMN_2334693	NARF	14.5372	38.2726		ILMN_1740165	C14orf102	17.0042	18.9134							ILMN_1662409	LOC440525	9.02716	23.2829
ILMN_1753112	CD5	24.4036	5.66428												ILMN_1761519	EIF4G2	13.8452	24.8967		ILMN_1797875	ALOX5AP	22.0508	30.7169		ILMN_1795428	WDR59	14.3934	21.2135							ILMN_1796099	LOC644380	10.2143	22.0795
ILMN_2058070	NEDD8	10.5777	19.4698												ILMN_1795715	DPYD	8.45375	30.2704		ILMN_1672114	TNFRSF10C	15.1521	37.4977		ILMN_2285112	FBXO11	9.9608	25.3446							ILMN_1700880	LOC648399	7.18551	25.0585
ILMN_1735360	SDAD1	22.0026	8.00969												ILMN_1664010	ELF1	13.1366	25.5387		ILMN_1714643	MGAM	24.9447	27.6627		ILMN_1756086	INTS3	8.00757	27.0348							ILMN_1675669	IBTK	16.2854	15.9107
ILMN_2109156	RANBP1	16.3269	13.6609												ILMN_1676159	MST4	9.2375	29.3822		ILMN_1655702	ABHD5	28.1097	24.4789		ILMN_1788689	PHIP	9.70248	25.1876							ILMN_2104784	FKBP3	15.3773	16.6892
ILMN_2355665	MTP18	19.4828	10.4689												ILMN_1756104	LARP7	13.19	25.4227		ILMN_1703074	CPD	21.1252	31.4399		ILMN_2124386	RGL2	13.5917	21.239							ILMN_1663493	C7orf28B	8.1092	23.9429
ILMN_1702301	DOCK10	19.3578	10.5351												ILMN_1728467	GHITM	13.8038	24.8001		ILMN_1790891	CKAP4	14.4411	38.0388		ILMN_2048793	CIAO1	11.6176	23.0117							ILMN_1668861	LOC732165	6.46064	25.2507
ILMN_1785424	ABLIM1	18.1281	11.6709												ILMN_1691097	HSP90AA1	9.44255	29.157		ILMN_1688158	CYB5R4	16.6833	35.7924		ILMN_1671839	TAF1C	11.5564	22.9914							ILMN_1655710	LOC642989	22.7644	8.84417
ILMN_2166831	RPS4X	23.1048	6.6528												ILMN_1664153	SLC30A5	5.58565	32.9824		ILMN_1699772	RRAGD	17.2444	35.2311		ILMN_1722066	ARMC1	7.63263	26.757							ILMN_1745005	GGCT	5.5293	26.0597
ILMN_1761138	C9orf142	11.6406	18.1039												ILMN_1801767	ABHD3	8.52796	29.9515		ILMN_1763837	ANPEP	22.1511	30.1252		ILMN_2143822	ZNF148	8.21598	25.8453							ILMN_1686884	IL1RAP	7.74047	23.8422
ILMN_1692473	PRMT1	19.8792	9.76979												ILMN_1701269	ATP5C1	6.56491	31.8843		ILMN_1673282	LAMP2	31.2681	20.9861		ILMN_1743204	DUSP8	8.12086	25.9306							ILMN_2212156	PPIG	12.4831	19.0778
ILMN_2179018	NDUFAB1	17.7081	11.9065												ILMN_1809086	XRN1	9.95742	28.49		ILMN_1672589	SEMA4B	29.5086	22.6994		ILMN_1789999	SLC30A7	14.9981	19.0012							ILMN_1727287	PHF20L1	7.54588	23.9987
ILMN_1719906	HADH	15.6074	13.8087												ILMN_1779633	PSMD6	7.08152	31.3586		ILMN_1665217	C3orf34	19.7177	32.4174		ILMN_2371590	DDX17	16.5151	17.4763							ILMN_2412380	TSC22D1	13.1634	18.3757
ILMN_1658464	GTF3A	17.8754	11.5107												ILMN_1760954	DENR	10.2556	28.1017		ILMN_1718988	DAZAP2	12.5524	39.502		ILMN_1789106	IPP	13.2158	20.772							ILMN_1664718	CYP51A1	6.89862	24.6361
ILMN_1778242	CALM1	15.6755	13.6811												ILMN_1673023	EP400	13.4713	24.8684		ILMN_1738749	MAST3	18.1736	33.8139		ILMN_1746012	MBD6	13.4312	20.5029							ILMN_2226314	DBR1	9.07371	22.4547
ILMN_2371964	MRPS12	20.2248	9.12999												ILMN_1695797	NCOA6	9.05992	29.2345		ILMN_1715698	MGC71993	12.4494	39.5004		ILMN_1737561	LOC88523	11.3254	22.5326							ILMN_2181883	C14orf129	6.86568	24.6443
ILMN_1673711	HSP90AB1	20.8548	8.44674												ILMN_1734833	NBN	7.30582	30.983		ILMN_1778226	EXTL3	13.9433	37.9327		ILMN_1754211	DCLRE1C	12.9261	20.9154							ILMN_1719392	FH	11.7836	19.6434
ILMN_1672366	PIGY	21.8735	7.33021												ILMN_2338480	RHOT1	13.6821	24.578		ILMN_1667260	MAPK3	17.5189	34.347		ILMN_1699545	PCSK7	16.4335	16.969							ILMN_1752008	OTUD1	8.54869	22.8451
ILMN_1712678	RPS27L	12.2318	16.8094												ILMN_2054442	ZNF146	7.5378	30.6848		ILMN_1679428	CHIC2	22.165	29.699		ILMN_1669599	DENND4C	12.2675	21.0403							ILMN_2172588	IKBKB	7.75731	23.5631
ILMN_1815124	LOC645317	8.94544	20.0766												ILMN_2072541	RAB11FIP2	10.5035	27.5779		ILMN_2307740	CD46	21.859	29.977		ILMN_1743829	ATXN2	13.5668	19.4652							ILMN_1691789	SMNDC1	10.6529	20.5709
ILMN_1728298	SBK1	19.7709	9.2498												ILMN_1770084	TACC1	13.8847	24.1727		ILMN_1812618	ARAP3	26.0452	25.7632		ILMN_2094587	USP8	5.5565	27.0175							ILMN_1768394	ARPC5	9.48853	21.7063
ILMN_1814859	DDX47	22.8052	6.21277												ILMN_1773117	BCOR	13.0129	25.0201		ILMN_1696463	SPI1	31.1281	20.6468		ILMN_2246510	TSC1	10.7157	21.8407							ILMN_1666420	ZNF679	8.07539	23.045
ILMN_1755364	RALA	16.3127	12.6682												ILMN_1753819	RFFL	7.5899	30.3968		ILMN_1787843	HSDL2	17.8275	33.8717		ILMN_1784766	MCM3AP	7.23706	25.304							ILMN_2231985	HSPA13	6.9353	24.143
ILMN_1748018	GORASP2	20.0669	8.85622												ILMN_2364828	OGT	19.5673	18.4047		ILMN_1773125	ENTPD1	13.9212	37.6641		ILMN_1721741	ATPBD1B	5.61222	26.8148							ILMN_1673638	RPS3A	7.04734	24.0014
ILMN_1796235	CIRH1A	19.3569	9.55974												ILMN_1746457	GTF3C2	7.13689	30.8283		ILMN_1814985	PDLIM7	20.9313	30.5427		ILMN_1671969	UGP2	6.93845	25.2929							ILMN_2135991	C16orf69	8.6259	22.25
ILMN_1660577	ATP5G2	21.8241	7.07815												ILMN_1780132	PELI2	9.26906	28.6621		ILMN_2211065	TMEM91	19.1088	32.3388		ILMN_1705679	SAFB2	15.117	17.0914							ILMN_2357382	TERF1	6.81278	23.9063
ILMN_1718136	UQCRHL	13.0207	15.879												ILMN_1798354	PAPOLA	12.945	24.6992		ILMN_1682165	NT5C2	19.2238	32.1983		ILMN_1732053	SNRNP70	20.5933	11.5385							ILMN_1753892	LOC654121	9.49778	21.1795
ILMN_1688127	LOC341457	17.9997	10.7888												ILMN_1652521	MTMR9	13.2367	24.3319		ILMN_1763452	EVI2B	25.9534	25.3543		ILMN_1726636	HECTD2	23.0515	8.94686							ILMN_1802649	C11orf58	7.34997	23.3256
ILMN_1726410	APRT	18.6987	10.0732												ILMN_2117904	ZNF22	5.94283	31.62		ILMN_1748767	LOC730740	18.2792	33.0016		ILMN_1810225	KIAA1530	7.6764	23.8411							ILMN_2400297	MAPK9	8.84356	21.7994
ILMN_1688971	NOL11	16.4126	12.3545												ILMN_2170353	PTPLB	11.535	26.0244		ILMN_2279961	LAMP2	21.6528	29.5832		ILMN_1668526	GVIN1	10.83	20.5693							ILMN_1764163	LOC644330	17.6552	12.9817
ILMN_1737862	PSMB4	15.6912	13.0271												ILMN_1683178	JAK2	12.5433	24.977		ILMN_1765493	SHKBP1	16.8848	34.2458		ILMN_1727287	PHF20L1	20.2296	11.1677							ILMN_2347888	LARP4	6.20856	24.4053
ILMN_2201533	C17orf61	10.315	18.4014												ILMN_1739622	PPP1R12A	11.1757	26.3313		ILMN_1766245	SUPT4H1	8.80884	42.1957		ILMN_1715392	PRPF3	22.5675	8.56901							ILMN_1757702	LOC647673	17.6253	12.9228
ILMN_1668996	C1QBP	18.5899	10.0743												ILMN_2230016	HIGD1A	6.72383	30.7606		ILMN_1790689	CRISPLD2	23.5058	27.316		ILMN_1706825	PKN2	15.3309	15.7435							ILMN_2062370	NOL8	13.1781	17.3537
ILMN_1738656	GLOD4	20.039	8.58182												ILMN_2357577	PRKAA1	11.6229	25.7591		ILMN_2391976	SLC45A4	11.767	39.0496		ILMN_2358783	ASB3	12.2421	18.7875							ILMN_2059452	SLC12A2	5.56891	24.9568
ILMN_1657632	ZMYM6	19.2745	9.34599												ILMN_1697585	ACTR6	6.23873	31.0973		ILMN_1748651	PSMB3	7.66375	43.067		ILMN_1657011	LOC286208	15.8884	14.7911							ILMN_2066849	FAM26F	10.8513	19.672
ILMN_1661346	LOC648210	19.5064	9.09341												ILMN_1784523	ATP6V1G1	7.10654	30.2096		ILMN_1753712	STX10	21.0952	29.601		ILMN_1697971	TRIM38	13.0132	17.6156							ILMN_1695588	HNRPC	14.2861	16.1148
ILMN_1664610	LOC402057	20.1867	8.38709												ILMN_1711766	SKP1A	6.1574	31.1458		ILMN_1796642	NCF2	21.7399	28.8834		ILMN_1686626	BAT1	16.3495	14.2139							ILMN_1670439	FYTTD1	11.6028	18.7896
ILMN_1690706	SNRPB2	13.4762	15.0426												ILMN_1798543	STK17B	11.8806	25.4056		ILMN_1801307	TNFSF10	13.1085	37.4759		ILMN_1707434	LOC653778	6.05347	24.4441							ILMN_2135272	GIMAP2	8.26411	22.0366
ILMN_2342579	IL7R	19.8469	8.61981												ILMN_2328280	ACTL6A	10.1226	27.0877		ILMN_2363586	SDCBP	24.1385	26.4362		ILMN_1651254	LPP	7.37933	22.8069							ILMN_2090607	IRF2	8.73197	21.4393
ILMN_1676792	LOC645138	17.0506	11.2979												ILMN_2180682	MTPN	11.126	26.0731		ILMN_1804419	LRMP	19.9188	30.6363		ILMN_1664802	WSB1	14.2259	15.9325							ILMN_1714756	YIPF5	8.42987	21.6413
ILMN_2117904	ZNF22	17.7466	10.5822												ILMN_1661833	ANKRD12	12.2429	24.8914		ILMN_1681520	DGAT2	7.71493	42.776		ILMN_1811104	KTELC1	9.33151	20.7905							ILMN_2396996	PPCS	19.7785	10.2752
ILMN_1656292	LOC388532	10.2707	18.0563												ILMN_1681890	DYNLT3	7.49288	29.5901		ILMN_1654060	MKNK2	20.0174	30.4302		ILMN_1654518	LRCH4	18.0608	11.783							ILMN_2352036	RTN4	18.9541	10.905
ILMN_1754303	RPL30	19.4315	8.82609												ILMN_1653504	EDG1	5.66259	31.3767		ILMN_1732967	KIAA1949	20.829	29.5799		ILMN_1738239	RBM6	17.9105	11.9151							ILMN_2184708	LIN7C	9.22127	20.6377
ILMN_1714623	TOMM22	21.0386	7.20543												ILMN_1694240	MAP2K1	8.91278	28.1231		ILMN_1772233	CENTD2	12.8792	37.4194		ILMN_1735827	NISCH	6.00792	23.7856							ILMN_2181060	CKAP2	7.20642	22.4567
ILMN_1764494	ATP5A1	17.9554	10.2355												ILMN_1802519	VPS36	15.0645	21.9176		ILMN_1707286	FLJ22662	16.9927	33.2462		ILMN_2209578	CTGLF3	13.3925	16.3481							ILMN_1661346	LOC648210	15.4809	14.134
ILMN_2402272	TCEAL8	16.3547	11.824												ILMN_1719097	C18ORF8	14.665	22.2921		ILMN_2404154	SERPINA1	12.2482	37.97		ILMN_2196347	CDKN1B	8.57875	20.6246							ILMN_1692535	DPP4	6.58056	23.0329
ILMN_1652754	ZNF428	12.782	15.3642												ILMN_1665730	ABCB10	17.1311	19.8132		ILMN_1743570	CEACAM3	24.0372	26.0897		ILMN_1654583	CHD1	8.80276	20.3341							ILMN_2401701	PCGF6	6.50386	23.0949
ILMN_1803853	NOL7	14.8664	13.2701												ILMN_1815051	API5	8.37655	28.5675		ILMN_1767509	DEF8	26.7155	23.2919		ILMN_1786893	RBM5	18.4763	10.6564							ILMN_2133713	FAM76A	7.30833	22.2711
ILMN_1683664	LOC650369	20.712	7.4234												ILMN_1784946	ORC3L	8.8853	27.9186		ILMN_1745778	SLC45A4	25.4561	24.5267		ILMN_1790962	RINL	15.6806	13.3408							ILMN_1809662	LOC440145	6.4996	22.8327
ILMN_1785095	ATP6V0E2	22.3732	5.70424												ILMN_1793433	RAB10	12.0528	24.739		ILMN_1768031	DEDD2	19.1249	30.8333		ILMN_1719290	CRYZL1	19.8906	9.10598							ILMN_1804611	C12orf23	6.21256	23.0224
ILMN_1736814	CLNS1A	16.8512	11.1934												ILMN_2091375	KRCC1	11.7169	25.0722		ILMN_2364110	GBA	8.034	41.9104		ILMN_1676625	SS18L1	16.2575	12.5925							ILMN_1694877	CASP6	13.5504	15.6471
ILMN_1777066	NIF3L1	18.7004	9.31062												ILMN_2329834	RBM12	10.9541	25.8279		ILMN_1699015	H3F3A	17.296	32.5577		ILMN_2252705	VPS13B	9.91278	18.8037							ILMN_2067269	RECK	7.33027	21.6728
ILMN_2365544	NHP2	22.4061	5.55806												ILMN_1720303	OSTM1	14.5896	22.0512		ILMN_1655414	TNFSF14	16.3207	33.4705		ILMN_2357577	PRKAA1	7.29833	21.3937							ILMN_1741564	DCTN4	8.70916	20.256
ILMN_1728605	TTC3	21.7995	6.11167												ILMN_1678671	KLHL24	7.4305	29.1993		ILMN_2086077	JUNB	17.4769	32.2865		ILMN_1777895	LRRC37B	15.244	13.4471							ILMN_1705468	PIK3CA	9.47222	19.3953
ILMN_2103295	TINP1	20.8076	7.04181												ILMN_1770515	UBE2V2	6.6775	29.8688		ILMN_1662741	EDG4	21.0969	28.6452		ILMN_2182482	SHCBP1	8.3906	20.2757							ILMN_2110829	LOC441743	14.5192	14.3418
ILMN_1689001	CDK4	16.3202	11.5269												ILMN_1688629	ZNF274	6.57851	29.9437		ILMN_1699496	PHF21A	20.8679	28.7067		ILMN_1686662	C15orf28	20.4893	8.16044							ILMN_2232121	GPR65	11.9628	16.863
ILMN_2336186	LCMT1	14.0419	13.7436												ILMN_1710326	CLDND1	13.5615	22.9291		ILMN_1752340	ARF5	9.28963	40.2121		ILMN_1783448	DYNC1LI2	12.6697	15.9508							ILMN_2088990	CXorf21	5.93341	22.8353
ILMN_2246956	BCL2	15.0383	12.6613												ILMN_2371590	DDX17	7.51542	28.9476		ILMN_2413508	CD97	10.3796	39.0577		ILMN_1742578	MKLN1	10.3299	18.2906							ILMN_1688455	KIAA0564	7.06829	21.6659
ILMN_2371147	BCL7C	16.1868	11.5077												ILMN_2370825	ATM	7.56484	28.8618		ILMN_1760347	SRGN	17.9163	31.5128		ILMN_1807972	MICAL1	10.6066	17.8911							ILMN_2190051	CCDC91	8.93884	19.7839
ILMN_1690802	TRMT112	20.4846	7.1003												ILMN_1720442	NCBP2	8.9731	27.4113		ILMN_1688231	TREM1	17.7668	31.4211		ILMN_1739259	UBE4A	7.58922	20.8958							ILMN_2130525	TSPAN13	8.43671	20.284
ILMN_1747058	TRAPPC2L	10.4953	17.0265												ILMN_1777895	LRRC37B	13.6527	22.6737		ILMN_1756982	CLIC1	12.4234	36.7532		ILMN_2373266	SFRS12	12.1308	16.0667							ILMN_1664910	RPSA	8.20004	20.4919
ILMN_1797074	EMG1	13.266	14.2244												ILMN_1654583	CHD1	9.34959	26.9752		ILMN_2392569	FPR2	16.2883	32.8289		ILMN_2320250	NOL6	9.75427	18.2162							ILMN_2357193	DDX59	8.11921	20.5283
ILMN_2181892	BEX2	18.9433	8.43661												ILMN_1692121	USO1	7.71586	28.596		ILMN_1658121	CFP	13.5107	35.5928		ILMN_1705783	NXF1	14.0233	13.879							ILMN_1709396	PDCD10	5.93673	22.7067
ILMN_1744147	CEBPZ	17.5322	9.78147												ILMN_2177090	NBPF11	14.9644	21.3174		ILMN_1804935	VNN3	22.1419	26.9367		ILMN_1686750	MGEA5	16.1528	11.6541							ILMN_1778691	TIA1	6.0327	22.6052
ILMN_1662364	AARS	16.4709	10.7849												ILMN_2223380	PPWD1	15.1662	21.1096		ILMN_1721876	TIMP2	25.4363	23.6119		ILMN_1811574	MAPK8IP3	10.371	17.188							ILMN_2396011	CEP63	9.09949	19.5212
ILMN_1696087	PHB2	19.4482	7.78653												ILMN_1660579	CRLF3	10.7618	25.4536		ILMN_1670272	LRP10	29.726	19.1275		ILMN_2102960	KIAA1370	14.799	12.7284							ILMN_1736054	SUB1	10.167	18.4196
ILMN_1664167	RPF2	16.2152	10.9864												ILMN_1651513	SKIV2L2	5.99663	30.2173		ILMN_2371169	ZYX	21.4511	27.3957		ILMN_1742400	CEP350	8.45312	19.0299							ILMN_1656486	DNAJC10	8.61747	19.9568
ILMN_1678775	CLEC2D	13.5926	13.5353												ILMN_1876924	WNK1	10.9211	25.2334		ILMN_1680314	TXN	18.3935	30.4047		ILMN_1811117	LOC400986	10.2676	17.0041							ILMN_1747630	DEK	11.1381	17.3322
ILMN_1777519	ITGB7	18.2353	8.82059												ILMN_1737426	PCMTD1	11.654	24.3734		ILMN_1780598	PIAS1	10.3747	38.3887		ILMN_2129545	GNB4	15.9835	11.2271							ILMN_1666007	TRAPPC6B	6.57665	21.8452
ILMN_1810782	SH3KBP1	11.3306	15.6528												ILMN_1685140	PRRC1	6.26682	29.7457		ILMN_1781468	SMAP2	12.9562	35.7953		ILMN_2410038	FAM111A	15.2366	11.9733							ILMN_2156172	HK2	12.9977	15.2972
ILMN_2357361	THYN1	18.7531	8.19004												ILMN_1697200	MON2	9.56881	26.4313		ILMN_1768505	IL13RA1	12.4237	36.2834		ILMN_2375319	RASGRP2	6.23496	20.9034							ILMN_1717180	MTMR6	13.5202	14.7364
ILMN_2320330	MAL	15.9019	11.0091												ILMN_1753608	TMEM131	18.5481	17.4383		ILMN_1796316	MMP9	23.0089	25.5842		ILMN_1672940	ZNF562	7.39603	19.4558							ILMN_1759084	INTS8	14.4395	13.789
ILMN_1737015	RPL39	12.7178	14.1677												ILMN_2336982	NPTN	9.99644	25.892		ILMN_2235283	MAPK1	14.1845	34.1821		ILMN_2394250	PLEKHA1	10.0494	16.7356							ILMN_2153332	ATXN1	7.23603	20.96
ILMN_2167617	NACA	16.4562	10.3604												ILMN_1813400	CBR4	8.29618	27.5851		ILMN_1764456	TECPR2	15.206	33.0745		ILMN_1753467	SAMD4B	10.1277	16.511							ILMN_1751760	BCAS2	6.34381	21.8295
ILMN_1701293	COX7A2	10.0684	16.729												ILMN_1748077	DDX59	9.51779	26.3357		ILMN_2393296	GK	12.0721	36.1939		ILMN_1677843	RAB24	13.1755	13.3928							ILMN_1718832	SPHAR	6.78391	21.3602
ILMN_1731619	DAD1	18.4988	8.23204												ILMN_1798602	PCF11	10.0541	25.7686		ILMN_1719403	MTX1	12.0522	36.2071		ILMN_2260756	GSDMB	10.5669	15.9009							ILMN_2398388	APH1A	8.23473	19.7708
ILMN_1676548	BZW2	19.4344	7.2824												ILMN_2125374	CMAS	13.5657	22.1955		ILMN_1659753	LAMP2	21.7854	26.4569		ILMN_1731922	LOC644931	20.709	5.74101							ILMN_1711729	LOC442454	10.7104	17.2258
ILMN_1686194	SDCCAG10	19.0879	7.58488												ILMN_1711069	YPEL5	10.5255	25.2227		ILMN_1744795	TBL1X	28.4004	19.8		ILMN_1676955	TYK2	17.1369	9.26782							ILMN_2405023	PPP1CB	8.03303	19.7909
ILMN_2210837	CDC26	7.68357	18.9071												ILMN_2092664	ADSS	11.5411	24.1519		ILMN_2327795	RERE	23.2422	24.9228		ILMN_1738579	VHL	8.33138	18.0683							ILMN_1706117	LOC391656	6.04292	21.743
ILMN_1683562	SNRPG	13.5668	12.9986												ILMN_1725594	C10ORF97	10.9476	24.7376		ILMN_1779015	ZNF467	23.4105	24.705		ILMN_1664644	ATG16L2	10.0718	16.3183							ILMN_1654866	RANBP2	6.98323	20.7514
ILMN_1704477	COX5A	12.98	13.5748												ILMN_1806634	NNT	10.7006	24.9277		ILMN_1704870	PGLYRP1	19.1182	28.8795		ILMN_1670263	C1orf71	7.65462	18.6516							ILMN_1789074	HSPA1A	12.4026	15.3281
ILMN_1791896	EBAG9	17.4947	9.04749												ILMN_1661485	RBM34	17.8522	17.7571		ILMN_2149494	NPL	12.7473	35.2136		ILMN_1657398	LOC284757	6.0048	19.7615							ILMN_1777139	MAK16	6.55576	21.1475
ILMN_2374249	DYRK2	18.4003	8.10436												ILMN_2411264	BTBD1	9.63965	25.9598		ILMN_1691572	TST	13.9309	33.994		ILMN_1801040	SPN	14.1887	11.5408							ILMN_2053546	LOC653314	15.138	12.467
ILMN_1656399	TCEAL8	15.0261	11.453												ILMN_1720241	TRIP12	8.493	27.1044		ILMN_1710514	BCL3	28.6298	19.1065		ILMN_1738749	MAST3	8.6082	16.9658							ILMN_2258471	SLC30A5	6.3995	21.1322
ILMN_1778010	IL32	11.9384	14.5232												ILMN_1697906	WBP4	8.57072	27.0267		ILMN_1700231	IP6K1	14.3062	33.3436		ILMN_1690963	ASAP1	6.33989	19.1533							ILMN_2113362	ARL6IP1	11.4368	15.9719
ILMN_2101885	TUBB	17.076	9.35815												ILMN_2393046	NHLRC3	9.03706	26.5397		ILMN_1656335	RIT1	18.9021	28.69		ILMN_1693225	LOC646897	8.26579	17.2244							ILMN_1681798	2012-09-06	6.62943	20.597
ILMN_1798957	C12orf47	11.8191	14.5969												ILMN_2062112	ZC3H15	9.11219	26.3947		ILMN_1812967	CNPY3	20.0734	27.4968		ILMN_1785852	OBFC2A	6.85991	18.6017							ILMN_2338921	C4orf41	7.85824	19.3529
ILMN_1660376	LOC387841	16.5842	9.82391												ILMN_2324157	UBA3	9.92438	25.5789		ILMN_2226917	KIAA0247	23.4867	24.0554		ILMN_2061950	RABGAP1	7.41144	18.0118							ILMN_2180582	PNPLA8	8.9875	18.2107
ILMN_1689389	SF3B5	12.2752	14.1243												ILMN_1773561	RAP2C	14.4633	21.036		ILMN_2197365	RGS2	31.5878	15.8555		ILMN_1724066	PLCB2	11.4863	13.896							ILMN_1695872	LOC641992	7.619	19.5204
ILMN_1656791	RPS6	16.5298	9.8692												ILMN_1766024	PDCD10	7.79486	27.6804		ILMN_2083946	TGFA	17.9455	29.4509		ILMN_2095660	TMEM156	10.1941	15.1835							ILMN_1708164	EIF3A	8.9645	18.1435
ILMN_2377669	CD247	14.8959	11.4772												ILMN_1681628	ZNF277	7.07879	28.2399		ILMN_2144573	CTBS	14.7213	32.569		ILMN_1686135	CCDC45	11.0972	14.2613							ILMN_1755077	HEBP2	13.0912	14.0099
ILMN_1738383	EEF2	9.55084	16.8179												ILMN_1680129	NSUN2	11.9947	23.3117		ILMN_1806165	HSPA6	17.7482	29.5385		ILMN_1812557	CDK5RAP3	13.4062	11.8887							ILMN_2371590	DDX17	13.8291	13.2587
ILMN_2195236	PGRMC2	14.7998	11.5465												ILMN_1736340	ANGEL2	10.9629	24.3202		ILMN_2050911	SLC22A4	12.476	34.6959		ILMN_1721729	PPARBP	10.6388	14.6162							ILMN_2362581	FNDC3A	6.56986	20.462
ILMN_1662318	CCDC59	15.0406	11.2662												ILMN_2162328	PTS	10.1463	25.1056		ILMN_2151281	GABARAPL1	21.3395	25.8197		ILMN_1720850	BAZ2B	7.86483	16.9621							ILMN_1718853	UQCRC2	11.4624	15.5546
ILMN_1656378	NMT2	12.1063	14.1808												ILMN_1741331	C14ORF108	10.1776	25.0154		ILMN_1663422	RGL4	21.8358	25.2413		ILMN_1801303	AMY2A	18.9856	5.83485							ILMN_1761131	PECI	9.21677	17.7477
ILMN_1795285	PHF15	17.916	8.36019												ILMN_1723007	ZCCHC9	6.27133	28.84		ILMN_1733221	C9orf164	24.3275	22.7241		ILMN_1795435	ZNF264	8.04951	16.6395							ILMN_1691485	GTF2H2	7.91961	19.0401
ILMN_1691341	IL7R	19.7006	6.57059												ILMN_1786976	RAB22A	11.2127	23.8302		ILMN_1745148	ZNFX1	12.848	34.0419		ILMN_1767263	LOC158301	13.4898	11.0897							ILMN_1814526	ADD3	11.5156	15.4393
ILMN_1665823	LOC389787	11.8758	14.3785												ILMN_1727361	LEMD3	8.64409	26.3974		ILMN_1697925	APOB48R	13.4573	33.1677		ILMN_2123415	BMP8B	15.9228	8.63105							ILMN_2415439	NAE1	8.50597	18.415
ILMN_1775170	MT1X	17.6387	8.4671												ILMN_1745217	FLJ10081	12.3232	22.7123		ILMN_1741165	SLC11A1	17.8841	28.6803		ILMN_2376667	POFUT2	11.5484	13.0019							ILMN_1725244	HAT1	14.5698	12.3448
ILMN_2117330	NDUFB2	16.2415	9.84645												ILMN_1737146	TRAM1	10.2142	24.7115		ILMN_1794914	UBTD1	9.22556	37.3263		ILMN_1745933	LOC400713	13.4432	11.0083							ILMN_1701837	KLHL2	9.29182	17.6088
ILMN_1704024	TMEM160	12.2387	13.8165												ILMN_2340565	ATP2C1	15.9367	18.9789		ILMN_2148819	TUBA1A	8.37434	38.1606		ILMN_1682818	TTLL3	16.3028	8.12487							ILMN_1652215	LOC644310	6.53558	20.3558
ILMN_2321451	HNRNPD	16.0148	10.0229												ILMN_2061405	NUP54	8.55479	26.2733		ILMN_1755123	GBA	8.46885	37.9553		ILMN_1693538	STK36	8.10088	16.1052							ILMN_2404407	ABAT	7.12555	19.6949
ILMN_1756360	RPL35A	17.5266	8.50946												ILMN_1673275	TRAPPC2	16.112	18.7159		ILMN_1671281	RNASEL	15.3101	31.1025		ILMN_1661432	NUP43	9.15443	15.0467							ILMN_2043569	MOSPD2	7.44189	19.3419
ILMN_1810334	COMMD7	14.0508	11.9325												ILMN_1743711	LOC650215	8.27522	26.5182		ILMN_1689908	ANKRD13A	14.2958	32.1078		ILMN_2147251	MGC10997	13.9818	10.0838							ILMN_1773886	MED21	9.99394	16.6715
ILMN_1658486	MRPL54	7.1721	18.7701												ILMN_1768197	ROD1	11.3654	23.4217		ILMN_1745262	REM2	20.0398	26.3329		ILMN_1807234	ZNF700	7.0833	16.9738							ILMN_1687410	OSBPL11	13.2001	13.4466
ILMN_1762725	EIF3L	20.3923	5.52672												ILMN_1793651	UBE2N	6.08058	28.6802		ILMN_1749892	EGLN1	18.1107	28.1938		ILMN_1723536	USP33	5.56888	18.4757							ILMN_2088612	XPO4	7.89032	18.7485
ILMN_1671257	DKC1	11.8088	14.0731												ILMN_2076640	KHDRBS1	9.77806	24.9291		ILMN_1676895	BTNL8	12.026	34.2272		ILMN_1814526	ADD3	7.88139	16.0286							ILMN_1671152	LOC649801	13.5859	12.9622
ILMN_2368530	IL32	17.4727	8.37912												ILMN_1696975	USP1	9.77393	24.9291		ILMN_1720053	ZFAND3	15.1096	31.1358		ILMN_1702592	WDR73	15.7424	7.77648							ILMN_1750145	YWHAG	11.8315	14.7148
ILMN_1804328	WWP1	17.1949	8.62763												ILMN_1691789	SMNDC1	7.50774	27.1899		ILMN_1664644	ATG16L2	19.6223	26.5815		ILMN_1678671	KLHL24	6.77184	16.6789							ILMN_2351298	WIPF1	14.126	12.3243
ILMN_1716895	RPA3	12.7381	13.0488												ILMN_1714461	RNF14	9.331	25.3643		ILMN_1663916	ARHGAP9	24.3261	21.8732		ILMN_2121068	ADAM17	15.3679	8.04435							ILMN_1705111	FNDC3A	8.33948	18.0183
ILMN_1686954	RPS10	15.8317	9.93584												ILMN_2395974	PRDX3	7.09663	27.5677		ILMN_2352303	RASSF2	26.102	19.921		ILMN_1719694	LOC729446	6.98311	16.325							ILMN_1708160	KPNA2	5.89977	20.4559
ILMN_1801852	SEC61B	14.7045	11.0141												ILMN_2187487	HEATR5B	17.4831	17.1649		ILMN_1655206	ZBTB34	25.6603	20.3607		ILMN_2120965	NPAT	11.2658	12.0064							ILMN_1711617	GMFG	6.96742	19.3636
ILMN_1786759	C11orf10	16.0877	9.57218												ILMN_1672366	PIGY	7.16652	27.4497		ILMN_1815719	PLCG2	17.5011	28.4402		ILMN_1799890	ZFYVE20	7.97663	15.2377							ILMN_1668657	FLJ38973	5.90446	20.4077
ILMN_1700955	TCTEX1D2	8.4737	17.1275												ILMN_1739259	UBE4A	10.7639	23.7449		ILMN_1670130	ARID3A	24.382	21.5554		ILMN_1802973	ANAPC4	16.6482	6.32886							ILMN_2122669	TOPORS	9.16233	17.0972
ILMN_1739798	C7orf30	13.6273	11.9468												ILMN_2351611	UBQLN1	13.6102	20.8281		ILMN_2398274	PYCARD	11.2113	34.7039		ILMN_1678799	RAPGEF1	11.0174	11.8169							ILMN_1723141	OTUD1	9.37748	16.8306
ILMN_1780141	TMEM66	14.9799	10.5666												ILMN_1796240	KIAA1012	7.36274	27.0424		ILMN_1785852	OBFC2A	15.7534	30.0917		ILMN_1736340	ANGEL2	16.1242	6.53231							ILMN_1705876	NAP1L1	9.36769	16.7736
ILMN_1656537	SNRPN	18.1387	7.39911												ILMN_2353033	FUBP3	12.3558	22.0312		ILMN_2100689	MAP2K4	24.0941	21.7486		ILMN_1750079	PURB	7.65396	14.9845							ILMN_1775473	LOC400652	5.80607	20.2587
ILMN_1653599	ATP5D	9.84092	15.6462												ILMN_1715188	USP8	9.59864	24.7436		ILMN_2144574	CTBS	9.35991	36.3797		ILMN_2383489	CDK5RAP3	10.6583	11.9622							ILMN_1742324	C1orf9	8.16068	17.8667
ILMN_2376205	LTB	11.1838	14.2809												ILMN_2088825	CENTB2	10.6423	23.6528		ILMN_1742521	GRB2	10.9624	34.7301		ILMN_1754279	FBXW7	5.98444	16.6313							ILMN_1701434	RAP1B	8.66552	17.3582
ILMN_1806867	PPM1G	15.9979	9.44884												ILMN_2340259	PDE4B	7.42607	26.8581		ILMN_1801105	PRKCD	22.5784	23.0718		ILMN_1653266	DNAJB14	13.6209	8.98841							ILMN_2134039	ACN9	8.7567	17.2373
ILMN_1703955	FBXO32	19.2776	6.11904												ILMN_1741159	MAP3K8	14.4192	19.8239		ILMN_1724822	LOC399744	23.2277	22.3093		ILMN_1732089	MRI1	15.0058	7.47151							ILMN_1778617	TAF9	6.12646	19.859
ILMN_1784717	RPS19	19.5573	5.83499												ILMN_1714082	CMAS	10.2294	23.9173		ILMN_1732609	KIAA1539	6.09925	39.4159		ILMN_1737611	VAMP1	15.773	6.61999							ILMN_2106931	PPP1R15B	6.10311	19.7763
ILMN_2359453	ERGIC3	17.5031	7.85451												ILMN_2339748	RNF13	7.28004	26.8236		ILMN_2124386	RGL2	19.0669	26.4014		ILMN_1723124	GALK2	14.4921	7.83522							ILMN_1748767	LOC730740	10.0661	15.8072
ILMN_1780397	TRAF3IP3	17.4679	7.85912												ILMN_1788468	ARGLU1	10.5729	23.4845		ILMN_1685057	SLC22A4	8.42317	37.0004		ILMN_2388975	CERK	8.09788	14.0082							ILMN_1786359	LOC346950	8.19397	17.6683
ILMN_1695362	ZNF32	11.5501	13.6622												ILMN_2056975	HPRT1	7.382	26.6036		ILMN_1674402	TMEM71	21.9362	23.4575		ILMN_2394193	C14orf138	11.2203	10.8639							ILMN_2044293	KBTBD7	7.01814	18.8272
ILMN_2038772	RPS9	18.1867	7.01484												ILMN_1782504	MTERFD1	6.38491	27.581		ILMN_1749287	TLR6	11.4426	33.8917		ILMN_1682699	PBX2	12.6165	9.42104							ILMN_1769633	CTSO	11.8553	13.9694
ILMN_2175712	NDUFA11	14.2368	10.9253												ILMN_1724493	LYSMD2	10.8884	23.0218		ILMN_1807042	MARCKS	12.513	32.8211		ILMN_1655983	CDC14A	9.81865	12.1773							ILMN_1782444	YIPF4	10.9947	14.7939
ILMN_1766010	YARS	6.96448	18.1822												ILMN_1708147	TBPL1	9.7322	24.1527		ILMN_1725471	GK	10.489	34.76		ILMN_1767377	LOC153561	12.3084	9.67839							ILMN_2163732	ATG3	6.19875	19.4957
ILMN_2415179	CLSTN1	17.9801	7.15771												ILMN_2228732	CCNG2	6.49148	27.3773		ILMN_1656621	CHMP2A	12.4767	32.7674		ILMN_2394438	FAM177A1	9.04433	12.8794							ILMN_2205211	LOC134997	11.8949	13.6829
ILMN_1795464	LTA	13.2642	11.8664												ILMN_1784292	ANKMY2	5.51808	28.3307		ILMN_1794875	AGPAT9	21.598	23.3135		ILMN_2214197	TP53INP1	6.98299	14.7968							ILMN_1701991	SYNJ1	11.1379	14.3979
ILMN_2189936	RPL36AL	17.1896	7.93087												ILMN_1754279	FBXW7	13.9089	19.9243		ILMN_1765858	CAB39	19.0027	25.8895		ILMN_1770673	AKNA	5.7967	15.9419							ILMN_1794150	LOC654074	9.26301	16.2318
ILMN_1655913	NUCB2	13.119	11.9545												ILMN_2414325	TNFAIP8	14.2899	19.5338		ILMN_1651628	EXOC6	12.2174	32.6204		ILMN_2206272	D2HGDH	14.3386	7.3465							ILMN_1660602	C1orf43	12.6916	12.7166
ILMN_1805028	THOC7	8.03113	17.0336												ILMN_1796537	FYB	5.7381	28.0855		ILMN_1657864	TMUB2	12.1529	32.6781		ILMN_1758831	RNF31	8.24438	13.2837							ILMN_1658182	MEX3C	12.1202	13.1722
ILMN_1653205	C8orf59	12.2099	12.7409												ILMN_1687768	NCOA7	8.58317	25.2385		ILMN_2320850	UBE2D3	10.1678	34.3738		ILMN_1779171	SGSM2	13.8553	7.64935							ILMN_2073235	FTHL12	9.99899	15.1619
ILMN_1724295	LOC643007	12.8777	12.0358												ILMN_1710937	IFI16	9.58779	24.225		ILMN_1652749	ERF	9.661	34.865		ILMN_1797813	SUZ12	7.97871	13.5211							ILMN_2061043	CD48	7.97383	17.1389
ILMN_1785198	POLE3	14.8148	10.0879												ILMN_1689817	LCOR	11.6945	22.1163		ILMN_1721344	MOBKL2A	24.057	20.4059		ILMN_1755138	NEK8	12.0114	9.38591							ILMN_2204297	MUDENG	9.84566	14.9024
ILMN_1715179	SNRPA1	11.9689	12.8889												ILMN_2168449	DHX15	6.62889	27.1787		ILMN_1742456	OSTF1	6.1883	38.2321		ILMN_2350122	TRIM13	11.5032	9.88255							ILMN_2194649	TADA1L	7.29383	17.29
ILMN_1791396	DGCR6	16.746	7.98843												ILMN_1748926	TMEM209	6.56728	27.2326		ILMN_1807529	PADI4	18.2993	26.0711		ILMN_1724407	TACC3	6.6757	14.5203							ILMN_2174369	ELOVL5	11.5848	12.9886
ILMN_1705570	H2AFY2	16.8514	7.84476												ILMN_1759460	TAF7	9.57	24.2241		ILMN_2052163	YIPF1	12.0985	32.2608		ILMN_2195821	C5orf41	10.1057	10.8792							ILMN_2147993	ZNF23	6.8892	17.6727
ILMN_2208413	ARHGAP15	11.0189	13.6536												ILMN_2241775	TROVE2	10.906	22.7226		ILMN_1801776	PSG9	16.4858	27.8198		ILMN_1789492	ZDHHC8	8.91286	12.0605							ILMN_2059505	ARPP19	9.25822	15.2416
ILMN_1726603	ATP5I	9.42821	15.23												ILMN_1793371	KIAA0430	9.62938	23.9597		ILMN_2043265	ZFP106	14.6017	29.6456		ILMN_1716922	DHX16	5.70204	15.2412							ILMN_2096372	ALDH1A1	12.8145	11.399
ILMN_2401779	FAM102A	14.106	10.5104												ILMN_1652123	HMGN1	10.8686	22.7051		ILMN_2382657	ARHGAP9	24.9599	19.1375		ILMN_1740493	TRAF5	13.1049	7.8279							ILMN_1788778	2012-09-11	5.52896	18.6753
ILMN_1772888	LOC645688	15.094	9.50975												ILMN_1774617	NAB1	7.51054	26.0492		ILMN_1766094	MOSPD2	11.4784	32.5637		ILMN_1676241	BCOR	9.5676	11.3337							ILMN_2178618	WDR44	7.33545	16.7291
ILMN_1719316	TMED3	12.0945	12.4743												ILMN_1805474	C1ORF131	12.4678	21.0914		ILMN_1684034	STAT5B	14.2117	29.8043		ILMN_2254635	ITGAX	6.2127	14.4845							ILMN_1696708	C14orf166	13.559	10.3896
ILMN_1747303	DDX39	12.2527	12.305												ILMN_1689908	ANKRD13A	9.59	23.9436		ILMN_2148847	AKIRIN2	19.3558	24.6077		ILMN_1784540	KBTBD2	8.15738	12.4994							ILMN_1793950	P704P	15.9606	7.9357
ILMN_2122952	CISD1	14.7394	9.81046												ILMN_1806778	UBE2E1	8.86454	24.6656		ILMN_1779376	GSK3B	18.6699	25.2731		ILMN_1797375	KLF12	8.27773	12.3297							ILMN_2322806	CAST	9.42529	14.4195
ILMN_2072603	MRPL14	8.56219	15.962												ILMN_1691760	FAM45A	10.8012	22.7015		ILMN_1689160	DPEP2	15.3891	28.5236		ILMN_2074748	HAL	7.59038	12.9513							ILMN_2170595	RRM2B	8.35731	15.4691
ILMN_2076600	ITM2A	16.3276	8.06449												ILMN_2170949	SNX10	7.20169	26.2679		ILMN_1678766	DYNLT1	16.1924	27.5735		ILMN_1679405	DDX56	8.55947	11.8905							ILMN_1737413	MSH2	9.45046	14.3735
ILMN_1773760	PAICS	18.3177	6.06551												ILMN_1740180	SNX3	9.3299	24.1307		ILMN_1679339	C3orf62	8.20417	35.426		ILMN_2103547	GOLGA8B	14.7527	5.6665							ILMN_2221006	RAD21	8.74582	15.0125
ILMN_1780189	PSMC5	17.5958	6.74943												ILMN_1731194	STRAP	12.6237	20.7287		ILMN_1775762	GNAI2	16.7985	26.8021		ILMN_1669310	RHOT2	8.50992	11.8095							ILMN_1689525	PMAIP1	6.40338	17.2411
ILMN_1787879	ARL2	13.936	10.3977												ILMN_1760676	MORF4L1	17.7942	15.5306		ILMN_1802380	RERE	14.6772	28.6983		ILMN_1785266	OFD1	9.39732	10.8682							ILMN_2278561	RABL2A	5.68163	17.9192
ILMN_1760049	SERGEF	7.64628	16.5947												ILMN_1756806	MCL1	9.28099	24.0145		ILMN_1803811	TRIB1	28.4002	14.8711		ILMN_2204726	UBR5	6.35065	13.8226							ILMN_1808837	LOC644029	11.2331	12.3374
ILMN_2396648	EXOSC1	14.6754	9.55333												ILMN_2358277	RSRC2	9.36299	23.9096		ILMN_1660364	PSCD4	10.651	32.5703		ILMN_2285141	USP48	11.2472	8.92405							ILMN_2096985	ALDH6A1	8.70501	14.772
ILMN_1691506	NGRN	8.7388	15.4884												ILMN_2375002	MAP4K4	6.55128	26.6044		ILMN_1770811	PELO	14.121	29.0593		ILMN_1778111	LOC441124	12.0422	8.10661							ILMN_1718136	UQCRHL	11.1029	12.3633
ILMN_2408415	RPL9	15.1827	9.03417												ILMN_1766798	CENTB2	11.1342	22.0163		ILMN_1803988	MCL1	16.6968	26.4719		ILMN_2119486	DMTF1	6.43921	13.6857							ILMN_2202637	CRY1	6.55854	16.898
ILMN_1768127	EBNA1BP2	14.1137	10.0317												ILMN_1785852	OBFC2A	8.26977	24.8682		ILMN_1667561	IFRD1	21.3091	21.8019		ILMN_1745852	WDR33	12.6639	7.41025							ILMN_1784300	TUBA4A	10.9772	12.3935
ILMN_1778173	AK3	15.0002	9.06206												ILMN_1783120	SLMAP	7.15855	25.9767		ILMN_2392043	SPI1	28.004	15.0968		ILMN_1814812	LOC650546	11.3578	8.54327							ILMN_1771835	NUP54	6.11513	17.2387
ILMN_1774661	SNRPB	17.5268	6.41116												ILMN_2232166	CCDC90B	9.31575	23.8087		ILMN_2367418	OSCAR	11.3054	31.7912		ILMN_1802053	ZNF91	11.4197	8.41022							ILMN_2054442	ZNF146	13.1309	10.221
ILMN_1776260	LOC653505	15.5302	8.38378												ILMN_1815107	MATR3	10.5823	22.5319		ILMN_1720158	ETS2	14.9409	28.07		ILMN_1784577	ZNF12	11.3138	8.5104							ILMN_2123431	RPS6KC1	6.05781	17.2841
ILMN_1794912	ATP5H	16.535	7.37338												ILMN_2194448	STT3B	10.8387	22.1988		ILMN_1719988	HAL	16.063	26.9471		ILMN_1695962	SLC12A9	11.4772	8.30888							ILMN_2229205	CENPC1	9.58587	13.7331
ILMN_2186597	RPP21	17.1545	6.75162												ILMN_1814465	UBE2G1	9.92606	23.0466		ILMN_1807945	ANP32A	15.2645	27.677		ILMN_1719695	NFKBIZ	6.08476	13.6945							ILMN_2128741	RDH11	9.28122	13.9631
ILMN_1715607	CHMP4A	13.8183	10.0216												ILMN_1670172	WDR33	6.06401	26.9024		ILMN_1746012	MBD6	21.3548	21.5716		ILMN_2382354	SENP7	7.08999	12.608							ILMN_1796085	PPM1B	6.58684	16.5514
ILMN_1713086	RPL27A	15.386	8.43172												ILMN_2064917	AGGF1	8.40115	24.5163		ILMN_2214197	TP53INP1	20.7567	22.1528		ILMN_1693630	C16orf7	6.58906	13.1079							ILMN_1652907	CDC5L	10.2546	12.8773
ILMN_1797181	LOC93622	11.9386	11.8522												ILMN_2307740	CD46	9.65967	23.2439		ILMN_1770161	BST1	17.36	25.4844		ILMN_1673892	GK5	9.15995	10.5176							ILMN_1713178	FAM116A	13.4004	9.71878
ILMN_1775304	DNAJB1	15.8028	7.94046												ILMN_1805028	THOC7	7.35289	25.5405		ILMN_1692785	KLHL21	20.2488	22.5593		ILMN_1762972	CHD9	5.9314	13.7461							ILMN_2231242	HMGB1	5.79763	17.2565
ILMN_1809478	SSBP1	17.9287	5.80449												ILMN_1708841	GOLPH3	9.06778	23.7973		ILMN_2282641	TBXAS1	9.87615	32.8534		ILMN_1795495	ERCC5	5.95564	13.696							ILMN_1685012	EAF1	11.5631	11.4051
ILMN_2077094	C11orf2	15.3224	8.39435												ILMN_1709882	ICK	6.89056	25.952		ILMN_2196550	C13orf18	18.9926	23.7239		ILMN_1770030	C7orf43	6.05441	13.5144							ILMN_1664449	ALG5	10.9047	12.0582
ILMN_1757730	TTC27	14.1347	9.5771												ILMN_2069593	SFRS2IP	10.5607	22.2004		ILMN_1661196	CSF2RA	13.8702	28.8355		ILMN_1745034	SLC11A2	12.2331	7.32997							ILMN_1652955	LOC648622	10.4328	12.4913
ILMN_1781638	HDDC3	14.8677	8.82086												ILMN_1662318	CCDC59	9.15219	23.5671		ILMN_1711516	ATP6V1A	25.1965	17.2963		ILMN_1715968	MLL4	5.76137	13.7437							ILMN_1748915	S100A12	11.4169	11.352
ILMN_1805827	PPA1	16.3963	7.24479												ILMN_1671257	DKC1	6.96598	25.7299		ILMN_1717052	STARD10	7.68126	34.811		ILMN_1695430	DDB1	11.4487	8.0073							ILMN_1703891	TBC1D9	11.4234	11.3245
ILMN_1704315	LOC389435	17.802	5.81132												ILMN_1748904	WTAP	9.37555	23.2354		ILMN_1726245	TGFBR2	11.8956	30.541		ILMN_1794260	FBXL10	8.42929	10.9759							ILMN_1694177	PCNA	6.21776	16.5048
ILMN_1791702	SMARCA2	8.50736	15.0988												ILMN_1694603	SMARCC1	10.3958	22.2131		ILMN_2408543	PLAUR	14.3802	27.9996		ILMN_1773620	SMARCC2	9.35733	10.0077							ILMN_2179018	NDUFAB1	12.1879	10.3894
ILMN_1697585	ACTR6	7.19864	16.4038												ILMN_1792587	VPS4B	13.3202	19.2803		ILMN_1673586	SLC6A6	9.69958	32.669		ILMN_2181432	SPC24	6.28459	13.0704							ILMN_1772658	KIAA0947	7.78941	14.7356
ILMN_1663799	RPL32	16.0533	7.44411												ILMN_2096405	WDR37	11.9637	20.6332		ILMN_1697309	NCF1	19.801	22.489		ILMN_1770433	PIK3CG	9.31559	10.0201							ILMN_1733579	EVI2A	15.9717	6.53046
ILMN_1776109	ZNF622	14.7588	8.7348												ILMN_1718961	BNIP3L	6.01246	26.5465		ILMN_1741917	OSCAR	10.7709	31.4944		ILMN_2155719	NBPF10	7.74149	11.5845							ILMN_1804676	VAMP4	8.3569	14.1112
ILMN_1660426	CPSF4	17.6591	5.82956												ILMN_1682165	NT5C2	6.97201	25.5725		ILMN_1731714	CREB5	22.2826	19.9188		ILMN_2197101	DDX19A	8.47041	10.8137							ILMN_2065299	EDEM3	8.12218	14.1945
ILMN_2324998	NGDN	17.1399	6.27317												ILMN_1665945	ACBD3	10.1777	22.3168		ILMN_1652003	GNG10	15.5812	26.5758		ILMN_1754179	AP1G2	12.8291	6.3819							ILMN_1766753	RBMS1	5.70759	16.6026
ILMN_1733690	AKAP7	12.1451	11.2365												ILMN_1692199	RNF103	10.8777	21.6093		ILMN_1738675	PTPN6	7.03256	35.1232		ILMN_1813625	TRIM25	6.82982	12.3358							ILMN_2076658	MRPL1	7.41823	14.6542
ILMN_1671554	LPIN1	14.2079	9.06453												ILMN_2158242	SHOC2	13.4492	19.0331		ILMN_2106725	NCF1B	12.1819	29.8376		ILMN_1768754	PILRB	8.37297	10.6795							ILMN_2361186	PHF20L1	9.71286	12.295
ILMN_2192694	EIF3M	15.7103	7.54382												ILMN_1779279	C14ORF32	6.94942	25.5272		ILMN_1744023	MGC18216	14.136	27.8816		ILMN_1754529	SPG7	12.0089	6.96286							ILMN_2398235	PIK3R1	9.36267	12.6142
ILMN_1719224	C17orf45	10.2153	12.9839												ILMN_1778236	PTPN11	6.81336	25.6604		ILMN_1767320	MAPK1	8.33153	33.6218		ILMN_1675258	LOC441268	10.5855	8.31104							ILMN_1709891	LOC647074	7.82197	13.9789
ILMN_1801633	C20orf52	12.424	10.7349												ILMN_1742224	SLTM	15.6689	16.8028		ILMN_1794038	FAM49A	13.5987	28.3223		ILMN_1693740	LOC647834	7.47319	11.2913							ILMN_1657697	SAR1A	8.04368	13.7084
ILMN_1655622	PRKRIR	8.78304	14.3513												ILMN_1789505	ITPR1	6.09845	26.3389		ILMN_1683494	TMEM154	13.5548	28.3051		ILMN_1776788	C5orf41	10.2478	8.50322							ILMN_1807492	LOC643668	7.78575	13.9553
ILMN_1697820	HINT2	13.827	9.29501												ILMN_2090123	DHX29	13.1307	19.2736		ILMN_1763386	BID	14.3332	27.5177		ILMN_1742224	SLTM	5.6924	12.9786							ILMN_1661039	MRPL30	6.44009	15.2964
ILMN_1718069	MIS12	12.2451	10.8587												ILMN_1665557	USP15	7.10656	25.2842		ILMN_1714527	VAMP3	14.5265	27.3031		ILMN_1742618	XAF1	5.50571	13.1262							ILMN_1764396	HDAC4	10.2925	11.4177
ILMN_2208903	CD52	13.975	9.11936												ILMN_1672843	FBXO8	8.71802	23.6254		ILMN_2347068	MKNK2	17.3384	24.457		ILMN_1658373	PAN2	11.7148	6.76214							ILMN_1672755	LOC649548	7.02139	14.6523
ILMN_1765043	RPL38	10.1615	12.9142												ILMN_1725300	MLL3	6.5702	25.761		ILMN_1768773	EGLN2	9.73018	31.9061		ILMN_1797425	DDX55	7.76571	10.6628							ILMN_1655734	RPF1	7.28108	14.3916
ILMN_1690494	RPL6	17.1653	5.87877												ILMN_1711828	ANKRD10	6.18772	26.0846		ILMN_1673363	CD97	5.65743	35.9716		ILMN_1670322	FCHO2	7.70976	10.7007							ILMN_2145997	SP4	6.05966	15.6105
ILMN_1723874	MRPS6	12.1832	10.7397												ILMN_2073732	CBLL1	9.3813	22.8775		ILMN_2071937	ATP6V0E1	10.3583	31.2572		ILMN_1716056	LMF2	9.28724	9.05739							ILMN_2365595	GMPR2	8.30505	13.3037
ILMN_2071937	ATP6V0E1	9.28165	13.6238												ILMN_1803819	IQGAP1	7.10222	25.1256		ILMN_1715674	ITPK1	13.261	28.3392		ILMN_1789436	C1orf218	9.45026	8.74941							ILMN_2170353	PTPLB	12.6907	8.77504
ILMN_1782543	EEF1D	17.3781	5.52359												ILMN_2321451	HNRNPD	8.05938	24.1678		ILMN_2387680	VNN3	17.6456	23.9203		ILMN_2215862	SLFN13	6.15539	11.9561							ILMN_2169983	ATAD1	7.11092	14.3262
ILMN_1728660	PMPCB	14.7477	8.14727												ILMN_1719749	PTGES3	8.36022	23.8563		ILMN_1797604	CAP1	10.6841	30.8421		ILMN_1722218	MBOAT7	5.75162	12.3459							ILMN_2383913	WDR33	6.55373	14.8428
ILMN_2188333	CD69	16.5828	6.30908												ILMN_2387553	PSMA3	11.8476	20.3502		ILMN_1686805	CRK	10.1531	31.2988		ILMN_2320513	APBB3	9.72325	8.35526							ILMN_1679045	SBDS	9.83967	11.513
ILMN_1749447	RPS9	16.4028	6.47404												ILMN_2383693	UPF2	11.0426	21.129		ILMN_1659463	APAF1	17.4399	23.9584		ILMN_2243553	ZNF275	8.62663	9.27003							ILMN_2117171	LMO4	12.7331	8.61196
ILMN_2376204	LTB	14.4871	8.38541												ILMN_2332558	ARL5A	8.07543	23.9792		ILMN_2384241	TGFBR2	10.2983	31.0605		ILMN_1695853	CLK4	10.479	7.37471							ILMN_2148360	ADAM10	6.16413	15.0567
ILMN_1689097	NAT5	10.9696	11.8917												ILMN_1768784	PSMC2	5.99128	26.0468		ILMN_2376455	CSF2RA	12.7804	28.5775		ILMN_1720865	OSBPL7	6.161	11.5531							ILMN_1765019	SACM1L	6.33182	14.8677
ILMN_1775743	BTG1	17.2876	5.56478												ILMN_1726289	C12ORF35	5.69365	26.3304		ILMN_1691508	PLAUR	16.4986	24.8571		ILMN_1812618	ARAP3	7.01466	10.6911							ILMN_1760676	MORF4L1	10.3988	10.7837
ILMN_1679134	NSMCE4A	11.2884	11.561												ILMN_1810729	UBL3	6.38519	25.6303		ILMN_1746704	TRIM8	12.2746	29.0751		ILMN_2145997	SP4	6.2784	11.4006							ILMN_2334303	SEC24B	6.57788	14.5355
ILMN_2392546	PAICS	14.8714	7.95425												ILMN_1677133	MITD1	11.2469	20.7352		ILMN_1677768	POR	11.4221	29.8657		ILMN_1801101	ZBTB48	8.89954	8.77855							ILMN_1664994	MINPP1	6.73626	14.3569
ILMN_1777286	LOC388344	14.3182	8.43781												ILMN_2130514	FAM76B	11.1767	20.7913		ILMN_1695706	H3F3B	7.46409	33.7959		ILMN_1667825	MLKL	5.56008	12.0942							ILMN_2079285	ATP5L	10.1871	10.8844
ILMN_1804610	NFX1	12.9938	9.73826												ILMN_1812926	ANTXR2	8.76766	23.1827		ILMN_2059549	SYK	10.6379	30.569		ILMN_1802519	VPS36	7.24974	10.3768							ILMN_1804610	NFX1	12.0647	8.84296
ILMN_1673638	RPS3A	13.1307	9.5874												ILMN_1731612	UCHL5	5.82163	26.0298		ILMN_1800912	ZFP106	8.87943	32.2113		ILMN_2349831	DICER1	6.64062	10.9351							ILMN_2058347	NT5DC1	7.78239	13.0878
ILMN_1767892	DUSP12	8.24379	14.4612												ILMN_2103761	TLE4	7.37114	24.4274		ILMN_1738523	MYD88	7.87679	33.1152		ILMN_2371280	CSF3R	8.33401	9.22438							ILMN_1785765	TM9SF2	7.35671	13.4842
ILMN_1804834	C6orf130	13.4011	9.30039												ILMN_2360415	PRNP	10.4475	21.3346		ILMN_1711490	ARHGAP26	5.84629	35.1424		ILMN_1799028	TSPAN5	6.55338	11.0006							ILMN_2285375	SORD	5.55087	15.2633
ILMN_1770048	DPH5	16.897	5.76405												ILMN_2320853	UBE2D3	7.5158	24.2626		ILMN_1658383	HSPA6	15.3875	25.5796		ILMN_1727134	KLHDC5	5.81216	11.6888							ILMN_2184049	COX7B	8.25485	12.512
ILMN_1677953	OGFOD1	14.1012	8.55216												ILMN_1712027	RSBN1L	11.366	20.4061		ILMN_1736190	CYP4F3	21.1128	19.7936		ILMN_2370573	XAF1	8.0648	9.36473							ILMN_1701269	ATP5C1	9.73074	11.0333
ILMN_1685722	EIF4A2	13.2302	9.40559												ILMN_1699859	GNPAT	14.0623	17.6722		ILMN_1776649	LRRK2	13.6505	27.1088		ILMN_1689456	ZBTB20	7.46864	9.91773							ILMN_2204983	DCTN6	5.94731	14.8143
ILMN_1677043	AKR7A2	10.8787	11.741												ILMN_1674024	IKZF5	10.4245	21.3011		ILMN_2396903	KCNJ15	19.418	21.3254		ILMN_1770824	ARHGAP4	8.47836	8.78457							ILMN_2405233	FAM133B	9.40838	11.3215
ILMN_1798654	MCM6	10.5579	12.0368												ILMN_2116127	NPEPPS	10.2404	21.481		ILMN_1773388	C13orf18	15.1036	25.4552		ILMN_1781906	RBM17	9.01583	8.14603							ILMN_1687785	PPA2	7.45704	13.2316
ILMN_1659771	LOC645683	15.0757	7.51256												ILMN_1739641	MTMR3	8.01813	23.7025		ILMN_2075051	PGS1	16.9348	23.5733		ILMN_2358652	NXF1	7.74219	9.37603							ILMN_2195914	GGH	7.01414	13.6022
ILMN_1782890	SLC25A3	12.9603	9.60938												ILMN_1684321	CYB5B	8.80647	22.8864		ILMN_1792489	ARPC2	10.9241	29.5059		ILMN_1802157	THOC1	10.7128	6.38741							ILMN_1687080	LOC402251	9.54815	10.9449
ILMN_1779324	GZMA	7.01884	15.5422												ILMN_1691570	METTL5	8.08202	23.5812		ILMN_1789074	HSPA1A	13.439	26.9501		ILMN_2395204	SLTM	9.21167	7.87896							ILMN_2370336	MS4A4A	6.45551	14.0313
ILMN_1759729	NDUFA8	9.24846	13.2656												ILMN_2061452	ORC2L	11.5184	20.1338		ILMN_1664303	HTATIP2	12.8251	27.5546		ILMN_1810725	FAM129A	6.78631	10.2591							ILMN_2077733	C12orf30	6.27325	14.2105
ILMN_1745887	FBXO21	14.8807	7.59887												ILMN_1795341	SFRS1	17.3093	14.3188		ILMN_1787127	SLC43A2	18.2848	22.0371		ILMN_1718734	MLLT6	6.76204	10.1789							ILMN_1676765	LOC390354	8.69454	11.697
ILMN_1664956	SSU72	5.95951	16.4496												ILMN_2410516	PPM1A	11.9347	19.6503		ILMN_1740010	PCNX	24.4541	15.8657		ILMN_1737211	ZNF585A	6.2385	10.6871							ILMN_1803799	LOC649555	6.4993	13.8453
ILMN_1744068	ELP3	8.20498	14.1418												ILMN_2329958	ABI1	8.84106	22.7101		ILMN_1804738	MEFV	10.5469	29.7569		ILMN_1711994	TCIRG1	9.12817	7.79741							ILMN_1765132	LACTB	8.13222	12.1816
ILMN_2312897	DGUOK	12.4502	9.8958												ILMN_1751368	HNRNPD	10.8434	20.6634		ILMN_1738237	HS1BP3	13.527	26.7404		ILMN_1666082	HEATR3	8.89963	8.02571							ILMN_1758784	ATP2C1	6.0668	14.0957
ILMN_1787680	SELS	8.4953	13.7976												ILMN_2361570	SNX14	14.4103	17.0413		ILMN_2392274	CD82	8.63879	31.6045		ILMN_1745415	BBX	9.44709	7.4774							ILMN_1675609	SMN1	6.15266	13.9962
ILMN_1809433	XBP1	14.1613	7.99475												ILMN_1728779	NGLY1	9.27542	22.169		ILMN_1718071	AGTPBP1	11.6826	28.5563		ILMN_1776077	SF1	6.3898	10.5287							ILMN_2083818	EXOC8	7.64914	12.2816
ILMN_1676924	CD247	13.6508	8.44834												ILMN_1661650	SMEK2	14.6161	16.7784		ILMN_1780756	RBM23	17.0749	23.1419		ILMN_2348268	IFFO1	6.156	10.6945							ILMN_1717834	EIF1AD	5.79855	14.1176
ILMN_1706305	C14orf112	7.48381	14.5943												ILMN_2331163	CUL4A	8.4577	22.8686		ILMN_1751708	ITM2B	20.2939	19.8729		ILMN_2251978	C21orf66	6.90913	9.90399							ILMN_1666111	YTHDC1	5.83281	14.0217
ILMN_1743432	DGUOK	10.9965	11.0481												ILMN_1690844	LOC387820	7.35243	23.9456		ILMN_1678490	RILPL2	8.6545	31.5009		ILMN_2336609	SYTL2	7.15197	9.52646							ILMN_1778764	BUB3	6.70854	13.1433
ILMN_1773968	SERBP1	8.98626	13.0283												ILMN_1784410	UBP1	8.91255	22.3755		ILMN_1711904	MXD3	17.2598	22.8817		ILMN_1666512	SKIV2L	10.1969	6.33426							ILMN_1801456	CROP	6.49314	13.264
ILMN_1662334	DNAJA3	13.8125	8.1584												ILMN_1669905	DCP2	8.77351	22.5109		ILMN_1674394	C20orf3	18.0871	22.0258		ILMN_2078697	ALPK1	7.16359	9.29667							ILMN_2100357	SMPDL3A	6.62191	13.0411
ILMN_1707783	CCDC72	15.1188	6.82672												ILMN_1763347	PIK3CB	13.8917	17.2957		ILMN_1799765	RAB24	12.9001	27.1743		ILMN_2297710	PLEKHB2	10.8892	5.55125							ILMN_1807649	SPOPL	5.55111	14.0341
ILMN_1811754	NDUFB10	9.94196	11.9984												ILMN_2314007	TCF12	8.28447	22.8784		ILMN_1699570	TPD52L2	20.5959	19.4569		ILMN_1725594	FAM188A	8.5098	7.90399							ILMN_1670769	CENPQ	5.61521	13.9535
ILMN_2081988	LANCL1	10.0373	11.8902												ILMN_1655921	GTF2E1	6.2345	24.9205		ILMN_1739641	MTMR3	20.7703	19.0924		ILMN_1698463	ILF3	5.79	10.6118							ILMN_2075436	PDIA3P	10.3226	9.22751
ILMN_1763875	ABCF1	10.4612	11.4448												ILMN_1759983	DR1	12.507	18.5947		ILMN_1679133	SERPINB1	9.87114	29.9309		ILMN_1697469	SFRS6	9.43271	6.9578							ILMN_1773369	MRPL48	7.32189	12.2216
ILMN_1793829	TMCO1	14.7928	7.08574												ILMN_2213199	KIAA1712	9.81538	21.2593		ILMN_1651692	STK10	8.07695	31.6923		ILMN_1799819	MARS	6.91527	9.42596							ILMN_2091375	KRCC1	7.25036	12.1706
ILMN_1730082	RPUSD4	15.9894	5.85969												ILMN_1776347	TCP1	12.9038	18.1506		ILMN_1652631	GLIPR2	14.4775	25.2908		ILMN_2402168	EXOSC10	5.98709	10.3167							ILMN_1655702	ABHD5	12.346	7.00819
ILMN_2103841	AIP	16.0195	5.8198												ILMN_1701855	PPP1CC	10.5029	20.5395		ILMN_1683950	SNX11	17.7888	21.8414		ILMN_1728048	LOC158160	8.23257	7.94236							ILMN_2386100	BUB3	7.86062	11.4614
ILMN_1730572	HNRPDL	10.2004	11.6257												ILMN_1738642	CMPK1	8.65061	22.3826		ILMN_1685824	B4GALT5	11.7553	27.8427		ILMN_1703288	C19orf6	6.87015	9.28399							ILMN_2172202	NUDT15	5.63265	13.5042
ILMN_1771801	SIRPG	15.9711	5.85486												ILMN_1741440	SLC35A1	8.99271	22.0341		ILMN_2112524	RNF149	13.7301	25.8596		ILMN_1681837	POLR3A	7.58771	8.56608							ILMN_2318011	PSMA3	5.60264	13.4925
ILMN_1677385	C8orf40	10.5572	11.2602												ILMN_1752589	TMEM183A	8.72785	22.256		ILMN_1803277	MVP	14.9444	24.6308		ILMN_1677200	CYFIP2	5.69617	10.4082							ILMN_1659550	LOC388654	8.17343	10.9185
ILMN_1787345	FKBP11	10.3264	11.4793												ILMN_1713668	TSNAX	13.3621	17.5844		ILMN_1767360	IL10RB	8.15749	31.4128		ILMN_2368068	TCF20	7.05493	8.86176							ILMN_1655913	NUCB2	7.09926	11.9583
ILMN_1741133	NME1	9.34671	12.4284												ILMN_1682095	RCOR3	14.0026	16.8731		ILMN_2233366	ASAP1	11.5529	27.9321		ILMN_1657515	RPS6KA5	8.24921	7.5952							ILMN_2337941	COPS8	8.57692	10.4637
ILMN_1654552	MRPS31	14.0426	7.7294												ILMN_1778673	GOLGA7	10.3131	20.5355		ILMN_1771987	SLC44A2	12.6313	26.6969		ILMN_1779034	NADSYN1	6.84278	8.87125							ILMN_2358541	RBMS1	10.3667	8.64271
ILMN_1755391	ARL2BP	15.4303	6.31674												ILMN_2117987	TFDP1	6.8823	23.9565		ILMN_1682081	RNF19B	29.1136	10.0922		ILMN_1718982	BEST1	7.01724	8.65816							ILMN_1792712	LOC201725	5.6639	13.3229
ILMN_2151817	PFN1	9.9941	11.7432												ILMN_1730824	ZNF512	12.4254	18.4052		ILMN_1687960	LIMK2	11.0605	28.1082		ILMN_2186858	C14orf131	8.29626	7.37821							ILMN_1753534	RPS18	5.84907	13.1075
ILMN_1711383	STK4	15.7567	5.97288												ILMN_1772702	SFRS2B	16.5552	14.2516		ILMN_1690963	ASAP1	10.7922	28.2527		ILMN_1735058	CHST12	7.26735	8.3653							ILMN_1666615	PREPL	5.5995	13.2928
ILMN_2121437	NCL	14.1461	7.56451												ILMN_1682264	WDR68	9.29195	21.5041		ILMN_2395827	RASGRP4	13.8615	25.126		ILMN_1775823	POFUT2	6.25901	9.29277							ILMN_2173004	RAB8B	10.7732	7.81773
ILMN_1684321	CYB5B	8.8186	12.8874												ILMN_1675472	LOC644799	8.63774	22.1543		ILMN_2347949	G6PD	19.3735	19.5915		ILMN_2291619	RAB3IP	8.33364	7.19567							ILMN_1768958	RASGRP1	5.56313	12.9325
ILMN_1814526	ADD3	12.2149	9.4886												ILMN_1715113	HARS2	11.4166	19.3525		ILMN_1764826	TFE3	12.71	26.2313		ILMN_2211065	TMEM91	6.42905	9.05009							ILMN_2125010	SKAP2	8.10962	10.3639
ILMN_1731546	RPL26	13.7736	7.92725												ILMN_2115696	USP42	8.24793	22.4544		ILMN_2402930	LOC440926	17.7165	21.0682		ILMN_2157020	SNORD48	6.83498	8.60359							ILMN_2380698	DSTN	8.21308	10.2265
ILMN_1689704	TMEM5	9.10865	12.574												ILMN_2352563	CLDND1	11.0974	19.5978		ILMN_1678268	VPS8	12.2756	26.4899		ILMN_1795089	RASAL3	7.66766	7.71652							ILMN_1679450	LOC730746	6.82202	11.5555
ILMN_1704305	NIP7	15.3736	6.28807												ILMN_1705985	PIGA	8.55134	22.1071		ILMN_1731418	SP110	9.36935	29.3858		ILMN_1689119	ZC3H5	7.12875	8.22288							ILMN_1738955	C10orf104	6.88801	11.3475
ILMN_1739946	VKORC1	15.1911	6.46986												ILMN_2362122	AP3M1	8.24422	22.4002		ILMN_1733616	TFEB	7.78128	30.9716		ILMN_1800750	ZNF692	6.50715	8.79932							ILMN_2127379	ST6GALNAC3	5.7388	12.4937
ILMN_1722838	MRPL46	11.7142	9.91818												ILMN_1788689	PHIP	16.7023	13.8721		ILMN_1664750	TMBIM4	7.15456	31.5886		ILMN_2192281	CARD8	7.24707	7.98689							ILMN_1759628	ATP1B3	11.1282	7.06709
ILMN_1666471	UQCRQ	10.3159	11.312												ILMN_1675542	LOC729148	6.64022	23.9294		ILMN_2134453	FCGR3B	21.8031	16.8673		ILMN_2059505	ARPP19	9.08952	6.08074							ILMN_1805646	SS18	8.83181	9.29077
ILMN_1761804	ALDH9A1	12.2274	9.33826												ILMN_2172269	TMEM183B	8.43711	22.0962		ILMN_1707336	ARPC4	8.84425	29.7908		ILMN_1675956	LYST	8.40934	6.73291							ILMN_1741613	SERINC1	7.7462	10.3695
ILMN_1808059	BCAS4	12.8005	8.7604												ILMN_1729816	VDAC3	7.8286	22.6451		ILMN_1697559	G6PD	14.1707	24.424		ILMN_1660193	ZNF529	6.25626	8.87272							ILMN_1795715	DPYD	9.49101	8.62396
ILMN_1771734	LOC728564	12.1467	9.40306												ILMN_1753279	HNRNPA0	6.85655	23.5932		ILMN_1809344	BTBD10	12.9406	25.5182		ILMN_1759954	PTMA	5.66458	9.40224							ILMN_1684563	SPIN4	6.2864	11.7646
ILMN_1765446	EMP3	9.33584	12.174												ILMN_1798728	C19ORF2	10.5747	19.8593		ILMN_2231928	MX2	16.0595	22.3943		ILMN_1759084	INTS8	5.54181	9.4817							ILMN_1752117	TMEM55A	10.6957	7.34665
ILMN_1791328	STK39	10.4828	11.0038												ILMN_1667839	C14ORF130	7.01124	23.3847		ILMN_1789830	CFLAR	9.74798	28.649		ILMN_1697377	LOC649841	7.35581	7.61249							ILMN_2228732	CCNG2	8.68438	9.34314
ILMN_2044832	NOP56	13.8935	7.54172												ILMN_2307450	ZNF302	7.85427	22.5293		ILMN_1734543	PTPRE	19.017	19.3735		ILMN_1774901	GDPD3	8.86012	6.06169							ILMN_1762262	PKIA	6.85625	11.0596
ILMN_1813836	DARS	15.1138	6.30408												ILMN_2143148	TM2D1	10.5365	19.8205		ILMN_1779010	MAP3K3	10.8143	27.5551		ILMN_1689046	FLJ20273	6.259	8.63783							ILMN_1672661	SP110	11.3817	6.49733
ILMN_1801119	BCL2	15.4412	5.95864												ILMN_1793118	TAX1BP1	7.52285	22.8276		ILMN_1789793	NUAK2	15.7613	22.5788		ILMN_2352590	ZNF33A	8.0799	6.61598							ILMN_1724230	LOC642236	7.97857	9.85009
ILMN_1745655	PEX16	9.15923	12.1956												ILMN_1799688	CDC23	5.63797	24.6501		ILMN_2388112	CR1	14.0055	24.239		ILMN_1741572	AKAP8	7.09791	7.5901							ILMN_1755883	RPS27A	8.36181	9.41899
ILMN_1689445	POLR2H	14.9738	6.35065												ILMN_1759818	SORL1	8.05134	22.215		ILMN_1666924	PINK1	7.92847	30.273		ILMN_2301624	MACF1	6.51399	8.12407							ILMN_2150856	SERPINB2	5.89063	11.8031
ILMN_1797342	FNBP1	13.8118	7.50395												ILMN_1700915	BMI1	6.70229	23.5473		ILMN_1802458	AGTRAP	12.0413	26.1416		ILMN_1763694	RSPRY1	8.18989	6.37933							ILMN_1762808	LOC651919	5.59339	12.0995
ILMN_1726391	MRPL39	15.8027	5.50949												ILMN_1734316	YME1L1	5.6112	24.6186		ILMN_1688953	ARHGAP19	7.40301	30.7163		ILMN_2388466	TIA1	8.49067	6.07315							ILMN_1738572	USP48	9.06856	8.62044
ILMN_1776375	PIN1	7.58394	13.7154												ILMN_1717099	DSCR3	12.8839	17.2367		ILMN_1707858	H2AFZ	13.5303	24.5709		ILMN_2181125	NAPB	6.58248	7.97556							ILMN_1661485	RBM34	7.11472	10.5282
ILMN_1684289	PNPO	12.0517	9.24568												ILMN_1807448	FAM8A1	6.90542	23.1677		ILMN_1703650	TNIP1	8.47967	29.5925		ILMN_2197247	POLR3A	8.16969	6.31055							ILMN_1695475	SEMA3C	5.76704	11.7607
ILMN_1708906	C2orf29	15.1308	6.15476												ILMN_1722858	PPP2CA	10.811	19.2551		ILMN_1793743	DIRC2	9.35235	28.587		ILMN_1815148	MAN2A2	8.27216	6.079							ILMN_1696975	USP1	6.61362	10.889
ILMN_1772719	GPN1	14.1957	7.08227												ILMN_1661142	TMF1	12.5588	17.4984		ILMN_1683250	LOC440731	17.4888	20.3974		ILMN_1810176	MAP3K7	6.59555	7.71208							ILMN_1694847	TERF1	11.1602	6.25658
ILMN_2369682	HNRPA2B1	14.8489	6.42516												ILMN_1767892	DUSP12	7.82077	22.2363		ILMN_1701837	KLHL2	17.3963	20.4764		ILMN_1706521	CSNK1G2	8.28698	5.96783							ILMN_1726460	RPL14	7.88826	9.50715
ILMN_2341363	ATP5A1	14.1177	7.12405												ILMN_2324998	NGDN	7.73619	22.3159		ILMN_1779735	C7orf59	12.6289	25.2002		ILMN_1763884	Magmas	6.33393	7.86348							ILMN_1813801	LOC643668	6.47114	10.8682
ILMN_1789176	PSMB1	12.1113	9.11145												ILMN_2219556	ISCA1	14.0957	15.9233		ILMN_1721106	C14orf159	8.94672	28.8475		ILMN_1811997	ZNF364	5.94456	8.04111							ILMN_1677963	TMCC1	5.63484	11.6227
ILMN_2394250	PLEKHA1	12.6307	8.57345												ILMN_1677239	CCDC14	7.36197	22.5807		ILMN_1769665	RAB5C	12.1482	25.6269		ILMN_1688755	AAK1	5.74797	8.10937							ILMN_2319996	RPL3	8.62477	8.54584
ILMN_2232936	UQCRH	12.561	8.61178												ILMN_1655163	STK24	7.57231	22.3643		ILMN_1720531	JMJD2B	10.4732	27.2952		ILMN_1766359	GATAD2B	6.79315	6.97317							ILMN_1766085	REL	7.28175	9.82394
ILMN_1736353	PSMC1	6.05596	15.0919												ILMN_2076463	SLC15A4	8.29611	21.6016		ILMN_1676955	TYK2	13.7718	23.9337		ILMN_2143250	FAR1	5.97981	7.70377							ILMN_1750044	ZNHIT3	5.54148	11.5402
ILMN_1771903	NUP37	9.63176	11.4372												ILMN_1737462	OXR1	10.7279	19.1454		ILMN_1678605	CDC123	7.74072	29.898		ILMN_2362911	CLK2	6.34592	7.25139							ILMN_1794187	FBXL3	5.72463	11.2179
ILMN_1674385	YWHAQ	10.7805	10.2802												ILMN_1761981	FAM96A	6.06587	23.7966		ILMN_2126706	LMNB1	16.803	20.8176		ILMN_1745262	REM2	6.22145	7.31408							ILMN_1681283	HIF1A	6.79841	10.0183
ILMN_1691449	LOC646630	11.0061	10.0346												ILMN_1682799	STAMBPL1	6.42553	23.4339		ILMN_1749244	LYRM1	14.1111	23.5079		ILMN_2231242	HMGB1	5.67012	7.71504							ILMN_1797793	BLVRB	6.93781	9.8363
ILMN_2182750	DDX1	12.2977	8.71622												ILMN_1717219	MGC12966	6.50525	23.3069		ILMN_1758864	VNN2	17.1892	20.4248		ILMN_1807737	SFRS17A	7.51524	5.84298							ILMN_2290118	MEGF9	10.2089	6.54425
ILMN_1753279	HNRNPA0	13.4742	7.51401												ILMN_1681304	PAN3	15.901	13.908		ILMN_1780057	RENBP	10.9428	26.6679		ILMN_2175474	MTRF1L	6.68695	6.47001							ILMN_2086095	ID2	8.50777	8.18816
ILMN_1799103	SNRPB	13.766	7.16107												ILMN_1684929	TOPBP1	5.91939	23.8858		ILMN_1808299	IQSEC1	8.55415	29.0557		ILMN_1754130	TRIM52	6.51455	6.5916							ILMN_2342240	MGAT2	8.20154	8.48925
ILMN_1666739	RBM15	6.23546	14.6701												ILMN_2106902	CHES1	12.282	17.5089		ILMN_1691117	DNTTIP1	22.9206	14.6546		ILMN_1753805	PRKD2	6.63325	6.47109							ILMN_2165473	MID1IP1	5.78815	10.8922
ILMN_2043816	ARPC5L	8.42429	12.4386												ILMN_1798254	ACTR10	5.59303	24.1842		ILMN_1677919	GMPR2	10.3336	27.1929		ILMN_1766195	ZNF558	6.83258	6.2712							ILMN_2062271	CDK5R1	6.57532	10.0013
ILMN_2167616	NACA	11.6024	9.22809												ILMN_1695034	LOC642817	9.20012	20.5712		ILMN_1747771	LOC730744	14.3814	23.1449		ILMN_1711078	CDC2L2	6.44562	6.54946							ILMN_1691053	LOC91561	5.60718	10.8619
ILMN_1687738	LOC650276	14.2664	6.54028												ILMN_1721703	PNN	14.8034	14.9661		ILMN_2307656	AGTRAP	9.85497	27.636		ILMN_2215824	ANKRD20A1	6.49718	6.09211							ILMN_1694491	CCNG1	7.98419	8.39283
ILMN_1672006	SSB	10.3091	10.4905												ILMN_1677440	ATP6AP2	7.04732	22.7051		ILMN_1703477	ARHGEF2	14.5021	22.9701		ILMN_2103362	ARHGAP27	7.01746	5.52642							ILMN_1783304	ATP1B3	9.40635	6.97056
ILMN_1666372	ATP5H	14.9853	5.76741												ILMN_1711919	SCYL2	18.3557	11.347		ILMN_1763147	NDUFB6	12.3677	25.0118		ILMN_2362293	FBXO38	5.55681	6.64091							ILMN_1728132	LDHB	7.39085	8.92559
ILMN_1706117	LOC391656	6.54925	14.2014												ILMN_1664921	PPP6C	9.84841	19.8472		ILMN_2072598	LOC401357	20.7988	16.5419		ILMN_1720088	SFRS12	6.03682	6.02822							ILMN_1803977	GALNT1	6.3222	9.95507
ILMN_2183510	ARMET	9.09581	11.6117												ILMN_1742238	SET	9.94406	19.7411		ILMN_1756937	ST8SIA4	15.7132	21.5972		ILMN_1718297	EML4	6.49445	5.55557							ILMN_1680223	PNPLA8	7.32084	8.84299
ILMN_2396991	HCST	14.9689	5.71544												ILMN_1733931	PDCD6	10.4031	19.1839		ILMN_1686862	HLX	10.1733	27.0923		ILMN_1655177	PIK4CA	6.42168	5.56524							ILMN_1811029	TLK1	9.34261	6.64598
ILMN_1715324	HSD17B8	12.6011	8.05546												ILMN_2163306	FAM120A	9.76338	19.8118		ILMN_1768973	HIST2H2AC	11.0082	26.1021		ILMN_1768958	RASGRP1	5.6309	6.33688							ILMN_2146372	KCTD6	6.53288	9.37406
ILMN_1683498	LOC441034	13.8912	6.76494												ILMN_1803348	EHBP1	8.54881	21.0108		ILMN_1796537	FYB	9.147	27.8895		ILMN_2061185	SH2B1	5.97994	5.61799							ILMN_1748904	WTAP	6.98759	8.85128
ILMN_1721989	ATP5F1	13.5038	7.13385												ILMN_1703015	ZRANB2	11.5989	17.8921		ILMN_1657395	HMGCR	15.6063	21.4037		ILMN_1733983	LOC653316	5.67266	5.77248							ILMN_2147517	CD58	7.28859	8.4835
ILMN_2054442	ZNF146	12.9024	7.72072												ILMN_1740716	RBM26	9.47515	20.0018		ILMN_2367215	PRCP	13.9439	23.0183		ILMN_1809695	CAMK2G	5.50156	5.56666							ILMN_1660549	GPR177	5.62516	10.0717
ILMN_1815107	MATR3	10.9509	9.63164												ILMN_1693227	ZC3H7A	11.6598	17.6701		ILMN_2254635	ITGAX	20.1055	16.7778												ILMN_1652680	LOC652616	10.0209	5.5558
ILMN_1695868	PRICKLE4	13.7877	6.73162												ILMN_2160764	HBP1	6.71591	22.563		ILMN_1684440	PXN	16.0487	20.78												ILMN_1656399	TCEAL8	7.068	8.49218
ILMN_2097793	ZBTB4	11.7786	8.72736												ILMN_2148668	RCBTB2	7.31398	21.955		ILMN_1669833	SH2B2	8.57272	28.224												ILMN_1761801	LOC147804	8.44826	6.91105
ILMN_1700432	ITPKB	10.6616	9.79824												ILMN_2094905	COMMD10	6.6783	22.4947		ILMN_1778111	LOC441124	18.3688	18.3762												ILMN_2043828	UTP23	5.65607	9.5335
ILMN_1774196	URM1	9.89111	10.5517												ILMN_1727134	KLHDC5	13.4529	15.7088		ILMN_1691559	ELF2	14.392	22.345												ILMN_1772845	SNRNP35	6.27187	8.90855
ILMN_2142554	NENF	10.8826	9.53375												ILMN_2330861	SMC4	7.93805	21.2153		ILMN_1728677	CREB5	15.4968	21.2135												ILMN_2364062	THOC4	6.93628	8.00482
ILMN_1764577	MFNG	12.3617	8.05												ILMN_2312732	DPP8	13.641	15.4821		ILMN_2144426	HIST2H2AA3	9.30083	27.3925												ILMN_1651358	HBE1	5.65593	9.05664
ILMN_1725105	EEF1E1	9.49136	10.892												ILMN_1656413	ZMPSTE24	10.0954	19.0266		ILMN_1739805	NDE1	9.53461	27.1189												ILMN_1739083	SIRT1	7.17201	7.39267
ILMN_1787628	NOP56	12.9204	7.36942												ILMN_1717868	CCT8	6.26699	22.8509		ILMN_2339748	RNF13	15.2743	21.3225												ILMN_1751258	NDUFA4	5.9766	8.45399
ILMN_1746686	POLR1C	9.85042	10.4389												ILMN_1768097	RPGR	7.9659	21.1281		ILMN_1735052	ULK1	21.2142	15.3418												ILMN_1662846	GPR160	6.40992	7.79918
ILMN_1800787	RFTN1	7.50957	12.7788												ILMN_2087575	ZC3H4	7.59399	21.4971		ILMN_2243687	LAMP2	20.3038	16.2473												ILMN_1681760	LOC728518	5.58042	8.62855
ILMN_1661264	SHMT2	6.80569	13.4744												ILMN_1728305	PUM2	9.46963	19.6022		ILMN_2396287	RFX2	7.87882	28.6027												ILMN_2350574	MYADM	5.57345	8.50292
ILMN_1693287	POMP	6.98705	13.2882												ILMN_1760490	ACVR1	5.81303	23.2525		ILMN_1677843	RAB24	22.2118	14.2586												ILMN_1707312	NFIL3	5.99021	8.03731
ILMN_1793549	PTPN4	6.18357	14.09												ILMN_1778371	CCBL2	6.68994	22.3467		ILMN_1664068	ERGIC1	13.9308	22.4876												ILMN_2330112	CNIH	6.03665	7.98447
ILMN_1800008	ACAT1	8.21827	12.0518												ILMN_1709894	CLPX	10.4743	18.4922		ILMN_2363591	SDCBP	12.7986	23.5507												ILMN_1787843	HSDL2	7.12704	6.8887
ILMN_1723843	CSNK2A2	12.5488	7.70853												ILMN_1695276	MAPRE2	6.43482	22.5269		ILMN_1705144	ULK1	21.4203	14.9187												ILMN_2048636	ME2	7.94682	6.03774
ILMN_1654543	MED6	10.3108	9.88335												ILMN_1749014	ACLY	7.60436	21.3352		ILMN_1720708	CSNK1D	11.0933	25.2396												ILMN_1696187	PYGL	7.78219	6.07406
ILMN_1652207	COX4I1	9.21105	10.9825												ILMN_1676005	KPNA1	6.71075	22.208		ILMN_1652680	LOC652616	18.2818	18.0245												ILMN_1683817	UBE2Q2	8.32292	5.53026
ILMN_1796177	GIPC1	13.4608	6.73158												ILMN_1736002	COPS5	8.61072	20.3006		ILMN_1740298	SIGLEC5	15.0509	21.1925												ILMN_1694548	ANXA3	6.00416	7.45619
ILMN_1729816	VDAC3	6.18091	13.9905												ILMN_1748911	SNAP23	6.43072	22.4786		ILMN_1750961	TM6SF1	12.458	23.7826												ILMN_1769546	RIN2	6.47978	6.79794
ILMN_1737146	TRAM1	7.5145	12.6447												ILMN_1740171	DUSP11	9.9721	18.917		ILMN_1735367	HSD17B11	10.0103	26.1863												ILMN_1793146	CCDC25	5.58093	7.60922
ILMN_2079655	KLRB1	10.6132	9.53231												ILMN_2265995	NBPF3	11.153	17.7001		ILMN_2117623	PLXNC1	12.7442	23.4213												ILMN_1695640	PTPN22	6.50451	6.61147
ILMN_1799814	WDR57	8.90901	11.2333												ILMN_1798164	PHF3	9.28085	19.4939		ILMN_1712687	PAK2	8.81162	27.3531												ILMN_1687858	CALM2	5.55468	7.39036
ILMN_1748438	POLR2G	7.49491	12.6401												ILMN_2112524	RNF149	14.4421	14.3304		ILMN_1731048	TLR1	9.52211	26.5986												ILMN_2075440	PDIA3P	6.39214	6.52055
ILMN_1705464	MRPL41	10.6032	9.51836												ILMN_1729175	FBXO3	10.2381	18.4914		ILMN_1751803	LSM10	7.24301	28.8564												ILMN_2367428	FAM96A	5.5941	7.10321
ILMN_1754234	ZMYND11	7.24802	12.8679												ILMN_1741032	HERC3	14.3153	14.3717		ILMN_2058795	PGCP	13.1367	22.9234												ILMN_2246328	PTPN22	5.54795	6.82258
ILMN_1763688	C17orf49	13.8089	6.29479												ILMN_1763265	CHMP1B	9.22679	19.4286		ILMN_1762713	C19orf59	15.9068	20.1223												ILMN_2322935	MAPKAPK5	5.87237	6.35296
ILMN_1692545	LOC646849	13.92	6.14266												ILMN_1689400	CLK1	9.23564	19.4174		ILMN_1758418	TNFSF13B	9.62287	26.2566												ILMN_1667813	LOC648000	5.55494	6.27159
ILMN_1719392	FH	8.26863	11.775												ILMN_1789751	MFSD1	8.21764	20.4215		ILMN_1772686	FGD3	19.2842	16.5831												ILMN_1729563	UGDH	5.84589	5.89463
ILMN_2373515	HSP90AA1	12.6458	7.36862												ILMN_1772692	DICER1	14.4688	14.1532		ILMN_1743032	CTSS	15.938	19.9132												ILMN_1654920	HNRPH3	5.95528	5.69869
ILMN_2196347	CDKN1B	6.80271	13.1808												ILMN_1771238	CHM	8.6819	19.9257		ILMN_1812926	ANTXR2	13.7325	21.9476
ILMN_1670561	TCEAL8	7.44853	12.4925												ILMN_1736054	SUB1	6.47718	22.106		ILMN_1799106	MOSC1	15.215	20.455
ILMN_2093775	ZNF831	10.2771	9.62124												ILMN_2390338	UBE2E3	10.6935	17.8568		ILMN_1805175	TGFA	12.1611	23.4836
ILMN_1684210	NPAL3	13.2457	6.65024												ILMN_1769319	CNBP	7.53882	20.9688		ILMN_1767253	RRP12	7.38838	28.1832
ILMN_1671932	SAMM50	8.48577	11.3656												ILMN_1689123	CCNK	10.3297	18.1406		ILMN_1785615	SUMO1P1	5.55912	29.9554
ILMN_1756355	NDUFS3	11.1462	8.68524												ILMN_1776094	PPCS	6.37961	22.0639		ILMN_1657977	MSRB2	9.49621	26.007
ILMN_1804851	MRPS17	10.5801	9.23389												ILMN_1716862	PPM1B	10.3207	18.113		ILMN_1781285	DUSP1	22.1803	13.3139
ILMN_1726755	COPS4	14.02	5.763												ILMN_1764087	SYPL1	7.09346	21.3352		ILMN_1732923	SIPA1L2	17.3587	18.1206
ILMN_1801606	AMZ2	7.54196	12.1879												ILMN_2332105	WRNIP1	10.0355	18.3713		ILMN_1776188	MAP1LC3A	10.4339	25.0021
ILMN_1669550	MAD2L2	6.32889	13.4002												ILMN_1795911	KIAA0372	13.8322	14.549		ILMN_1790228	FURIN	5.79603	29.6175
ILMN_1770339	RPAIN	11.8113	7.89524												ILMN_2279635	EIF4G2	13.9926	14.3552		ILMN_1813625	TRIM25	14.2188	21.1775
ILMN_1707858	H2AFZ	6.88673	12.7918												ILMN_2174612	CNOT8	15.811	12.4835		ILMN_1717056	TXNRD1	11.1097	24.2705
ILMN_1793712	SCAMP3	11.72	7.9569												ILMN_1701111	KIAA1434	8.01141	20.2245		ILMN_1747460	TMEM184B	15.4499	19.924
ILMN_2217809	TMEM126A	11.8712	7.76371												ILMN_2129388	KIAA1128	6.8189	21.3465		ILMN_1696394	IL6R	7.28512	28.0462
ILMN_1663685	DGCR6	13.8979	5.69946												ILMN_2196097	PPP2CA	6.53874	21.5986		ILMN_1658706	ST6GALNAC2	22.6871	12.6094
ILMN_1690386	CSRP2BP	10.1821	9.41026												ILMN_1798659	CCDC28A	7.31789	20.7621		ILMN_1808811	SBNO2	21.6398	13.6513
ILMN_1721457	RANBP1	9.55025	10.0297												ILMN_1774930	CDC14A	6.95344	21.1149		ILMN_1694548	ANXA3	16.3575	18.9147
ILMN_1657722	RPS3A	13.0528	6.52033												ILMN_1682232	MIER1	10.9074	17.1289		ILMN_1692742	DENND3	23.4977	11.7637
ILMN_1782633	BOLA2	12.9	6.6158												ILMN_1726743	MRPS30	7.89149	20.0947		ILMN_2415536	SIPA1	9.62439	25.6311
ILMN_1719756	ZAP70	12.9624	6.55236												ILMN_1704557	RPS6KB1	6.30826	21.645		ILMN_2204545	ST3GAL4	9.30082	25.9106
ILMN_1799367	TXNDC14	12.9902	6.51716												ILMN_2378100	FBXL5	11.4966	16.4474		ILMN_1804530	LOC653888	5.51446	29.6594
ILMN_2365465	XBP1	12.4154	7.06923												ILMN_2361695	BAG5	12.0557	15.879		ILMN_2169152	SRGN	13.7061	21.4427
ILMN_1680703	MRPS15	8.63946	10.831												ILMN_1773247	ZNF410	12.3981	15.475		ILMN_1714108	TP53INP1	18.8863	16.2414
ILMN_1655244	LOC642755	11.9838	7.48167												ILMN_1742541	ZNF518A	8.1382	19.7304		ILMN_2415144	SP110	8.30448	26.8021
ILMN_2221564	LYAR	8.99028	10.4643												ILMN_2147517	CD58	6.76816	21.0561		ILMN_1700855	LOC642684	16.5664	18.4806
ILMN_1800197	MRPL36	8.51503	10.9279												ILMN_1673795	HSD17B4	8.71076	19.0693		ILMN_1688240	PHOSPHO1	10.9907	24.0496
ILMN_2392635	ABCF1	6.91441	12.5278												ILMN_1768050	SCOC	6.75622	21.0131		ILMN_2403446	ABHD2	7.06088	27.9682
ILMN_2374244	DYRK2	9.50754	9.93403												ILMN_2324421	TXNRD1	9.17919	18.5594		ILMN_2263718	SPAG9	12.704	22.2518
ILMN_1795937	VIL2	10.6129	8.80206												ILMN_1793474	INSIG1	10.0776	17.6069		ILMN_2220739	TMCO3	8.04916	26.9046
ILMN_1689652	RNMTL1	11.0505	8.3504												ILMN_1815719	PLCG2	6.87285	20.7841		ILMN_1660629	NBEAL2	16.4412	18.5114
ILMN_1796113	BCDIN3D	9.26717	10.1208												ILMN_2182704	BIRC2	9.31598	18.3322		ILMN_1679731	SLC15A4	11.0465	23.8895
ILMN_1789266	CCDC25	10.3827	8.99028												ILMN_1745887	FBXO21	5.69594	21.9443		ILMN_1678494	ZNF438	9.69471	25.218
ILMN_2326997	DHPS	10.3281	9.02118												ILMN_1664424	ZBED5	7.31683	20.0094		ILMN_1789233	VPS37C	15.5801	19.3024
ILMN_1690371	MRPL11	11.6742	7.66475												ILMN_1695853	CLK4	6.56543	20.7529		ILMN_2115434	RAB32	8.1955	26.5856
ILMN_2325506	BCAS4	12.802	6.52528												ILMN_2390162	PHF11	7.99252	19.2959		ILMN_1720850	BAZ2B	19.8014	14.9663
ILMN_2398432	BRMS1	6.29584	13.0293												ILMN_1721704	FNTA	10.001	17.2566		ILMN_1706217	TLR4	12.8277	21.9004
ILMN_1781516	SUPT16H	12.6186	6.69224												ILMN_1660840	FAM152A	6.66227	20.4998		ILMN_2354391	EGLN2	13.3304	21.3818
ILMN_1676946	AP3M2	8.37298	10.917												ILMN_1717745	TIAL1	12.6014	14.5469		ILMN_1763265	CHMP1B	16.7381	17.9616
ILMN_1668540	ZNHIT6	8.85571	10.4278												ILMN_1677098	YPEL2	7.62369	19.4888		ILMN_1703305	TWF2	10.2319	24.4208
ILMN_2377240	AKTIP	13.53	5.70656												ILMN_1655561	ARPC3	6.33548	20.7749		ILMN_1667476	LTBR	13.9424	20.6561
ILMN_1734826	NUP88	6.60224	12.6318												ILMN_1667086	AP3M1	6.27661	20.8313		ILMN_1781454	RAE1	6.45016	28.1469
ILMN_1759954	PTMA	12.7268	6.46625												ILMN_1807106	LDHA	6.35145	20.6888		ILMN_1780334	KCNJ2	15.8393	18.7323
ILMN_2348503	PPIE	12.6126	6.55853												ILMN_1769671	RYK	7.43717	19.5609		ILMN_1748915	S100A12	17.6413	16.8532
ILMN_1697348	WBSCR22	7.80781	11.3595												ILMN_1715635	ATP6V0E1	8.66174	18.2202		ILMN_2323633	TPD52L2	9.13303	25.3607
ILMN_1725071	CCDC12	9.09647	10.0051												ILMN_2307455	UBE2A	11.895	14.9765		ILMN_1753342	SAT1	9.34716	25.0793
ILMN_1771026	GARS	8.20942	10.8881												ILMN_1796855	TIAL1	14.1	12.7644		ILMN_1715635	ATP6V0E1	10.6792	23.7366
ILMN_1776216	MMGT1	7.70084	11.2576												ILMN_1671221	GAPVD1	8.00273	18.7917		ILMN_2059535	PPM1F	16.6509	17.7522
ILMN_2305544	DBI	9.71326	9.24116												ILMN_1683888	SRP72	6.69402	20.0546		ILMN_2260991	TSPO	7.39807	26.994
ILMN_1664833	MRPL50	10.5742	8.36514												ILMN_1749521	SLC35E3	11.5061	15.2113		ILMN_1769566	ATG3	6.04008	28.3255
ILMN_1813604	NDUFB7	9.17352	9.7638												ILMN_1799487	N4BP2L1	6.14745	20.545		ILMN_1774901	GDPD3	9.63779	24.5402
ILMN_2097546	NUDC	12.4145	6.50157												ILMN_2405305	ARNTL	6.10569	20.5687		ILMN_1804679	MYST1	14.2521	19.8945
ILMN_1795822	DIS3L	5.90514	13.0025												ILMN_2056479	TXNL2	7.97717	18.6251		ILMN_1791147	YPEL3	19.5471	14.5707
ILMN_1731783	ATP1A1	13.0435	5.83374												ILMN_1797964	ARL6IP6	11.3392	15.232		ILMN_2361807	OS9	7.48676	26.6204
ILMN_1806123	MRPL23	9.2251	9.63453												ILMN_1707156	LRRFIP2	6.68611	19.7737		ILMN_1802808	LOC654103	6.40606	27.6701
ILMN_1751143	C7orf23	13.0333	5.81979												ILMN_1751492	FAM18B	6.56158	19.8962		ILMN_1798980	CAPZB	7.68854	26.3702
ILMN_1803624	TMEM147	8.30228	10.5327												ILMN_2349600	BRD8	6.96227	19.4338		ILMN_1734317	DPF2	7.45757	26.559
ILMN_1794260	FBXL10	10.1602	8.66416												ILMN_1689665	NAE1	6.57146	19.7993		ILMN_1729161	NOTCH1	22.6652	11.334
ILMN_1651987	C6orf129	12.4989	6.30838												ILMN_1781290	RHOA	7.1154	19.2094		ILMN_2106331	H3F3A	13.537	20.399
ILMN_1726839	DCUN1D5	5.58465	13.1764												ILMN_1711627	SIAH1	15.2469	11.0285		ILMN_1692225	DOK3	9.18656	24.6962
ILMN_1743049	PWP1	10.416	8.33801												ILMN_1780036	WDR1	8.53595	17.7176		ILMN_2344373	MVP	7.40251	26.4442
ILMN_1662129	RCN2	10.6358	8.09283												ILMN_2104106	XPR1	12.6982	13.5424		ILMN_1702817	B3GNTL1	5.73506	28.0563
ILMN_2191568	TUSC4	8.71262	9.9867												ILMN_1666208	C14ORF106	9.66202	16.4804		ILMN_1709233	F5	11.1484	22.5715
ILMN_1734696	FRG1	11.3263	7.33549												ILMN_2200636	KIAA1267	7.18136	18.8821		ILMN_1677693	GPR109B	15.8801	17.8359
ILMN_1812312	NDUFS4	11.7643	6.73694												ILMN_1737988	PRNP	7.59893	18.4628		ILMN_1747506	DHX34	12.4573	21.2587
ILMN_1812392	TMSB10	6.58263	11.9063												ILMN_1696127	KIAA0240	10.4061	15.647		ILMN_1753111	NAMPT	14.5357	19.1201
ILMN_1704014	LOC730256	10.1592	8.32223												ILMN_1726359	NECAP1	7.19053	18.8535		ILMN_1721093	TAF10	6.40258	27.2068
ILMN_1725417	NELL2	11.6686	6.76528												ILMN_1795930	PTGER4	6.74188	19.2836		ILMN_1753547	STAT5A	11.9333	21.5969
ILMN_1813240	EIF1AX	5.57714	12.8456												ILMN_1679796	TOMM20	6.78271	19.2264		ILMN_1668743	LOC728069	10.7478	22.7507
ILMN_1667043	EIF4A3	10.7606	7.65134												ILMN_1753885	YTHDF1	8.21259	17.7909		ILMN_1716465	RBP7	15.997	17.4651
ILMN_1706326	MRPL33	12.5379	5.85271												ILMN_1782444	YIPF4	8.31045	17.6815		ILMN_2345898	SLA	21.1231	12.3233
ILMN_1801348	GOT2	10.5579	7.82396												ILMN_1708095	PANK2	9.94664	16.0101		ILMN_1706261	SLCO3A1	12.0049	21.4339
ILMN_2412549	GAR1	11.3404	6.99718												ILMN_1736021	PRPF4B	12.8648	13.0773		ILMN_2336595	ACSS2	13.0438	20.3522
ILMN_1742798	SFRS10	7.9923	10.3362												ILMN_1721081	SP4	7.9958	17.869		ILMN_2398432	BRMS1	9.02998	24.3559
ILMN_1784641	NDUFA3	9.96944	8.35357												ILMN_1740493	TRAF5	5.99338	19.8632		ILMN_2214910	EPHB4	11.6562	21.6886
ILMN_1675852	LOC650518	8.66433	9.62991												ILMN_1753719	GTF2A2	8.49656	17.2889		ILMN_1674609	CLTB	5.78418	27.5275
ILMN_1658259	DRG1	10.0039	8.27598												ILMN_1789283	PPP2R5C	5.8179	19.9652		ILMN_2365595	GMPR2	9.74893	23.5252
ILMN_2344455	G3BP1	9.922	8.29259												ILMN_2347805	EXOC1	15.4251	10.3544		ILMN_1724422	SELL	12.4329	20.8411
ILMN_1676393	ATP5G1	7.05835	11.1148												ILMN_2052598	ARMC10	7.13907	18.6164		ILMN_1741371	TMEM8	9.18034	24.0921
ILMN_1711729	LOC442454	7.35967	10.7896												ILMN_2380946	EIF4G2	8.48067	17.2398		ILMN_2380494	ANXA11	7.20904	26.0502
ILMN_1690561	GZMM	11.6084	6.52843												ILMN_1664826	FBXO33	6.0653	19.6529		ILMN_1736863	TMEM140	11.6158	21.5546
ILMN_2232166	CCDC90B	5.65346	12.4782												ILMN_1765409	STAM	5.73638	19.9222		ILMN_1810488	NFYC	10.5331	22.6356
ILMN_1672807	CA5B	7.82219	10.2915												ILMN_1810838	MTDH	6.35543	19.3007		ILMN_2327090	MAEA	16.2776	16.8345
ILMN_1803953	LOC388789	10.3591	7.73761												ILMN_1741782	SS18	9.41918	16.1554		ILMN_1739428	IFIT2	15.4937	17.5803
ILMN_2131880	DPY30	10.3277	7.73577												ILMN_1704619	VPS29	8.41511	17.0321		ILMN_1728392	LOC255809	11.0352	22.0176
ILMN_1776327	LOC727820	6.3516	11.6955												ILMN_2217809	TMEM126A	6.85691	18.5876		ILMN_1659047	HIST2H2AA3	10.3517	22.6338
ILMN_2045994	SEPW1	8.30909	9.70763												ILMN_1756999	RBL2	11.2626	14.1776		ILMN_1695962	SLC12A9	18.7607	14.1112
ILMN_1766851	TMEM126B	11.7693	6.24065												ILMN_1671554	LPIN1	8.33968	17.0711		ILMN_1693233	KIAA0513	13.2582	19.5142
ILMN_2052790	NONO	11.9375	6.06043												ILMN_1799744	GALC	5.75169	19.6131		ILMN_2290118	MEGF9	18.0233	14.6614
ILMN_2115633	CD320	10.2757	7.67959												ILMN_1782579	IMMT	8.39146	16.9573		ILMN_1724250	GRN	8.90291	23.7516
ILMN_1788538	NCALD	6.58599	11.3241												ILMN_1757384	RAN	6.80344	18.5342		ILMN_2380605	MTMR3	6.42387	26.2081
ILMN_1704750	LOC647000	9.53746	8.3349												ILMN_1683065	C2ORF64	10.2447	14.9859		ILMN_1664525	P2RY13	13.6564	18.9274
ILMN_1740819	STARD7	10.6665	7.13978												ILMN_1734229	SPPL2A	10.8641	14.3485		ILMN_1736048	ELL	15.9242	16.6588
ILMN_2402674	DPM3	8.12735	9.65767												ILMN_2229922	C12ORF35	5.74528	19.4612		ILMN_1689734	IL1RN	14.3349	18.1805
ILMN_1738816	FOXO1	9.9339	7.8019												ILMN_2136177	CNOT6	6.82049	18.3728		ILMN_1797005	PGLS	9.77009	22.7215
ILMN_2056975	HPRT1	11.7866	5.86662												ILMN_2373266	SFRS12	8.25589	16.7984		ILMN_1669033	NCOA1	18.1789	14.2797
ILMN_1653709	TIMM9	11.3354	6.31683												ILMN_1674941	TMEM16F	6.92631	18.1048		ILMN_1791545	KRT23	9.45067	23.0076
ILMN_1685774	LOC647340	9.44177	8.20136												ILMN_1728471	ARFGEF1	7.16785	17.8619		ILMN_1768394	ARPC5	11.73	20.6458
ILMN_1771966	BCCIP	8.1723	9.46533												ILMN_2327276	STAU1	11.888	13.1348		ILMN_1664094	P2RY13	20.9701	11.3882
ILMN_1739274	PDHB	11.0247	6.61158												ILMN_1730611	RTN4	8.27442	16.7449		ILMN_2372413	BID	9.68178	22.4455
ILMN_1689327	LOC730534	11.0269	6.60021												ILMN_2094166	CHMP5	10.3697	14.6236		ILMN_2125747	LOC606724	9.37634	22.7464
ILMN_1793732	FARS2	5.96805	11.624												ILMN_1724544	PPP4R1	6.13654	18.8494		ILMN_2320964	ADAR	8.45228	23.6055
ILMN_1694084	PSCD1	11.2621	6.2856												ILMN_1800447	PHKB	12.6381	12.3027		ILMN_1733443	SULT1B1	9.6971	22.3114
ILMN_1687921	JMJD8	10.9302	6.61359												ILMN_2415144	SP110	6.76374	18.1432		ILMN_2353642	ATP6V0B	13.6523	18.3261
ILMN_1798706	EBI2	10.3512	7.18934												ILMN_2108938	FNBP4	16.4399	8.4047		ILMN_1683609	UBE1	10.0719	21.8564
ILMN_2311537	HMGA1	10.9072	6.6135												ILMN_1778238	UTP6	10.4479	14.3914		ILMN_1750497	GPR109A	12.5073	19.398
ILMN_1679093	ZNF581	11.5455	5.9698												ILMN_1765204	ST13	5.83711	18.9979		ILMN_2066858	TNFSF13B	9.34039	22.559
ILMN_1729033	RPL9	11.0824	6.41942												ILMN_1786189	MKI67IP	8.66602	16.1578		ILMN_2369924	NDUFB6	9.44557	22.4245
ILMN_1718766	MT1F	11.8673	5.57989												ILMN_1677824	RAB4A	9.94444	14.8771		ILMN_1755649	SLC16A5	14.0185	17.8472
ILMN_1709043	C9orf46	10.124	7.30163												ILMN_1799128	SLC30A9	7.24677	17.5673		ILMN_1800540	CD55	7.44868	24.4061
ILMN_1814230	MTCP1	9.41119	8.01436												ILMN_2352036	RTN4	9.03022	15.7783		ILMN_2367671	LIMK2	7.8494	23.9362
ILMN_1744713	PARK7	11.2909	6.12791												ILMN_1773200	CP110	8.89462	15.8652		ILMN_1709204	CLEC4A	6.14022	25.5982
ILMN_1768784	PSMC2	10.3634	7.04838												ILMN_2402416	DNAJB6	11.4281	13.2904		ILMN_1727689	TNFAIP2	9.75938	21.939
ILMN_1764549	UBE3A	9.9403	7.44271												ILMN_1773741	GOLGA5	10.4443	14.2729		ILMN_1654735	SLCO3A1	13.6263	18.047
ILMN_2047599	TMEM50B	10.1284	7.14753												ILMN_1670817	GRPEL1	7.00292	17.6696		ILMN_2342033	F11R	16.403	15.2662
ILMN_1706238	CSE1L	8.16428	9.10353												ILMN_1766435	WBP11	13.3779	11.2741		ILMN_1661343	TNFSF14	7.84952	23.7753
ILMN_1787949	RPS15A	10.5466	6.6876												ILMN_1749634	PLRG1	13.0314	11.6141		ILMN_1731736	RIN3	10.4135	21.1682
ILMN_1768396	AURKAIP1	9.52568	7.70793												ILMN_1771019	MTMR4	7.82145	16.7107		ILMN_2053103	SLC40A1	16.4334	15.1076
ILMN_2145518	TMEM126B	11.426	5.80479												ILMN_2181540	YY1	6.30703	18.1571		ILMN_1693552	CD300A	6.66451	24.8445
ILMN_2334042	THYN1	6.68711	10.5293												ILMN_2223130	SMARCA5	7.78238	16.653		ILMN_1667199	SQRDL	7.45702	23.9739
ILMN_1730940	KLHDC3	10.9833	6.21163												ILMN_1699703	ARCN1	8.53768	15.8931		ILMN_1809583	CREBBP	16.6466	14.7785
ILMN_1658494	C13orf15	7.04449	10.1435												ILMN_1781097	UBXD2	10.4013	14.0014		ILMN_1807455	DHRS7	9.86294	21.5419
ILMN_1751258	NDUFA4	7.43571	9.73579												ILMN_1657949	RHEB	8.81938	15.5807		ILMN_1712577	FAM174A	11.3975	20.0067
ILMN_1671291	EIF3I	10.4909	6.67696												ILMN_1770127	DNAJA2	7.86115	16.4889		ILMN_1693650	FES	11.2475	20.095
ILMN_1782417	LOC651064	9.83307	7.32218												ILMN_1767848	PCMTD2	9.94951	14.3783		ILMN_1681679	TSPO	8.49205	22.8285
ILMN_2366388	PRDX1	8.45144	8.70096												ILMN_1750079	PURB	12.0116	12.2909		ILMN_1728698	GDE1	7.76025	23.5023
ILMN_2227195	CCDC65	9.55623	7.54203												ILMN_2154603	CCDC16	7.93204	16.3697		ILMN_1803984	MAK	11.0293	20.1405
ILMN_1809347	LOC729466	7.82324	9.2701												ILMN_1762615	KIAA0157	9.86531	14.4203		ILMN_1749218	TOPORS	6.02244	25.1289
ILMN_2399264	2012-09-06	8.31161	8.78034												ILMN_1745573	TTC13	12.1098	12.1698		ILMN_2081682	SMAP2	10.7284	20.4211
ILMN_1700915	BMI1	11.2772	5.79748												ILMN_2107184	SNRK	5.94138	18.301		ILMN_1735788	TRIOBP	12.1956	18.9086
ILMN_2323774	RPAIN	10.4723	6.57291												ILMN_1708604	C7ORF28A	10.1774	14.0567		ILMN_1715809	OGFRL1	16.3045	14.7899
ILMN_2079004	MDH2	6.15901	10.8401												ILMN_2208158	GTF2IP1	6.00989	18.1954		ILMN_1728639	FCGR3B	12.6246	18.3662
ILMN_1797828	DDRGK1	9.09176	7.90006												ILMN_1738736	SNX4	7.13867	17.0308		ILMN_2220518	HBXIP	8.89263	22.0837
ILMN_1746720	TTC39C	9.47072	7.51771												ILMN_1763091	C14ORF43	11.3103	12.8416		ILMN_2160764	HBP1	11.3106	19.6419
ILMN_2343775	RPL38	7.78937	9.19711												ILMN_1779258	LOC644774	11.3752	12.7514		ILMN_1738632	PRKAR1A	12.2369	18.6783
ILMN_1681340	C1orf41	10.9827	5.96903												ILMN_1657682	GFM1	6.54735	17.5606		ILMN_1801043	GSN	8.57208	22.292
ILMN_1679476	GART	9.32595	7.60306												ILMN_2362902	RASSF5	11.7883	12.258		ILMN_1721636	TSC22D4	9.89135	20.9599
ILMN_1815479	NOP10	6.07604	10.8321												ILMN_1777565	TAP2	6.05913	17.9609		ILMN_1696828	RGS14	11.768	18.9725
ILMN_1694177	PCNA	10.4122	6.4726												ILMN_2362245	HNRPH2	16.2165	7.78576		ILMN_1809695	CAMK2G	19.7839	10.9343
ILMN_2333319	PTBP1	7.29777	9.56536												ILMN_1670420	METAP2	10.3735	13.6286		ILMN_1711909	EDEM2	13.2994	17.4127
ILMN_1769634	STRA13	10.3738	6.48237												ILMN_1781906	RBM17	6.17277	17.8067		ILMN_1721116	USP10	23.0955	7.61284
ILMN_1670420	METAP2	9.24913	7.56337												ILMN_1698406	ORMDL1	6.31117	17.6147		ILMN_1714197	ACSS2	11.5833	19.0688
ILMN_1768176	CXorf26	10.0398	6.76735												ILMN_1764861	ISOC1	7.49092	16.3763		ILMN_1765880	C16orf57	13.0521	17.5868
ILMN_1659285	PSMG1	5.94699	10.8341												ILMN_1736888	SAR1B	6.35275	17.4858		ILMN_1769091	PRCP	11.6366	18.9831
ILMN_1673962	NUP205	9.31954	7.44885												ILMN_1748546	3334694400	5.54665	18.2532		ILMN_1686906	TP53INP2	13.114	17.4555
ILMN_2211780	SLC25A4	9.06571	7.65293												ILMN_1685009	ITGAM	5.88582	17.8677		ILMN_1695414	ASF1B	13.8547	16.6368
ILMN_1669206	CNOT1	9.96483	6.75217												ILMN_1797372	C3ORF58	9.71729	14.0047		ILMN_1701875	ZYX	12.5242	17.9356
ILMN_1660063	POLE4	9.26562	7.40923												ILMN_2299072	CROP	6.78285	16.9285		ILMN_1753805	PRKD2	6.34784	24.0378
ILMN_2154603	CCDC16	8.17195	8.48483												ILMN_1779252	TRIM22	9.17439	14.5232		ILMN_1852022	KIAA1881	11.2291	19.0661
ILMN_1799516	DNAJC9	10.3359	6.31933												ILMN_1777096	TDG	9.34586	14.3492		ILMN_1708991	CCNY	7.93099	22.3518
ILMN_2122953	CISD1	6.71002	9.93754												ILMN_1771411	ALG6	10.5875	13.1018		ILMN_1765146	IFNAR2	7.78488	22.484
ILMN_1663538	CLYBL	7.00854	9.60042												ILMN_1703006	MTCH1	10.896	12.7822		ILMN_2339779	ATP6V1E1	10.9572	19.2983
ILMN_2209748	DERL1	10.8255	5.76537												ILMN_2127328	PURA	6.27411	17.3885		ILMN_1798712	USP4	11.7773	18.4738
ILMN_1763080	QARS	8.05311	8.51701												ILMN_1715069	TANK	10.1886	13.4665		ILMN_1761912	MGAT1	8.44992	21.7634
ILMN_1692651	PHB	7.23946	9.31739												ILMN_1725244	HAT1	6.69581	16.9267		ILMN_2383611	PTPRE	14.2239	15.9838
ILMN_1739497	GTF2H5	6.02521	10.5284												ILMN_1736510	FOXN2	8.37712	15.2015		ILMN_2038778	GAPDH	10.0664	20.1158
ILMN_2043615	C17orf90	9.36244	7.14567												ILMN_1700923	ATG4C	5.95947	17.6111		ILMN_2173835	FTHL3	6.18861	23.9544
ILMN_2380588	C6orf108	9.52812	6.96061												ILMN_2049727	C20ORF111	7.38561	16.1828		ILMN_1815148	MAN2A2	13.5843	16.5531
ILMN_1784286	NDUFA1	6.07367	10.3681												ILMN_1802157	THOC1	7.19272	16.3081		ILMN_1792679	ITGA5	17.4249	12.6977
ILMN_1659158	SAMD3	7.56785	8.83625												ILMN_1714444	KLF12	6.37863	17.1197		ILMN_2119945	NDUFB3	14.8856	15.1488
ILMN_1674236	HSPB1	7.8291	8.51501												ILMN_1716563	PRKCB1	9.27639	14.186		ILMN_1767809	DNAJC25-GNG10	14.2628	15.7653
ILMN_1770623	FAM58A	9.15752	7.1783												ILMN_2397750	IVNS1ABP	7.68484	15.7683		ILMN_1666444	RBMS1	9.24053	20.7147
ILMN_1685095	CNO	9.85829	6.46233												ILMN_1723020	MAP3K1	6.7741	16.6657		ILMN_2082314	TOM1	9.41461	20.5401
ILMN_1779014	TSPYL1	9.05255	7.16632												ILMN_1751378	RARS	12.4861	10.9245		ILMN_1676891	CDC2L6	20.7888	9.10198
ILMN_1711862	RNF7	6.2925	9.91805												ILMN_1690122	CRKL	13.0943	10.2673		ILMN_1795893	TMEM167B	7.01719	22.8463
ILMN_2087528	CPSF3	6.63611	9.5151												ILMN_1800543	SCFD1	7.78007	15.5721		ILMN_1744113	TNFAIP8L2	7.21949	22.618
ILMN_1720819	LOC653566	9.54429	6.60017												ILMN_2334760	ARMCX3	10.5428	12.7555		ILMN_1776582	PDK3	7.10728	22.6784
ILMN_1815039	C6orf153	8.33232	7.81065												ILMN_1765060	FBXO34	5.72261	17.5743		ILMN_1669433	KIAA0913	7.59388	22.1913
ILMN_1797530	CHCHD5	5.52799	10.5742												ILMN_1808634	TMEM77	6.7019	16.5905		ILMN_1742887	LOC645058	7.77385	22.0006
ILMN_1721138	GRPEL2	9.67366	6.38924												ILMN_2411076	MATR3	9.60679	13.6643		ILMN_1696584	ORM1	9.42207	20.3053
ILMN_1697024	LOC730432	5.93822	10.0769												ILMN_1742611	C1ORF52	5.62656	17.6085		ILMN_1784540	KBTBD2	6.06252	23.6449
ILMN_1784753	PAIP2	6.88909	9.11137												ILMN_1801928	YWHAZ	10.7279	12.434		ILMN_1716596	NSMAF	12.5195	17.1527
ILMN_2383305	GPATCH4	10.3418	5.57865												ILMN_1788160	KIF5B	8.28485	14.8396		ILMN_1781198	PPP1R3D	12.966	16.6685
ILMN_2258816	SAMD3	9.17895	6.71788												ILMN_1713322	C7ORF28B	6.04566	17.0599		ILMN_1710427	VPS37B	8.28486	21.2913
ILMN_2414014	RBM10	6.85143	9.04296												ILMN_1754145	CAPRIN1	12.3754	10.7143		ILMN_1803819	IQGAP1	7.17482	22.3398
ILMN_2093343	PLAC8	8.6355	7.23025												ILMN_1718297	EML4	8.78615	14.303		ILMN_2165473	MID1IP1	19.3028	10.1981
ILMN_1784737	S1PR4	8.52589	7.32333												ILMN_1796458	GABARAPL2	5.91668	17.141		ILMN_1665384	SH3BP5L	14.5547	14.8745
ILMN_1725642	SUMO3	7.39209	8.44318												ILMN_1703926	PTGER2	6.84564	16.1989		ILMN_1737561	LOC88523	7.82434	21.5996
ILMN_1774083	TRIAP1	9.6304	6.14452												ILMN_1670472	UBXD8	6.10163	16.9275		ILMN_1800638	CUGBP2	12.451	16.9535
ILMN_1651429	SELM	9.29695	6.45816												ILMN_1728660	PMPCB	6.74205	16.216		ILMN_1722981	TLR5	9.83484	19.5572
ILMN_1801941	C1orf50	7.79195	7.92194												ILMN_2367428	FAM96A	7.35299	15.6007		ILMN_1703949	KPNB1	16.3459	13.0317
ILMN_1722905	MRPS11	7.70656	7.96346												ILMN_1809566	ZSCAN16	5.86635	17.0782		ILMN_1692962	CTDSP2	13.0349	16.326
ILMN_1734486	C1orf19	9.16263	6.45658												ILMN_2391141	UBE3A	5.66786	17.2457		ILMN_1662932	LCP1	10.6405	18.7109
ILMN_1701749	UQCRFS1	8.95734	6.6497												ILMN_1778242	CALM1	10.5513	12.3152		ILMN_1663631	BANP	14.3757	14.9547
ILMN_2138435	MRPS27	6.25262	9.34978												ILMN_1664833	MRPL50	6.3715	16.4919		ILMN_1662973	CD82	6.80676	22.5099
ILMN_2041327	MRPL37	6.31144	9.2716												ILMN_1696407	SFRS2	11.1329	11.6348		ILMN_1659936	PPP1R15A	17.2116	12.0032
ILMN_1760741	NDUFA9	5.99676	9.57803												ILMN_2222992	ETF1	7.52647	15.1882		ILMN_1665909	LASP1	13.5884	15.6035
ILMN_1799604	OCIAD1	9.18362	6.38327												ILMN_1689747	NOL8	5.99102	16.6899		ILMN_2107184	SNRK	17.4442	11.6703
ILMN_2079803	LSM14A	9.74638	5.75105												ILMN_1770548	CLASP2	9.94259	12.7281		ILMN_1715173	RPS6KA1	13.2746	15.788
ILMN_2190084	VAMP8	6.67456	8.75104												ILMN_1717877	IVNS1ABP	6.32572	16.2756		ILMN_2384591	HN1	11.7831	17.2604
ILMN_2306565	MTX2	9.6016	5.81539												ILMN_2403946	FEZ2	7.22048	15.3647		ILMN_1669674	CNPY3	12.8997	16.1075
ILMN_1713380	EIF2B2	5.59086	9.77984												ILMN_2096191	AASDHPPT	5.7808	16.7462		ILMN_1738103	COPE	5.79124	23.1847
ILMN_1738369	TUFM	6.80227	8.56694												ILMN_1764549	UBE3A	6.73932	15.7834		ILMN_1804743	USP32	11.4481	17.47
ILMN_1796244	CD2BP2	6.80332	8.54254												ILMN_2108339	THUMPD1	12.4267	10.0183		ILMN_1798485	ATP6V1E1	12.6963	16.2165
ILMN_1742166	GRWD1	9.30244	6.03484												ILMN_2371825	AGL	7.50819	14.923		ILMN_2139100	SHISA5	6.06272	22.8319
ILMN_1725241	GSTK1	6.47013	8.86654												ILMN_1712312	RAB11A	8.89224	13.5104		ILMN_1773390	LOC641996	21.1203	7.7429
ILMN_1664921	PPP6C	6.22532	9.10493												ILMN_2294274	S100PBP	7.53384	14.8625		ILMN_1750429	MKNK1	11.6367	17.2183
ILMN_1678087	MAP3K4	8.20381	7.10309												ILMN_1689518	PECAM1	9.9826	12.3918		ILMN_1750278	FTHL12	6.26612	22.5264
ILMN_1657682	GFM1	5.9581	9.29463												ILMN_1664466	KLHL9	5.54269	16.76		ILMN_1796976	NLRC4	7.32231	21.3888
ILMN_1673138	ZBTB33	9.18205	6.00954												ILMN_1713603	PRKCB1	12.2668	10.0061		ILMN_1786847	TGM3	10.8214	17.8211
ILMN_1764380	GLTP	6.26444	8.91043												ILMN_1752520	SLFN11	7.56647	14.6761		ILMN_1674038	CTSD	10.1802	18.3542
ILMN_2191681	CHCHD2	7.02453	8.11282												ILMN_1750075	DMTF1	8.87332	13.3247		ILMN_1672547	MYO9B	8.37445	20.0937
ILMN_1682799	STAMBPL1	6.44594	8.68688												ILMN_1714820	ITGB1	9.12608	13.061		ILMN_2186061	PFKFB3	14.6896	13.7089
ILMN_1767139	NDUFA13	8.09596	7.03157												ILMN_1659285	PSMG1	5.56587	16.5868		ILMN_1737343	FNIP1	12.6603	15.7382
ILMN_1733110	RASSF7	6.16853	8.95477												ILMN_1686985	MTM1	6.60376	15.5444		ILMN_2345142	SULF2	12.3139	16.0659
ILMN_1770936	COQ5	8.82526	6.28436												ILMN_1768117	RBM25	9.75639	12.3481		ILMN_1743646	VASP	7.97176	20.3197
ILMN_1721704	FNTA	9.07718	6.01364												ILMN_1670875	PPM1D	6.9273	15.0719		ILMN_1746525	FTHL2	6.76863	21.517
ILMN_2222234	PRDX4	5.68856	9.39575												ILMN_1665423	ZFP91	7.12781	14.8617		ILMN_1690625	SLC9A8	7.44976	20.8298
ILMN_1778673	GOLGA7	7.66061	7.41519												ILMN_2148847	C6ORF166	6.65982	15.318		ILMN_1662843	CD53	9.06631	19.1939
ILMN_1806778	UBE2E1	7.4692	7.54974												ILMN_1798874	TMEM85	5.97288	15.9994		ILMN_1667460	SULF2	11.5212	16.701
ILMN_1734190	TCEAL3	7.53498	7.41364												ILMN_1814113	ZFR	9.0968	12.8351		ILMN_1751615	COQ10B	14.4778	13.7192
ILMN_1684628	ZFP90	9.20953	5.67593												ILMN_1669633	ACP1	8.65919	13.2701		ILMN_1798804	SRPK1	12.3039	15.8459
ILMN_2189424	MRPL20	6.70514	8.16393												ILMN_2344956	ACP1	5.52578	16.3944		ILMN_1736700	ALDOA	12.0476	16.0711
ILMN_1656920	CRIP1	6.55236	8.2982												ILMN_2189993	MRPS35	8.30232	13.533		ILMN_1687592	WWC3	16.3692	11.7374
ILMN_1783333	C16orf61	7.73239	7.09816												ILMN_1698209	AGPS	6.66154	15.1611		ILMN_1782444	YIPF4	11.9936	16.0735
ILMN_1760683	SFRS9	9.21292	5.5905												ILMN_1739798	C7ORF30	6.01651	15.7979		ILMN_1656042	KIAA0319L	11.4645	16.4343
ILMN_1790461	C6orf125	7.8346	6.93827												ILMN_2151541	DNAJC10	6.21662	15.5795		ILMN_1775501	IL1B	15.7297	12.1659
ILMN_2061405	NUP54	7.55922	7.1878												ILMN_1728907	SCAMP1	7.90791	13.7759		ILMN_2119937	NDUFB3	11.8857	15.9888
ILMN_1710697	BUD31	5.8105	8.92479												ILMN_1791656	C10ORF137	7.02218	14.6494		ILMN_1691760	FAM45A	7.44334	20.3923
ILMN_1719749	PTGES3	6.87505	7.8567												ILMN_1761490	ZNF75	5.90919	15.7273		ILMN_1767992	SLC12A6	5.97108	21.8255
ILMN_1763568	ZDHHC16	8.50588	6.22563												ILMN_2182750	DDX1	7.39668	14.222		ILMN_1652777	CDC42EP2	9.70262	18.0178
ILMN_2307883	ATP5J2	6.69782	8.03327												ILMN_1741976	SMARCAD1	6.46406	15.1375		ILMN_1785732	TNFAIP6	9.80452	17.8874
ILMN_1694780	GCHFR	6.86501	7.82014												ILMN_1698605	TMEM43	6.03119	15.5282		ILMN_1698605	TMEM43	11.312	16.3637
ILMN_1724658	BNIP3	8.45489	6.22827												ILMN_1781373	IFIH1	7.26189	14.2736		ILMN_1750805	ARHGAP30	10.0618	17.5927
ILMN_2198878	INPP4B	8.63925	6.03764												ILMN_1811972	MYCBP2	5.79767	15.7304		ILMN_1701402	IKBIP	10.1499	17.4908
ILMN_1760245	TMEM42	7.27031	7.36665												ILMN_2082810	BRD7	6.3723	15.1242		ILMN_1764850	HPCAL1	15.001	12.6334
ILMN_1815043	MRPS2	5.92195	8.68925												ILMN_1791097	RSBN1	7.49237	13.9843		ILMN_1659415	MAP2K1IP1	13.6091	13.979
ILMN_1787248	SIVA	6.32532	8.2741												ILMN_1738656	GLOD4	8.63643	12.8006		ILMN_1715669	TP53I11	5.93124	21.6468
ILMN_2170353	PTPLB	5.57775	9.01354												ILMN_2338921	C4ORF41	8.44603	12.9333		ILMN_1685415	HBP1	13.8951	13.637
ILMN_1696046	SIVA	7.33266	7.23538												ILMN_2147306	PNRC2	8.59057	12.6901		ILMN_1791253	FBXL13	11.0496	16.4595
ILMN_1773018	CUEDC2	8.0636	6.48515												ILMN_1755749	PGK1	11.1151	10.108		ILMN_2083469	IRS2	15.6944	11.7816
ILMN_1791093	PPHLN1	5.98186	8.56555												ILMN_1671621	PCMT1	8.90701	12.314		ILMN_2253732	ST8SIA4	7.01034	20.4136
ILMN_1657547	CCDC34	5.55636	8.93993												ILMN_2093500	ZBED5	10.931	10.2798		ILMN_1732985	PHF20L1	13.6747	13.6854
ILMN_2070355	SDHAF1	7.5347	6.93852												ILMN_1707062	REV1	6.58203	14.6127		ILMN_1714393	RAB24	8.738	18.6213
ILMN_2310621	ATP5J2	6.03468	8.42211												ILMN_1710758	RNF20	6.30825	14.8467		ILMN_1692261	EPHB1	10.543	16.801
ILMN_1663512	COX5B	5.97811	8.47721												ILMN_1807649	SPOPL	7.02574	14.1013		ILMN_1740015	CD14	6.97059	20.2821
ILMN_1769810	ARL6IP5	8.83067	5.61314												ILMN_1670895	ZNF207	5.6905	15.4339		ILMN_1724236	FUT7	8.54536	18.6786
ILMN_2096654	COMMD4	6.34984	8.08787												ILMN_1685679	RNF146	6.4571	14.5689		ILMN_1793894	ANAPC13	8.80508	18.3833
ILMN_2300970	ETFB	6.04099	8.3672												ILMN_1691535	CUL4B	10.5352	10.4405		ILMN_1684402	STXBP5	7.93617	19.2435
ILMN_1658531	LOC653702	6.29228	8.0778												ILMN_1796407	SS18L2	5.96461	14.9906		ILMN_1788017	HSH2D	14.4114	12.725
ILMN_1703441	ZNF593	7.71553	6.55582												ILMN_1782538	VIM	6.51448	14.3454		ILMN_1652394	RAB2A	5.96825	21.159
ILMN_1761242	COMMD1	6.02891	8.22345												ILMN_1767837	GOLT1B	9.00088	11.8353		ILMN_1659895	MSN	7.39541	19.721
ILMN_1814650	TRAPPC4	6.94691	7.29002												ILMN_1758105	ZNF791	5.6394	15.178		ILMN_1714401	SNX27	16.9506	10.1292
ILMN_1748926	TMEM209	8.59634	5.59165												ILMN_1684385	COPB2	13.1715	7.62572		ILMN_1657455	CEACAM4	6.39231	20.6693
ILMN_2097790	C1orf86	7.43815	6.74797												ILMN_1739586	FEZ2	7.51492	13.2496		ILMN_1657624	NSFL1C	5.77148	21.2685
ILMN_2210129	PRIM1	7.64148	6.54137												ILMN_1798030	XPR1	7.74713	12.9486		ILMN_2386008	MPZL1	6.00293	21.0368
ILMN_1797813	SUZ12	6.60113	7.55962												ILMN_1733666	PLDN	6.58939	14.0862		ILMN_1803302	CRK	7.3027	19.7314
ILMN_1653026	PLAC8	8.41807	5.7414												ILMN_1771627	ZMIZ1	6.6026	14.0496		ILMN_1762284	ASPRV1	9.41713	17.5665
ILMN_1800573	RPS21	6.66358	7.49291												ILMN_1768176	CXORF26	7.65958	12.9147		ILMN_2207393	CNOT3	11.6783	15.2456
ILMN_1666409	PSMB6	6.2918	7.86216												ILMN_1809344	BTBD10	10.3233	10.2075		ILMN_2044293	KBTBD7	5.80738	21.0194
ILMN_1699362	IK	8.10854	5.99494												ILMN_1759359	BTF3L4	7.54944	12.9666		ILMN_1752927	KIAA1600	8.43132	18.3607
ILMN_2309848	FXYD5	6.42542	7.67368												ILMN_2380698	DSTN	5.66735	14.7825		ILMN_1742601	CR1	10.6236	16.08
ILMN_2215545	C3orf26	6.13788	7.94109												ILMN_1761334	ARID4B	6.1052	14.3318		ILMN_2147517	CD58	11.9206	14.7747
ILMN_1694530	DDA1	8.45828	5.60986												ILMN_1809889	CCDC117	7.52039	12.9151		ILMN_1814296	TRPM6	9.19977	17.4844
ILMN_1790136	C20orf20	8.33034	5.72195												ILMN_1664577	DLD	6.70072	13.726		ILMN_1772036	STEAP4	7.92309	18.7415
ILMN_1758674	TMEM93	7.63629	6.4155												ILMN_1807243	PRPF18	5.78165	14.564		ILMN_1803483	KIAA2013	7.84669	18.7916
ILMN_1693352	MRPL20	8.30332	5.73453												ILMN_1701753	LOC644063	9.44103	10.8976		ILMN_1656361	LOC201175	7.60711	19.0296
ILMN_2157435	DYNLRB1	6.38844	7.63472												ILMN_2320850	UBE2D3	11.3946	8.81811		ILMN_1663437	NECAB2	11.4885	15.1132
ILMN_1658416	MRPS18C	7.46426	6.55652												ILMN_2072140	BTF3L4	7.53105	12.6635		ILMN_1711383	STK4	16.9061	9.68477
ILMN_1653504	EDG1	7.50953	6.45858												ILMN_2399627	AP1G1	10.4017	9.76889		ILMN_2090105	TAGLN2	7.30154	19.2492
ILMN_1670638	PITPNC1	6.7771	7.19031												ILMN_1729976	ZNF828	5.6148	14.5248		ILMN_1754753	IL6R	17.454	9.08507
ILMN_1694385	YWHAB	6.0571	7.86909												ILMN_1733680	AZI2	6.36657	13.7147		ILMN_1664608	INPP5A	8.52563	17.9842
ILMN_2086095	ID2	7.34807	6.5663												ILMN_1777721	MAPRE1	7.25133	12.8183		ILMN_1803925	MTMR3	11.2845	15.1709
ILMN_1682428	C1orf59	8.0623	5.84216												ILMN_1792078	ZNF313	11.0104	8.99041		ILMN_1669317	GPR77	6.1282	20.3236
ILMN_1727041	EWSR1	6.28417	7.61834												ILMN_1804419	LRMP	10.5551	9.41359		ILMN_2340259	PDE4B	13.1779	13.2713
ILMN_1736256	CALR	8.21343	5.6768												ILMN_1703720	SF3B14	7.7677	12.1865		ILMN_1693009	FGL2	10.1268	16.3104
ILMN_2217935	RFC1	7.15145	6.73672												ILMN_1814859	DDX47	7.43272	12.5166		ILMN_1770290	CNN2	10.0029	16.4247
ILMN_1686811	LOC402644	7.82511	6.02762												ILMN_1696375	TTC31	11.0104	8.92811		ILMN_1733288	C1RL	14.3186	12.0496
ILMN_1730824	ZNF512	8.30431	5.50947												ILMN_1694219	ARIH1	10.0308	9.88674		ILMN_1787897	CXCL1	17.0335	9.20544
ILMN_1678671	KLHL24	6.364	7.42989												ILMN_1729130	C7ORF42	6.80269	13.0899		ILMN_1651788	MAP3K11	12.2713	13.9593
ILMN_1747223	FRYL	7.6891	6.01441												ILMN_2410540	CASP2	13.3997	6.44849		ILMN_1755077	HEBP2	10.3522	15.8748
ILMN_1768930	U2AF2	7.85615	5.80184												ILMN_2396996	PPCS	8.11687	11.7272		ILMN_1791576	CHSY1	13.0351	13.1289
ILMN_1687279	DHPS	7.44784	6.20323												ILMN_1776102	PSMD10	9.09838	10.6656		ILMN_1670377	ZNF20	12.6869	13.4768
ILMN_2066020	TCEB1	7.92119	5.71336												ILMN_1728180	CROP	10.2399	9.5173		ILMN_2174369	ELOVL5	10.4147	15.725
ILMN_1679949	SLC25A23	7.5322	6.09692												ILMN_1748908	PROSC	7.53762	12.2163		ILMN_1343295	GAPDH	9.46523	16.6723
ILMN_1711617	GMFG	6.54113	7.07853												ILMN_1759252	ADD1	8.74126	10.9798		ILMN_2376403	TSC22D3	5.98353	20.1288
ILMN_2322842	PPHLN1	7.21899	6.3995												ILMN_1699476	RPE	7.66718	12.013		ILMN_2286870	CSNK1D	7.86945	18.2384
ILMN_2076658	MRPL1	7.81145	5.75102												ILMN_1673757	CASP8	11.8911	7.78838		ILMN_1757072	LOC642489	8.39597	17.7058
ILMN_1670172	WDR33	6.34958	7.19882												ILMN_2319077	FAS	5.76558	13.7917		ILMN_1711030	OPLAH	8.1371	17.9315
ILMN_2241775	TROVE2	7.84191	5.70478												ILMN_2318638	TGIF1	6.85134	12.6722		ILMN_1726108	LASS2	5.51768	20.5219
ILMN_1694106	GPD1L	7.75545	5.7131												ILMN_1669015	XPNPEP1	7.81761	11.6393		ILMN_2088124	TMEM154	9.64748	16.3705
ILMN_2150000	C15orf24	6.48571	6.94929												ILMN_1739253	STAMBP	6.24635	13.1437		ILMN_1691892	TAGLN2	5.8173	20.1683
ILMN_1688622	UBQLN1	6.97444	6.41615												ILMN_1662686	USPL1	11.1926	8.14339		ILMN_1752579	ATP6V0A1	12.946	13.0056
ILMN_2207363	RABAC1	6.87812	6.48904												ILMN_1708660	RWDD4A	5.90365	13.3757		ILMN_1761463	EFHD2	6.32697	19.5571
ILMN_1749634	PLRG1	7.23411	6.12593												ILMN_1703379	VPS41	8.43476	10.8164		ILMN_1682699	PBX2	17.9255	7.94344
ILMN_1679640	FXR1	6.66086	6.69009												ILMN_1691181	TXNDC1	6.77395	12.4431		ILMN_1770030	C7orf43	11.3871	14.4655
ILMN_2134062	ALKBH3	6.3993	6.93285												ILMN_1768870	CAPZA2	7.53967	11.6764		ILMN_1784753	PAIP2	7.16333	18.6523
ILMN_2205032	MAGEE1	6.5255	6.76489												ILMN_1810327	HNRPUL2	7.52002	11.6694		ILMN_1811823	MED25	7.24751	18.5161
ILMN_2067708	TFB2M	6.87031	6.39854												ILMN_2332713	SLC25A3	6.07714	13.0821		ILMN_2326071	MYL6	5.7461	20.0097
ILMN_1655154	PTBP1	6.66811	6.58096												ILMN_2050617	CCT6AP1	9.7013	9.44746		ILMN_1731907	LOC643313	6.04702	19.6075
ILMN_1708164	EIF3A	5.5075	7.73861												ILMN_2068435	ZNF700	6.26706	12.8694		ILMN_1706523	FCGR2A	10.1633	15.491
ILMN_1769409	C9orf123	7.52355	5.7128												ILMN_1781102	C14ORF138	5.9495	13.1366		ILMN_2180352	DIP2B	18.0266	7.57923
ILMN_1788701	PSIP1	5.81906	7.38402												ILMN_1677829	SLC9A6	9.77825	9.30083		ILMN_1678032	NR1H2	6.31276	19.1607
ILMN_2380698	DSTN	5.78405	7.39292												ILMN_1788462	AMD1	6.1016	12.9524		ILMN_1777906	RPRC1	8.80385	16.6013
ILMN_1697670	SRRM1	6.45833	6.61339												ILMN_2070210	RNF219	9.21722	9.81369		ILMN_1669502	E2F3	9.50592	15.8375
ILMN_1716445	LOC727761	6.84386	6.22533												ILMN_2073289	MTSS1	7.46653	11.51		ILMN_2349658	TSPO	10.2692	15.0581
ILMN_1776352	MUTED	5.51185	7.53517												ILMN_1793616	RNF38	11.1329	7.71831		ILMN_1766487	LRRC25	10.4004	14.9111
ILMN_1738103	COPE	7.17316	5.86535												ILMN_1721626	ARID5B	5.74498	13.1001		ILMN_2228180	MSRA	5.81218	19.4863
ILMN_1718023	APEH	7.30335	5.72566												ILMN_1808115	ATP7A	6.91656	11.9111		ILMN_1654016	MRLC2	6.34935	18.8781
ILMN_1693490	SEC11A	6.26705	6.75427												ILMN_1776216	TMEM32	7.68647	11.14		ILMN_1782292	LAMP1	6.8313	18.3854
ILMN_1743065	PTPLAD1	7.40331	5.60137												ILMN_1661002	RFWD2	7.56232	11.1981		ILMN_1785785	NCOA1	5.85226	19.3231
ILMN_2223010	VBP1	6.38487	6.56883												ILMN_1766981	UNC50	6.89199	11.8626		ILMN_1752582	RAB5B	6.88618	18.2543
ILMN_1718424	MRPS28	6.02247	6.92557												ILMN_2226917	KIAA0247	11.5018	7.24754		ILMN_1723768	NLRX1	8.45622	16.6457
ILMN_1670439	FYTTD1	5.75819	7.11422												ILMN_2198393	KATNA1	10.252	8.45825		ILMN_2043569	MOSPD2	11.0487	14.0013
ILMN_2104877	CMPK1	5.75859	7.08377												ILMN_1713892	C4ORF34	6.75942	11.9432		ILMN_1677085	RGS19	8.99579	16.035
ILMN_1676611	PHPT1	5.85024	6.93377												ILMN_2115218	ANKRD10	9.76643	8.92259		ILMN_1710482	APLP2	7.25817	17.7125
ILMN_2319000	MATK	6.79198	5.98649												ILMN_1696419	STOM	11.6076	7.07186		ILMN_1652185	IL4R	8.71216	16.2451
ILMN_1664016	ARHGEF18	7.12028	5.63108												ILMN_1683664	LOC650369	7.01614	11.663		ILMN_1815759	CTDP1	6.40021	18.5505
ILMN_1685258	TMEM14B	5.62032	7.07829												ILMN_1815668	GTF2IP1	5.91262	12.6902		ILMN_1784320	ELMO1	10.7588	14.1867
ILMN_1679483	INTS10	6.81632	5.85446												ILMN_1693766	CEP135	7.48918	11.1102		ILMN_2116127	NPEPPS	9.95261	14.9876
ILMN_1762615	FAM175B	7.01572	5.61296												ILMN_1755391	ARL2BP	10.3995	8.19493		ILMN_1717337	2012-03-07	14.4829	10.4557
ILMN_1769782	LAX1	6.37931	6.23477												ILMN_1666739	RBM15	5.54317	13.0392		ILMN_2409596	RAB11FIP1	8.54925	16.3704
ILMN_1744835	MRPL21	5.59957	7.00069												ILMN_1657470	YTHDF3	8.00939	10.5592		ILMN_2402936	LOC440926	11.4626	13.3933
ILMN_1893633	LOC439949	5.63728	6.92125												ILMN_1744822	BECN1	8.53785	9.88637		ILMN_1723662	ABHD2	7.78939	17.0057
ILMN_1729051	MSH6	6.64303	5.89732												ILMN_1725183	TBCE	5.77482	12.6384		ILMN_1686884	IL1RAP	6.77061	18.0104
ILMN_2055477	EXOSC7	6.64054	5.84325												ILMN_1768867	AP3B1	10.0606	8.25247		ILMN_1683658	FKBP1A	7.55885	17.1699
ILMN_1705871	DDHD2	5.71429	6.72509												ILMN_2377733	CASP8	8.15223	10.1209		ILMN_1807283	NDST1	9.19611	15.5124
ILMN_2145997	SP4	6.44376	5.91549												ILMN_1732074	LOC648210	8.37214	9.89365		ILMN_1657129	SKAP2	9.68564	15.0081
ILMN_1745423	UTP3	5.73029	6.62854												ILMN_1664691	DAPP1	5.50239	12.7329		ILMN_1792473	AIF1	7.28581	17.3744
ILMN_1654016	MRLC2	6.615	5.7291												ILMN_1697670	SRRM1	6.77185	11.4299		ILMN_1726175	ITGAX	7.37373	17.2515
ILMN_1661432	NUP43	6.25017	6.0463												ILMN_1719518	ARF4	8.33017	9.86948		ILMN_1703123	AXUD1	10.5001	14.0704
ILMN_1679655	WDR82	5.80222	6.49245												ILMN_1679134	NSMCE4A	7.74896	10.4472		ILMN_1683146	FTH1	7.65663	16.9025
ILMN_2217329	IAH1	6.54149	5.75212												ILMN_2390472	TTC14	7.77714	10.4156		ILMN_2365091	FCAR	10.6267	13.9275
ILMN_2198393	KATNA1	6.33977	5.94271												ILMN_2117716	SFRS17A	9.41979	8.764		ILMN_1654571	FCHO1	9.81115	14.739
ILMN_2340065	UBL5	6.70957	5.53506												ILMN_2213558	TMED10P	7.15644	11.0261		ILMN_2400922	OPRL1	9.738	14.7937
ILMN_1774066	TMEM141	5.59723	6.63614												ILMN_1674421	TM9SF4	8.0658	10.1154		ILMN_1680937	HIST1H2BC	8.69783	15.8142
ILMN_1799688	CDC23	6.60362	5.61237												ILMN_1664756	KPNA4	7.10039	11.0569		ILMN_1747251	LTB4R	11.8732	12.6205
ILMN_1811327	MRPL27	6.06382	6.13548												ILMN_1757732	OSGIN2	7.12857	10.9716		ILMN_1731568	RAB3D	5.71105	18.7699
ILMN_1683859	SLC7A1	6.46643	5.72607												ILMN_1758939	RIPK2	5.53323	12.5253		ILMN_1669523	FOS	18.7885	5.57315
ILMN_1697440	PRPF4	6.46451	5.71726												ILMN_1659923	GNAQ	9.92774	8.09276		ILMN_1776777	ADAR	11.5856	12.7756
ILMN_1681437	DCXR	6.41059	5.75404												ILMN_1728512	YWHAH	8.14443	9.85333		ILMN_1671260	GPR177	6.69675	17.5748
ILMN_1756126	STUB1	6.23999	5.90112												ILMN_1733311	PIGB	7.81429	10.1603		ILMN_1800659	PGM1	6.89459	17.3716
ILMN_2145116	TMEM173	6.56876	5.52349												ILMN_1654370	TESK2	8.47184	9.47231		ILMN_1731275	DPEP3	10.7927	13.4729
ILMN_1785266	OFD1	6.11523	5.94736												ILMN_2093674	GMFB	5.95536	11.9714		ILMN_1746436	HCG27	9.81	14.4485
ILMN_1738554	LOC647346	6.33002	5.64705												ILMN_1794260	FBXL10	6.92101	10.9805		ILMN_1811955	PRMT5	5.53606	18.7166
ILMN_1779185	CYTSA	6.14672	5.50704												ILMN_1781207	FYN	6.88154	10.9715		ILMN_1675448	ZFP36L1	12.4644	11.7359
ILMN_1715569	CCDC53	5.67885	5.89836												ILMN_1721659	LOC643668	6.96241	10.8588		ILMN_2410742	JMJD1C	5.84633	18.35
ILMN_2092536	HSPE1	5.71607	5.78384												ILMN_2322935	MAPKAPK5	8.40319	9.39037		ILMN_1745329	PRR14	10.8302	13.2879
															ILMN_2075440	PDIA3P	7.07165	10.7161		ILMN_1768396	AURKAIP1	10.225	13.865
															ILMN_2116661	PRPSAP2	11.029	6.73301		ILMN_1687533	SEMA4D	10.6884	13.4015
															ILMN_1716816	TMEM87A	6.6716	11.0346		ILMN_2308849	MYADM	9.05471	15.003
															ILMN_1749915	C1ORF63	8.3854	9.23616		ILMN_1713978	SDF2	8.71679	15.3348
															ILMN_1745497	C12ORF26	7.09415	10.5262		ILMN_1808148	SMCHD1	7.4684	16.5801
															ILMN_1797813	SUZ12	6.80181	10.7862		ILMN_1711493	PRAM1	8.72718	15.1867
															ILMN_1767360	IL10RB	7.78472	9.75255		ILMN_1804117	FAM89B	8.07344	15.7641
															ILMN_2062381	LCOR	9.54165	7.98615		ILMN_2375002	MAP4K4	9.47694	14.3528
															ILMN_1779014	TSPYL1	6.84963	10.6372		ILMN_1668960	MID1IP1	17.5791	6.15057
															ILMN_1765132	LACTB	5.64888	11.8176		ILMN_2320888	CXCR4	14.9688	8.73315
															ILMN_2209748	DERL1	10.8165	6.59763		ILMN_2347380	ARHGEF11	6.91173	16.7197
															ILMN_2151441	FAM103A1	7.3856	9.95605		ILMN_1795949	CORO7	10.5408	13.0867
															ILMN_1718853	UQCRC2	6.52697	10.8138		ILMN_1678054	TRIM21	8.01502	15.5868
															ILMN_1714108	TP53INP1	6.51879	10.7957		ILMN_2112580	FCGR3A	8.65262	14.934
															ILMN_1780842	RANBP6	6.10569	11.1962		ILMN_1724668	REPS2	13.5074	10.028
															ILMN_1680378	RBM45	9.10064	8.19		ILMN_1746598	SCNM1	5.98849	17.5323
															ILMN_1697639	OGT	8.04847	9.17258		ILMN_1704730	CD93	9.11563	14.2975
															ILMN_1666933	ASH2L	8.8193	8.3642		ILMN_1798659	CCDC28A	9.59495	13.7997
															ILMN_1785988	CSNK1A1	7.96541	9.20861		ILMN_1726547	MAP3K5	8.61235	14.6964
															ILMN_2391355	STAMBP	6.84236	10.3186		ILMN_1657810	PPM1M	8.945	14.3428
															ILMN_2380740	MTO1	11.3521	5.77196		ILMN_2375141	C10orf4	7.09832	16.186
															ILMN_2331082	MS4A7	6.32728	10.7825		ILMN_2408851	ARHGAP30	8.29606	14.9222
															ILMN_2345512	PPP4R1	6.90914	10.1702		ILMN_1756006	ATG2A	9.6957	13.4839
															ILMN_1727041	EWSR1	8.12324	8.94739		ILMN_1755843	SLC26A8	13.5999	9.55014
															ILMN_1750969	C9ORF10OS	6.6654	10.4025		ILMN_2128750	PTTG1IP	7.10935	15.8596
															ILMN_2383435	PSMD10	6.78096	10.1014		ILMN_1812281	ARG1	6.94286	15.9903
															ILMN_1674506	MED23	6.41779	10.4295		ILMN_1668865	SLC2A14	13.7607	9.16093
															ILMN_1682658	EPM2AIP1	7.34711	9.36298		ILMN_1804895	C7orf53	9.42656	13.4337
															ILMN_2150258	ZFP36L2	7.09019	9.51243		ILMN_1678928	SLCO3A1	9.60844	13.2275
															ILMN_2339796	CDC16	10.762	5.82818		ILMN_2088825	CENTB2	12.015	10.8163
															ILMN_1810100	PBX3	5.99581	10.5842		ILMN_1764177	JARID2	14.4746	8.31329
															ILMN_1769566	ATG3	5.88166	10.6953		ILMN_1775268	HECW2	11.5359	11.2517
															ILMN_1701696	LOC644863	6.94859	9.54266		ILMN_1657515	RPS6KA5	11.8125	10.9595
															ILMN_1773847	DYNC1I2	7.36279	9.024		ILMN_1738767	PLP2	7.54819	15.1987
															ILMN_1674243	TFRC	7.67972	8.63767		ILMN_1652128	LMBRD1	16.2653	6.4541
															ILMN_1667201	WDR51B	5.83355	10.4715		ILMN_1703327	PSTPIP1	5.69264	17.0146
															ILMN_2414762	TLR10	6.77117	9.48291		ILMN_1758658	FADD	10.0327	12.665
															ILMN_1691927	BTBD1	6.10743	10.1391		ILMN_2210601	RNASEL	8.68586	13.9877
															ILMN_1686626	BAT1	7.48583	8.71867		ILMN_1770085	BTG2	12.5928	10.0743
															ILMN_1807737	SFRS17A	5.97978	10.1788		ILMN_1795467	LOC399715	6.13223	16.4186
															ILMN_1761069	UVRAG	8.86493	7.26877		ILMN_2392286	IP6K1	12.8776	9.62765
															ILMN_1777663	TOP2B	10.2026	5.92382		ILMN_2400874	SCYL1	7.70504	14.7748
															ILMN_1703244	MAP1LC3B	9.21968	6.90297		ILMN_1771003	HAUS4	7.78946	14.6674
															ILMN_1669033	NCOA1	7.67445	8.43683		ILMN_1730176	ITGAX	8.94228	13.4904
															ILMN_1733696	IMP3	6.16491	9.91642		ILMN_1720771	STX11	11.151	11.2478
															ILMN_1739985	TAGAP	8.77446	7.3018		ILMN_1716080	CBL	13.2267	9.17123
															ILMN_1798308	AHSA2	8.36524	7.67867		ILMN_1795704	KIAA0232	13.8259	8.54347
															ILMN_1727309	FAM82C	9.69608	6.31967		ILMN_1728224	OGFR	8.5679	13.7934
															ILMN_2228873	STARD3NL	6.18084	9.75686		ILMN_2205882	NSUN7	9.60973	12.7342
															ILMN_1673215	PCBP1	5.70322	10.2247		ILMN_2193591	UNC93B1	7.87391	14.388
															ILMN_2257665	PARL	5.59912	10.2779		ILMN_1724753	NIN	11.3205	10.9218
															ILMN_1762712	HHEX	6.22706	9.63619		ILMN_2122374	FAM49B	12.173	10.0643
															ILMN_1741204	KLHDC2	7.50983	8.29898		ILMN_1804396	C14orf4	6.56471	15.6603
															ILMN_1665538	SKP2	6.56138	9.21542		ILMN_1755589	DIP2B	7.93616	14.24
															ILMN_1705047	TLR8	6.12668	9.61603		ILMN_1659206	RARA	13.3289	8.82588
															ILMN_2088410	PSMG2	6.01684	9.67045		ILMN_1745697	MGRN1	11.917	10.1862
															ILMN_1776005	DC2	5.82418	9.86179		ILMN_1782385	POLR2A	8.03059	14.0667
															ILMN_1730658	YTHDF2	6.37782	9.25924		ILMN_1682717	IER3	15.3598	6.63316
															ILMN_2147435	MAN2A1	6.0496	9.56601		ILMN_2359789	RAC1	9.00434	12.9726
															ILMN_1748476	NOP5/NOP58	6.46748	9.13198		ILMN_1795158	FGR	8.16906	13.8045
															ILMN_1727813	BRP44	5.66898	9.86831		ILMN_1664826	FBXO33	6.50027	15.4165
															ILMN_1746494	FNTA	9.13071	6.35932		ILMN_2210729	STYXL1	5.61153	16.302
															ILMN_2181968	CBL	8.36919	7.09345		ILMN_1672660	MBP	8.40637	13.4843
															ILMN_1772677	CNOT4	5.94855	9.47905		ILMN_2410909	AKT1	8.18181	13.6983
															ILMN_2376133	KIAA1191	5.55554	9.83838		ILMN_2371724	CEACAM1	8.03049	13.8483
															ILMN_2394498	SYF2	7.79365	7.55977		ILMN_1664706	LOC653604	7.74349	14.124
															ILMN_2333774	TAGAP	8.71085	6.63214		ILMN_1685493	TMCC3	9.20742	12.6554
															ILMN_1787109	CLK2	8.37122	6.95819		ILMN_1738784	PPP2R5A	8.6024	13.2104
															ILMN_1798657	TBL1XR1	8.70804	6.61087		ILMN_1740351	KIAA0174	6.0213	15.7318
															ILMN_2374164	HERPUD1	7.81905	7.46055		ILMN_1721563	TMEM127	9.05024	12.6562
															ILMN_1661138	GON4L	9.1002	6.13666		ILMN_1702229	CECR6	9.99338	11.6495
															ILMN_2055700	SLBP	5.54092	9.68759		ILMN_1769245	GLIPR1	10.6199	11.0033
															ILMN_1749821	MED28	6.69231	8.51399		ILMN_1685009	ITGAM	8.51398	13.0856
															ILMN_1671839	TAF1C	7.85639	7.33924		ILMN_1678504	RHOT1	7.33857	14.2426
															ILMN_1663092	CITED2	7.25382	7.93966		ILMN_2349600	BRD8	7.91794	13.6346
															ILMN_1800787	RFTN1	6.1498	9.02302		ILMN_1653134	TMEM188	7.5563	13.987
															ILMN_1753353	SLBP	7.11518	8.03907		ILMN_1790781	DHRS13	10.5056	11.0032
															ILMN_1719611	CCT6A	7.45476	7.68458		ILMN_1702487	SGK	11.6672	9.79935
															ILMN_1678140	TTC4	8.38315	6.69696		ILMN_1713751	ADAM19	14.664	6.79569
															ILMN_1793829	TMCO1	6.86528	8.01105		ILMN_2312340	LILRB2	6.38339	15.0722
															ILMN_2248589	DHX40	6.40266	8.4733		ILMN_2117223	ROD1	10.0554	11.374
															ILMN_1729509	C1ORF43	6.27515	8.5926		ILMN_2386982	PRKCZ	7.73885	13.649
															ILMN_1697440	PRPF4	7.06648	7.72688		ILMN_1753312	PLXDC2	12.34	9.0196
															ILMN_2182335	ARID2	6.67902	8.07231		ILMN_1714418	FAM101B	10.7341	10.4791
															ILMN_1731644	SETDB2	8.45905	6.22578		ILMN_1669905	DCP2	5.56345	15.6452
															ILMN_1718924	ETFA	8.31115	6.35372		ILMN_2413808	CD53	11.358	9.84296
															ILMN_1760338	LOC643357	7.20157	7.44089		ILMN_1701789	IFIT3	6.93305	14.1999
															ILMN_1802251	PTTG1IP	6.07179	8.52394		ILMN_2363392	TNFSF14	6.99832	14.1346
															ILMN_1742074	C8ORF76	7.64833	6.94343		ILMN_2125010	SKAP2	8.77378	12.3485
															ILMN_1755909	C20ORF11	5.84939	8.71954		ILMN_1779486	FAM126B	6.63853	14.4808
															ILMN_1778177	ZNF207	6.90942	7.65464		ILMN_1732143	FLJ42957	7.13433	13.8624
															ILMN_1777528	NCBP1	8.24408	6.29834		ILMN_2405602	OSBPL1A	5.72958	15.2044
															ILMN_1805652	PPP2R2D	7.58149	6.94589		ILMN_1683598	ACSL4	9.17467	11.7347
															ILMN_1742577	GTPBP4	5.51601	8.99302		ILMN_1792587	VPS4B	6.2403	14.6494
															ILMN_1690690	SEC23IP	5.77214	8.72499		ILMN_2157510	BLOC1S1	5.71228	15.099
															ILMN_1792092	ZCCHC8	8.44628	6.03407		ILMN_1655340	RNF181	8.76363	12.0455
															ILMN_1780773	LOC400027	6.21318	8.23468		ILMN_1755727	KDM5B	10.2622	10.5396
															ILMN_1765076	APPL2	5.55955	8.87794		ILMN_1671516	CIR1	9.01798	11.7579
															ILMN_1714527	VAMP3	7.7155	6.66191		ILMN_1737604	FLJ10986	6.10344	14.6512
															ILMN_1694888	TAF2	7.37491	6.99553		ILMN_1654778	LSP1	8.38959	12.3483
															ILMN_1699362	IK	6.31736	8.03678		ILMN_2366719	NSFL1C	6.28679	14.3846
															ILMN_1671837	LOC644739	7.22956	7.0188		ILMN_1750321	LBA1	7.01021	13.6187
															ILMN_1662954	CCT7	6.89988	7.28692		ILMN_1803739	RPGRIP1	12.2621	8.35701
															ILMN_2323774	RPAIN	7.98696	6.19881		ILMN_1673113	F2RL1	8.12943	12.446
															ILMN_1702783	LOC652595	5.69081	8.45853		ILMN_2340065	UBL5	7.40118	13.1437
															ILMN_1667068	ZC3HAV1	8.40122	5.69896		ILMN_1768870	CAPZA2	10.8708	9.63372
															ILMN_1755075	IDI1	5.50832	8.57065		ILMN_1691188	UIMC1	7.47422	13.0013
															ILMN_1705663	DMXL2	5.99448	8.03987		ILMN_1686981	SULF2	6.9242	13.5369
															ILMN_1677466	DUSP6	7.31689	6.58061		ILMN_1690063	LOC651143	10.1573	10.2976
															ILMN_2366246	SEC23B	7.09089	6.75038		ILMN_1708728	H2AFJ	6.17378	14.269
															ILMN_1789233	VPS37C	7.36858	6.42845		ILMN_1791840	RALBP1	7.66309	12.7559
															ILMN_1678268	VPS8	8.0638	5.69816		ILMN_1716815	CEACAM1	8.04967	12.2434
															ILMN_1707199	WDR20	5.77804	7.96556		ILMN_1795856	LOC644935	7.04558	13.2116
															ILMN_1660661	TCP1	7.27787	6.364		ILMN_1725862	USP3	8.03514	12.1312
															ILMN_1666156	MORF4L2	6.61212	7.00828		ILMN_1715968	MLL4	8.26802	11.8621
															ILMN_2059505	ARPP-19	6.03201	7.56929		ILMN_1753819	RFFL	11.0253	9.09121
															ILMN_1714599	CAMLG	5.61439	7.9536		ILMN_1666727	ZNF586	7.03405	13.0773
															ILMN_1804676	VAMP4	7.28753	6.21791		ILMN_2261076	NEDD9	9.6888	10.356
															ILMN_2156953	ZFAND6	6.12537	7.35676		ILMN_1700633	ABHD4	7.97521	12.0319
															ILMN_1800855	PPTC7	5.93595	7.48084		ILMN_1656676	ZYG11B	7.17305	12.768
															ILMN_1656145	GOT1	5.50113	7.87581		ILMN_1687947	HIST1H2BE	8.77967	11.156
															ILMN_1712634	TIA1	6.61815	6.72749		ILMN_1667257	SDHB	6.4035	13.4686
															ILMN_2256765	CDC16	7.18635	6.1139		ILMN_1734895	SFT2D1	5.89375	13.9777
															ILMN_1725760	YTHDC2	7.41154	5.82202		ILMN_1736796	RB1CC1	8.5683	11.2661
															ILMN_2344850	VPS26A	6.57607	6.45621		ILMN_1767894	POLB	7.16522	12.6015
															ILMN_2401822	FTSJ1	6.89442	6.12876		ILMN_2085760	ARPC1B	5.58487	14.0858
															ILMN_1727389	CDC16	5.87158	7.14213		ILMN_1807448	FAM8A1	7.92567	11.7261
															ILMN_1655377	MRPS22	5.78039	7.18958		ILMN_2095759	OGFRL1	11.5987	7.99883
															ILMN_1751452	NDFIP1	5.78523	7.11112		ILMN_1717334	VAV1	5.73292	13.799
															ILMN_1679731	SLC15A4	7.39312	5.50263		ILMN_2189222	KLHL8	6.32092	13.1992
															ILMN_1713058	PSTPIP2	5.61021	7.28006		ILMN_2309180	SMARCD3	6.80925	12.6995
															ILMN_1654560	TLR6	7.11328	5.68102		ILMN_1791847	DAPK2	9.32395	10.153
															ILMN_2278636	CUTL1	7.17568	5.5262		ILMN_1770803	BNIP2	8.71138	10.7534
															ILMN_1679797	ADARB1	5.75966	6.79037		ILMN_2170949	SNX10	10.5677	8.86682
															ILMN_1706523	FCGR2A	6.05784	6.38289		ILMN_1675674	UBE4B	12.7416	6.64095
															ILMN_1807088	TTC33	5.64813	6.78879		ILMN_1713031	PGCP	10.0324	9.26946
															ILMN_1809488	SPCS2	6.84518	5.57974		ILMN_2368318	FGR	7.36508	11.9045
															ILMN_1720819	LOC653566	5.57377	6.67227		ILMN_1808979	CLEC4D	8.76847	10.4868
															ILMN_1803423	ARHGEF6	6.29001	5.75083		ILMN_1661695	IRAK3	5.50359	13.7205
															ILMN_2364971	PPP2R5C	6.02775	5.97103		ILMN_1758938	SLC31A2	5.96929	13.2481
															ILMN_1678808	KIAA0831	6.18712	5.7692		ILMN_1768197	ROD1	12.8327	6.36658
															ILMN_2246510	TSC1	5.76243	6.18505		ILMN_1754489	FBXL20	8.92558	10.1892
															ILMN_1726769	CNDP2	5.66789	6.26979		ILMN_1801246	IFITM1	8.22055	10.8907
															ILMN_1657436	FGFR1OP2	6.28388	5.55467		ILMN_1748694	NHSL2	7.49329	11.5941
															ILMN_1753426	KIAA0556	5.5627	5.87117		ILMN_1728478	CXCL16	6.00888	13.075
																				ILMN_2311779	TMUB2	12.9911	6.00286
																				ILMN_1780671	PLEKHG3	9.5085	9.41553
																				ILMN_1737157	GRAMD1A	11.3017	7.60878
																				ILMN_1654518	LRCH4	6.53487	12.3343
																				ILMN_1747504	AHCTF1	10.1957	8.62874
																				ILMN_2359601	CAMK2G	10.8315	7.89274
																				ILMN_1745954	CORO1C	5.9513	12.7597
																				ILMN_1688011	UPF1	6.70043	11.9675
																				ILMN_1769886	SIRPD	7.22759	11.2835
																				ILMN_2396444	CD14	7.64274	10.8164
																				ILMN_2353633	EMR2	6.46615	11.9211
																				ILMN_1678143	ARHGDIB	7.37675	10.9028
																				ILMN_2373495	H2AFY	9.22552	9.04841
																				ILMN_1670410	LOC641710	6.83693	11.4222
																				ILMN_1759436	NOSIP	6.52757	11.6678
																				ILMN_2399769	GPR177	6.49948	11.688
																				ILMN_1788462	AMD1	6.09793	12.075
																				ILMN_1733861	ARHGEF11	5.71581	12.3627
																				ILMN_1770818	LOC642342	7.45434	10.6154
																				ILMN_2403906	ARFIP1	5.65246	12.397
																				ILMN_2103761	TLE4	9.21806	8.81415
																				ILMN_1809850	RCN3	7.45521	10.5583
																				ILMN_2406043	VPS24	10.0156	7.99767
																				ILMN_1809139	AHCTF1	8.18348	9.79845
																				ILMN_2411282	QSOX1	5.84792	12.1326
																				ILMN_1737705	UHRF1BP1L	9.44086	8.5381
																				ILMN_1682930	SIPA1	7.96877	10.01
																				ILMN_1801216	S100P	8.60665	9.35971
																				ILMN_1815010	RNF141	5.90113	11.9427
																				ILMN_1687410	OSBPL11	7.57553	10.2475
																				ILMN_2041190	F2RL1	7.69715	10.108
																				ILMN_1676010	SP1	10.4673	7.3339
																				ILMN_1699836	LSP1	10.8327	6.94314
																				ILMN_2324989	IKBIP	9.97831	7.79051
																				ILMN_1726289	C12orf35	10.8638	6.87645
																				ILMN_1765222	CARS2	9.30317	8.40137
																				ILMN_1709549	PLEKHM1	6.19802	11.4742
																				ILMN_2095840	MYST3	5.81739	11.8226
																				ILMN_1797031	HSPBAP1	5.67945	11.9118
																				ILMN_1779234	CXCL6	8.14428	9.39577
																				ILMN_1800425	SLC9A1	8.43607	9.09005
																				ILMN_1781560	ST3GAL6	6.88331	10.6364
																				ILMN_1744034	GPR27	8.46318	9.05546
																				ILMN_1800164	PPFIA1	11.8031	5.70725
																				ILMN_1800733	MANBA	8.88335	8.52486
																				ILMN_2264625	NIPBL	6.21324	11.1685
																				ILMN_1734153	GDI1	7.14738	10.1984
																				ILMN_1713636	S100A6	7.59786	9.67754
																				ILMN_1810759	C2orf25	8.06104	9.16543
																				ILMN_1780546	OSM	8.89255	8.32311
																				ILMN_1802252	GAPDH	6.30847	10.8933
																				ILMN_1772981	EPN1	5.83951	11.3215
																				ILMN_1711069	YPEL5	5.72494	11.4133
																				ILMN_1811702	GRN	5.63553	11.4876
																				ILMN_1688580	CAMP	6.653	10.469
																				ILMN_1767193	CR1	6.168	10.9115
																				ILMN_1784300	TUBA4A	8.25128	8.77836
																				ILMN_1735143	C1orf38	7.19767	9.76703
																				ILMN_1771664	CLEC4E	7.19555	9.66427
																				ILMN_1766539	LOC643319	6.40428	10.368
																				ILMN_1701216	BANP	5.88744	10.8079
																				ILMN_2375003	MAP4K4	7.36669	9.2758
																				ILMN_2230862	GYG1	6.49973	10.0926
																				ILMN_1776121	MGC42367	6.9494	9.58656
																				ILMN_1765122	MAP3K2	5.75826	10.7389
																				ILMN_1773154	NFKBIA	6.25256	10.2386
																				ILMN_2390859	NFKB2	5.86313	10.625
																				ILMN_2324994	IKBIP	8.34614	8.10435
																				ILMN_2399140	RAB5C	7.79783	8.59935
																				ILMN_1806713	ZNF18	6.67657	9.71653
																				ILMN_1716488	PACS1	7.96428	8.35146
																				ILMN_2283325	GPR177	6.15064	10.1622
																				ILMN_1798475	CSF2RB	5.70308	10.542
																				ILMN_1757732	OSGIN2	9.42455	6.80844
																				ILMN_1662617	PPP2R3C	7.54644	8.64719
																				ILMN_1766054	ABCA1	7.2376	8.95363
																				ILMN_2183216	TTRAP	9.18997	6.9977
																				ILMN_1752117	TMEM55A	10.2469	5.88694
																				ILMN_1669888	CSTA	7.00845	9.03735
																				ILMN_1760320	GNB1	6.93727	9.01398
																				ILMN_1670322	FCHO2	5.569	10.3397
																				ILMN_1727738	RAB33B	6.26952	9.57829
																				ILMN_1722811	CDKN1B	8.00155	7.8438
																				ILMN_1658798	MEGF9	7.16077	8.67844
																				ILMN_2158242	SHOC2	5.60475	10.1764
																				ILMN_1675956	LYST	7.40631	8.36351
																				ILMN_1743205	ABCA7	7.84451	7.9174
																				ILMN_1695246	KLHDC8B	6.31142	9.42819
																				ILMN_1723486	HK2	6.25238	9.41353
																				ILMN_1765258	HLA-E	6.21474	9.38406
																				ILMN_2313074	DEDD	6.25164	9.22513
																				ILMN_1700660	RNF135	6.27615	9.18079
																				ILMN_1720829	ZFP36	6.82173	8.63222
																				ILMN_2329927	ABCG1	8.6052	6.73688
																				ILMN_1653828	CHFR	5.79755	9.495
																				ILMN_1730799	PHF12	6.39859	8.84765
																				ILMN_2214603	PPP2R3C	8.99538	6.24705
																				ILMN_1805643	RILPL1	7.36172	7.84604
																				ILMN_1729801	S100A8	5.64176	9.49505
																				ILMN_1655561	ARPC3	6.94164	8.00178
																				ILMN_1809400	FAM49B	6.23367	8.68032
																				ILMN_1664921	PPP6C	6.30608	8.59571
																				ILMN_2339377	DNM2	5.93332	8.91596
																				ILMN_1685369	SLU7	8.34536	6.49398
																				ILMN_1775734	SH2D3C	6.73729	8.05404
																				ILMN_1731064	CABC1	7.48508	7.3007
																				ILMN_1701854	GNG5	7.52954	7.24272
																				ILMN_1757781	SAP30L	5.51589	9.23425
																				ILMN_1771627	ZMIZ1	8.06179	6.61552
																				ILMN_1761804	ALDH9A1	7.84706	6.74077
																				ILMN_1782459	OSBPL8	7.89915	6.53734
																				ILMN_2112357	CD300LF	5.81714	8.60095
																				ILMN_1808707	FSCN1	6.32959	8.04313
																				ILMN_1707783	CCDC72	6.14478	8.17811
																				ILMN_1724066	PLCB2	7.11356	7.15382
																				ILMN_1722872	MYH9	7.61248	6.58744
																				ILMN_2394210	SLC26A8	5.67303	8.44386
																				ILMN_1778144	FLJ20489	5.74353	8.36406
																				ILMN_2219712	HMGB2	5.93632	8.16604
																				ILMN_1706539	KDM3B	7.30209	6.73501
																				ILMN_1662846	GPR160	7.83738	6.13763
																				ILMN_1798458	KIAA1026	5.9586	7.71491
																				ILMN_1678061	CASS4	5.92062	7.69422
																				ILMN_1748124	TSC22D3	6.34302	7.21864
																				ILMN_1786920	JARID1A	6.84071	6.58225
																				ILMN_2291954	SLA	7.52331	5.82199
																				ILMN_1718977	GADD45B	6.23427	7.08929
																				ILMN_1773380	UNC13D	6.57474	6.51126
																				ILMN_1667748	ANKRD33	5.93416	7.06516
																				ILMN_1760620	TMEM33	5.77642	7.19889
																				ILMN_1811616	EEPD1	6.13044	6.54048
																				ILMN_1683827	VPS24	5.5884	7.07585
																				ILMN_1806015	LOC391045	6.93059	5.63229
																				ILMN_1732300	POLR2C	5.85618	6.58632
																				ILMN_1792682	MCTP2	6.55927	5.86315
																				ILMN_1672496	DNAJA1	6.6339	5.66862
																				ILMN_1801767	ABHD3	6.34717	5.70447
																				ILMN_1708375	IRF1	5.98691	5.53251
																				ILMN_1738424	CDC42	5.84536	5.56996
																									509 Genes into ToppFun					180 Genes into ToppFun
																									RNA binding	51/852	1e-06			NAD+ ADP-ribosyltransferaase	5 of 26	0.001	GO:0003950
																														type-1 interferon signaling	25/69	1e-30	GO:0060337
																														cytokine-mediated signaling	31/234	1e-23	GO:0019221
																														response to virus	29/195	1e-23	GO:0009615
																														altered susceptibility to infection	26/388	2e-10	MP:0001793
																														increase susceptibility to viral infection	14/81	5e-10	MP:0002418
																														abnormal interferon level	12 of 75	7e-08	MP:0008750
																									NFMUE1	17/1953
																									miR-483	56/848	2e-08			IRF	22/158	5e-18
																									miR-577	44/672	6e-06			IRF7	17/212	2e-09
																									miR-193b	49/836	2e-05			ISRE	15/187	4e-08
																									miR-3172	48/837	7e-05			ICSBP	14/201	1e-06
																									Vitamin E	65/1479	0.036			Zidovudine	49/378	1e-36
																														PI-PC acid	27/291	8e-15
																														imiquimod	16/132	1e-09
																														bare lymphocyte syndrome	2 of 3	0.03
