# Supplementary material for: Blood-Informative Transcripts Define Nine Common Axes of Peripheral Blood Gene Expression
Source: PLoS Genet. 2013 Mar 14;9(3):e1003362. doi: 10.1371/journal.pgen.1003362 (PMC3597511; doi:10.1371/journal.pgen.1003362)
Supplement: Dataset S3 — ToppFun gene ontology analysis of each of the 9 Axes. The top 500 genes listed in Dataset S1 were entered into ToppFun [19] on November 27, 2012. This sheet reports the major independent enrichments scores for each axis with respect to Gene Ontology classes (GO), Human or Mouse Phenotypes (HP or MP), Transcription Factor or miRNA binding sites, and human diseases where present. P-values in column C are Bonferroni-adjusted, and numbers in column B show the number of genes in the Axis/Number of genes in the genome annotated to the relevant term. Total number of genes per axis is less than 500 because not all probes are annotated and some are duplicated, and for Axes 2, 3, 7 and 9 fewer than 500 are associated with the Axis at Bonferroni significance level in both studies. (XLSX) [file pgen.1003362.s003.xlsx]

## Sheet: ToppFun
Axis 1: 437 genes input into ToppFun
Structural constituent of ribosome	63/164	1E-61	GO:0003735
RNA binding	81/901	4E-28	GO:0003723
Cotranslational protein targeting to membrane	53/107	8E-58	GO:0006613
Translational termination	49/94	1E-54	GO:0006415
Decreased liver function	7/54	.01	HP:0001410
Encephalopathy	7/52	.01	HP:0001298
Abnormal T cell physiology	24/517	6E-04	MP:0002444
Abnormal leukopoiesis	30/747	4E-04	MP:0005460
Abnormal lymphocyte morphology	34/938	5E-04	MP:0002619
ELK1	53/871	6E-07
NRF2	16/193	.03
Anemia	5/9	1E-05
T negative SCID	3/4	.0016
Additional Axis 1: Just the top 200 genes input into ToppFun
Lymphopenia	5/44	.0015	HP:0001888
Abnormal hematopoiesis	27/1435	.0050	MP:0002123
Axis 2: 224 genes input into ToppFun
Oxygen transporter activity	6/14	3E-06	GO:0005344
Wound healing	28/656	3E-06	GO:0042060
Blood coagulation	22/524	3E-04	GO:0050817
Platelet alpha granule	9/64	9E-06	GO:0031091
Abnormality of hematopoeitic system	24/529	8E-06	HP:0001871
Abnormal platelet aggregation	5/15	9E-04	HP:0003540
Abnormal mean corpuscular volume	11/67	2E-06	MP:0000226
GATA3	7/198	.02
Hereditary elliptocytosis	3/4	0.0018	D004612
Hemolytic anemia	2/5	.03	D000743
Axis 3: 96 genes input into ToppFun
B cell activation	14/182	2E-10	GO:0042113
Lymphocyte activation	17/510	3E-07	GO:0046649
Positive regulation of immune system process	18/592	4E-07	GO:0002684
External side of plasma membrane	12/252	4E-07	GO:0009897
Cell surface	14/578	8E-05	GO:0009986
Abnormal B cell morphology	30/464	4E-19	MP:0004939
Abnormal immunoglobulin level	26/389	4E-16	MP:0002490
Abnormal humoral immune response	26/421	3E-15	MP:0001800
miR-486	14/694	.01
miR-146a	6/105	.02
Common variable immunodeficiency	2/3	.01	D017074
Agammaglobulinonemia	2/4	.02	D000361
Systemic lupus erythromatosus	4/54	.03	D008180
Axis 4: 457 genes input into ToppFun
RNA binding	51/901	6E-06	GO:0003723
ubiquitin-dependent protein catabolism	32/380	3E-06	GO:0006511
mRNA metabolic processes	42/635	9E-06	GO:0016071
intracellular transport	61/1195	5E-05	GO:0046907
RNA splicing	28/328	2E-05	GO:0008380
Nuclear body	21/286	2E-03	GO:0016604
Endosome	35/573	1E-04	GO:0005768
Hematological neoplasia	12/132	0.011	HP:0004377
Embryonic lethality	82/1264	7E-13	MP:0008762
Abnormal embryonic growth/weight	48/702	2E-06	MP:0002088
ELK1	52/871	2E-04
NRF1	41/654	0.001
GABP	33/560	0.04
miR-590	129/1476	7E-39
miR-548n	89/1010	2E-25
miR-561	87/967	2E-25
miR-655	77/789	3E-24
miR-607	82/934	6E-23
Skin diseases	7/59	0.04	D012871
Thyroid cancer	3/7	0.05	C536915
Axis 5: 420 genes input into ToppFun
Cytokine receptor	10/62	6E-04	GO:0004896
Protein domain specific binding	34/633	7E-04	GO:0019904
Response to wounding	76/1169	9E-15	GO:0009611
Immune response	68/1066	2E-12	GO:0006955
Inflammatory response	40/521	1E-08	GO:0006954
Phagocytic vesicle	11/49	2E-06	GO:0045335
Intrinsic to plasma membrane	61/1394	3E-05	GO:0031226
Phagocytic vesicle	11/49	2E-06	GO:0045335
Osteomyelitis	6/22	0.0093	HP:0002754
Abnormal adaptive immunity	86/1110	7E-14	MP:0002420
Abnormal innate mmunity	55/484	3E-14	MP:0002419
Abnormal neutrophil physiology	30/140	6E-14	MP:0002463
Abnormal granulocyte physiology	36/201	1E-14	MP:0002462
ETS2	44/869	.0068
PEA3	16/191	.02
AP1	17/213	.02
miR-1207-5p	15/171	.0089
Liver diseases	9/50	.0015	D008107
Axis 6: 458 genes input into ToppFun
SOSS Complex	3/4	0.01	GO:0070876
Abnormal embryonic tissue morphology	31/738	.04	MP:0002085
miR-483-5p	57/848	1E-10
miR-590-3p	44/795	5E-05
miR-193b	44/836	2E-04
miR-3172	44/837	2E-04
miR-155	63/1449	3E-04
Additional Axis 6: Just the top 200 genes input into ToppFun
Growth retardation	2/3	.05	HP:0001530
Axis 7: 168 genes input into ToppFun
double stranded RNA binding	11/44	3E-11	GO:0003725
NAD+ ADP-ribosyltransferase activity	5/26	9E-04	GO:0003950
response to virus	40/257	2E-35	GO:0009615
response to biotic stimulus	56/735	3E-34	GO:0009607
type I interferon-mediated signaling	25/72	1E-30	GO:0060337
host cell	7/12	5E-10	GO:0043657
Abnormal response to infection	30/445	4E-13	MP:0005025
Increased susceptibility to viral infection	16/89	3E-12	MP:0002418
Abnormal interferon level	14/81	3E-10	MP:0008750
Abnormal antigen presentation via MHC-I	7/13	5E-08	MP:0001836
IRF	17/187	1E-10
IRF7	17/212	1E-09
ISRE	16/187	2E-09
ICSBP	14/201	6E-07
Bare lymphocyte syndrome	2/3	.04	OMIM 604571
Axis 8: 451 genes into ToppFun
RNA binding	51/901	4E-08	GO:0003723
RNA processing	48/671	2E-10	GO:0006396
Intracellular transport	52/1195	8E-04	GO:0046907
Ribonucleoprotein complex	38/595	2E-07	GO:0030529
Abnormal B cell activation	13/147	0.03	MP:0008217
Embryonic lethality	48/1264	0.05	MP:0008762
NRF1	36/654	0.0011
ARNT	15/194	0.035
miR-590-3p	93/1476	4E-20
miR-548c	66/1196	2E-10
miR-607	57/934	2E-10
miR-548a	53/827	2E-10
Axis 9: 234 genes into ToppFun
Enzyme binding	33/1227	0.0024	GO:0019899
Regulation of programmed cell death	43/1383	4E-06	GO:0043067
Signal transduction by phosphorylation	28/728	5E-05	GO:0023014
Nuclear body	13/286	.0082	GO:0016604
Abnormal B cell number	21/378	7E-05	MP:0002458
Abnormal T-cell morphology	28/693	2E-04	MP:0008037
Abnormal leukopoiesis	29/747	3E-04	MP:0005460
STAT5A	16/208	1E-05
STAT6	14/208	5E-04
mir-548	37/895	2E-08	PITA
miR-155	45/1449	1E-06	MicroRNA.org
miR-34b	38/1219	3E-05	MicroRNA.org
miR-603	41/1407	4E-05	MicroRNA.org
miR-103	22/472	6E-05	TargetScan
