# Supplementary material for: Blood-Informative Transcripts Define Nine Common Axes of Peripheral Blood Gene Expression
Source: PubMed Central journal article supplement (PMC3597511; doi:10.1371/journal.pgen.1003362), 2013-03-14

Supplementary Figure S5 Preininger et al, 2012

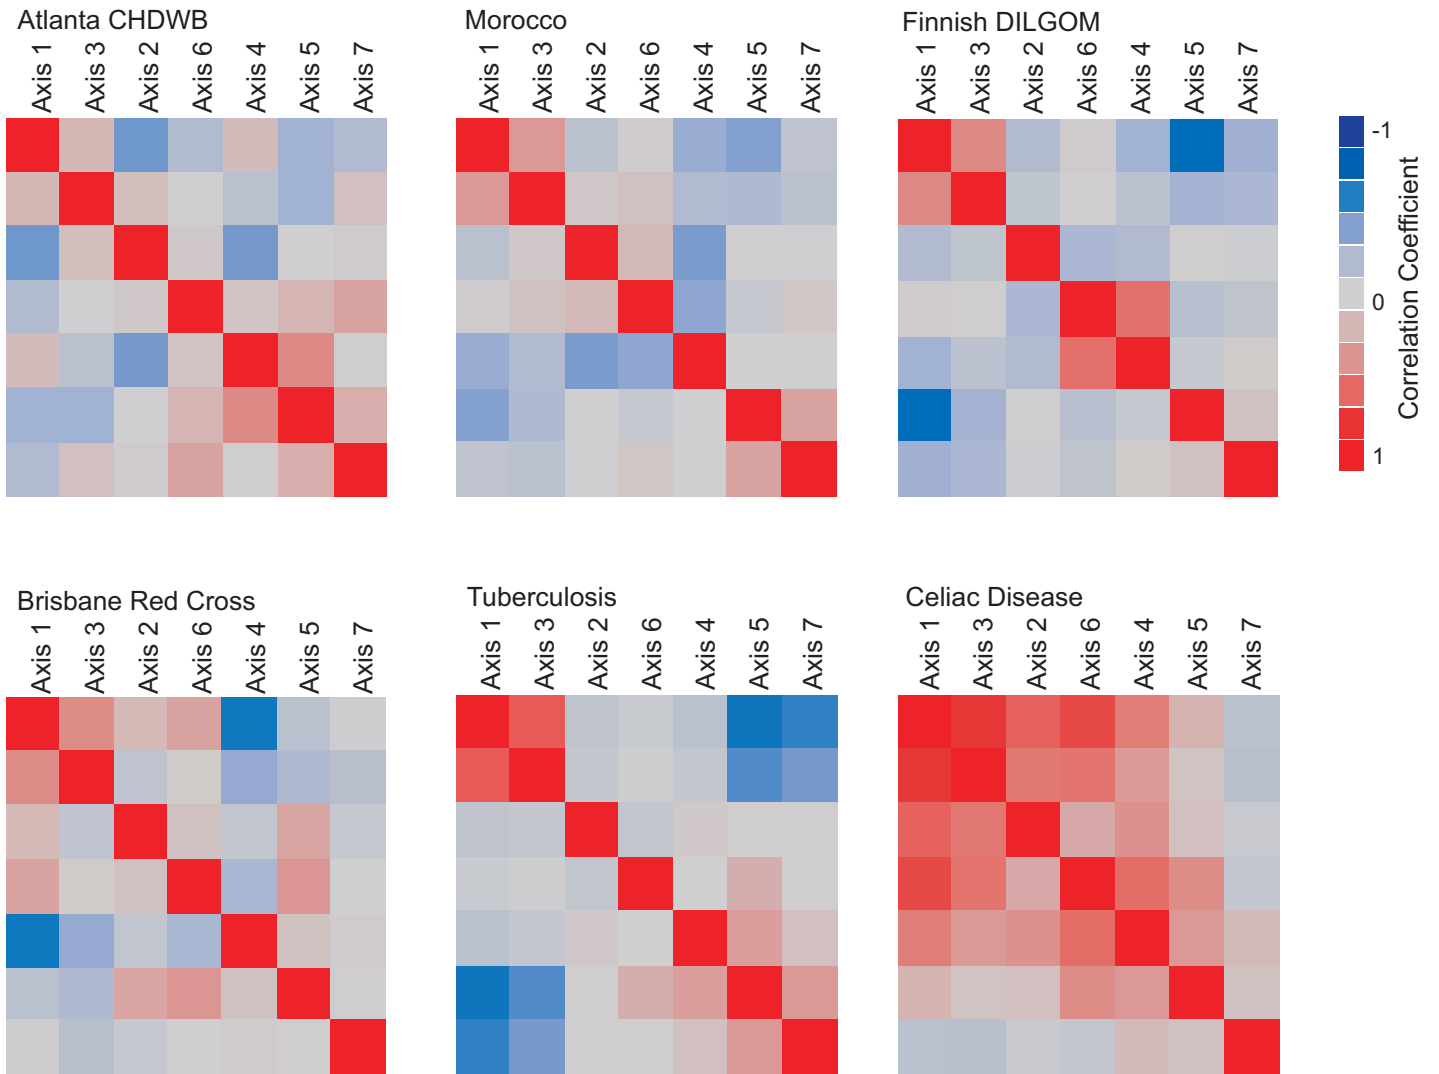

Supplement: pgen.1003362.s009.pdf [file pgen.1003362.s009.pdf]
