# Supplementary material for: Blood-Informative Transcripts Define Nine Common Axes of Peripheral Blood Gene Expression
Source: PubMed Central journal article supplement (PMC3597511; doi:10.1371/journal.pgen.1003362), 2013-03-14

Supplementary Figure S8. Preininger et al, 2012

**A.**

| Variance Explained by IIT |      |      |       |
|---------------------------|------|------|-------|
| PC1                       | LCL  | PB   | Pcorr |
| Axis 1                    | 61.3 | 63.8 | 0.05  |
| Axis 2                    | 18.0 | 67.6 | 0.14  |
| Axis 3                    | 43.6 | 63.5 | 0.88  |
| Axis 4                    | 84.0 | 84.3 | 0.05  |
| Axis 5                    | 44.7 | 77.0 | 0.05  |
| Axis 6                    | 91.1 | 90.0 | 0.88  |
| Axis 7                    | 69.2 | 74.3 | 0.01  |

**B.**

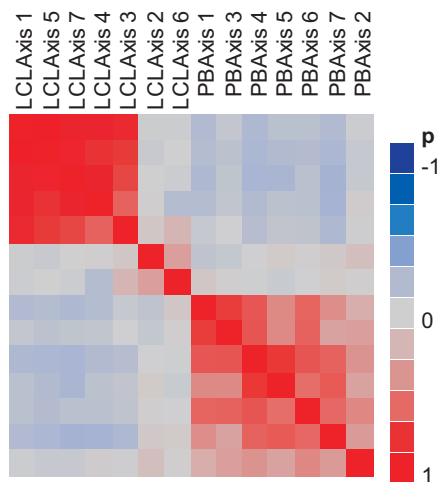

**C.**

| Twin-Twin Correlations |         |             |               |      |
|------------------------|---------|-------------|---------------|------|
| R                      | LCL     |             | PB            |      |
| Axis 1                 | 0.61    | ***         | 0.38          | **   |
| Axis 2                 | 0.28    | ns          | 0.34          | *    |
| Axis 3                 | 0.35    | ns          | 0.61          | **** |
| Axis 4                 | 0.55    | **          | 0.53          | **   |
| Axis 5                 | 0.71    | ****        | 0.42          | *    |
| Axis 6                 | 0.41    | **          | 0.50          | ***  |
| Axis 7                 | 0.62    | ***         | 0.35          | *    |
| * p<.05                | **p<.01 | *** p<.0001 | **** p<.00001 |      |

**D.**

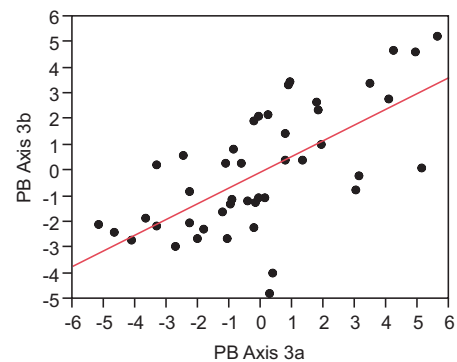

Supplement: pgen.1003362.s012.pdf [file pgen.1003362.s012.pdf]
